# Supplementary material for: Disrupted gut microbiota promotes the progression of chronic kidney disease in 5/6 nephrectomy mice by Bacillus pumilus gavage
Source: Front Cell Infect Microbiol. 2025 Mar 18;15:1548767. doi: 10.3389/fcimb.2025.1548767 (PMC11959065; doi:10.3389/fcimb.2025.1548767)
Supplement: Supplementary file 2 [file Table1.xlsx]

## Sheet: up_CG_vs_SG
Metabolite	P_value	FDR	VIP_pred_OPLS-DA	VIP_PLS-DA	FC(control/Sham)	Log2FC(control/Sham)	Significant	Regulate	level	KEGG Compound ID	KEGG Compound First Category	KEGG Compound Second Category	KEGG Pathway ID	KEGG Pathway Description	KEGG Pathway First Category	KEGG Pathway Second Category	Library ID	HMDB Superclass	HMDB Class	HMDB Subclass	CAS ID	M/Z	Retention time	Adducts	Formula	Fragmentation Score	Theoretical Fragmentation Score	Metab ID	ID	Mode	Score	control_mean	control_SD	sham_mean	sham_SD
Gpa(14:1/13:0)	1.277e-09	1.578e-06	6.8002	6.7704	6.4389	2.6868	yes	up	B(i)	-	-	-	-	-	-	-	-	-	-	-	-	599.371	6.1033	M+Na	C30H57O8P	58.8	0	metab_3895	pos_3896	pos	48.7	6.218	0.04488	0.9657	0.2851
N-[1-Hydroxy-3-(Morpholin-4-Yl)-1-Phenylpropan-2-Yl]Hexadecanamide	5.244e-09	3.786e-06	5.9658	5.9518	2.8343	1.503	yes	up	B(ii)	-	-	-	-	-	-	-	HMDB0249892	Organic nitrogen compounds	Organonitrogen compounds	Amines	-	475.389	6.08048	M+H	C29H50N2O3	0	50.7	metab_7252	pos_7253	pos	47.7	6.278	0.08248	2.215	0.2574
Dehydrocarpaine I	6.098e-07	0.000124	5.7857	5.7373	3.2571	1.7036	yes	up	B(ii)	-	-	-	-	-	-	-	HMDB0030271	Phenylpropanoids and polyketides	Macrolides and analogues	Not Available	72362-02-8	477.368	5.90957	M+H	C28H48N2O4	0	51.6	metab_3613	pos_3614	pos	47.6	5.498	0.4301	1.688	0.1237
Ganoderiol I	0.001091	0.02608	5.5491	5.597	2.3923	1.2584	yes	up	B(ii)	-	-	-	-	-	-	-	HMDB0037778	Lipids and lipid-like molecules	Prenol lipids	Triterpenoids	114567-49-6	502.363	6.08048	M+	C31H50O5	0	47.5	metab_7251	pos_7252	pos	47.3	6.873	0.06274	2.873	1.708
Pa(20:5(5Z,8Z,11Z,14Z,17Z)/18:3(9Z,12Z,15Z))	6.524e-10	9.423e-07	5.4957	5.4978	2.4653	1.3018	yes	up	B(ii)	_;C00416	-;Lipids	-;Phospholipids	map01100;map00564;map01110;map00561;map05212;map05200;map04975;map04024;map05231;map04072;map04912;map04070;map04666	Metabolic pathways;Glycerophospholipid metabolism;Biosynthesis of secondary metabolites;Glycerolipid metabolism;Pancreatic cancer;Pathways in cancer;Fat digestion and absorption;cAMP signaling pathway;Choline metabolism in cancer;Phospholipase D signaling pathway;GnRH signaling pathway;Phosphatidylinositol signaling system;Fc gamma R-mediated phagocytosis	Metabolism;Metabolism;Metabolism;Metabolism;Human Diseases;Human Diseases;Organismal Systems;Environmental Information Processing;Human Diseases;Environmental Information Processing;Organismal Systems;Environmental Information Processing;Organismal Systems	Global and overview maps;Lipid metabolism;Global and overview maps;Lipid metabolism;Cancer: specific types;Cancer: overview;Digestive system;Signal transduction;Cancer: overview;Signal transduction;Endocrine system;Signal transduction;Immune system	HMDB0115207	Lipids and lipid-like molecules	Glycerophospholipids	Glycerophosphates	_;	681.424	5.84722	M+H-2H2O	C41H65O8P	0	53.4	metab_3556	pos_3557	pos	46.3	5.823	0.1483	2.362	0.02731
Pa(10:0/A-15:0)	1.092e-08	6.133e-06	5.396	5.3951	2.0274	1.0196	yes	up	B(ii)	_;C00416	-;Lipids	-;Phospholipids	map01100;map00564;map01110;map00561;map05212;map05200;map04975;map04024;map05231;map04072;map04912;map04070;map04666	Metabolic pathways;Glycerophospholipid metabolism;Biosynthesis of secondary metabolites;Glycerolipid metabolism;Pancreatic cancer;Pathways in cancer;Fat digestion and absorption;cAMP signaling pathway;Choline metabolism in cancer;Phospholipase D signaling pathway;GnRH signaling pathway;Phosphatidylinositol signaling system;Fc gamma R-mediated phagocytosis	Metabolism;Metabolism;Metabolism;Metabolism;Human Diseases;Human Diseases;Organismal Systems;Environmental Information Processing;Human Diseases;Environmental Information Processing;Organismal Systems;Environmental Information Processing;Organismal Systems	Global and overview maps;Lipid metabolism;Global and overview maps;Lipid metabolism;Cancer: specific types;Cancer: overview;Digestive system;Signal transduction;Cancer: overview;Signal transduction;Endocrine system;Signal transduction;Immune system	HMDB0115607	Lipids and lipid-like molecules	Glycerophospholipids	Glycerophosphates	-	614.382	5.83942	M+ACN+Na	C28H55O8P	0	48.3	metab_3550	pos_3551	pos	48	6.593	0.2159	3.252	0.02742
N-Nervonoyl Glutamine	9.251e-09	5.727e-06	5.2218	5.2	1.8632	0.8978	yes	up	B(ii)	-	-	-	-	-	-	-	HMDB0242089	Not Available	Not Available	Not Available	-	536.441	5.85502	M+ACN+H	C29H54N2O4	0	57.4	metab_3562	pos_3563	pos	50.7	6.7	0.1956	3.596	0.02742
Lps(19:0)-D5	1.254e-08	6.715e-06	5.0511	5.0485	1.977	0.9833	yes	up	B(i)	-	-	-	-	-	-	-	-	-	-	-	-	578.288	5.89395	M+K	C25H50NO9P	49.4	0	metab_3594	pos_3595	pos	47.7	5.919	0.1527	2.994	0.1382
Pa(22:5(4Z,7Z,10Z,13Z,16Z)/15:0)	5.422e-09	3.786e-06	4.9105	4.9019	1.7159	0.779	yes	up	B(ii)	_;C00416	-;Lipids	-;Phospholipids	map01100;map00564;map01110;map00561;map05212;map05200;map04975;map04024;map05231;map04072;map04912;map04070;map04666	Metabolic pathways;Glycerophospholipid metabolism;Biosynthesis of secondary metabolites;Glycerolipid metabolism;Pancreatic cancer;Pathways in cancer;Fat digestion and absorption;cAMP signaling pathway;Choline metabolism in cancer;Phospholipase D signaling pathway;GnRH signaling pathway;Phosphatidylinositol signaling system;Fc gamma R-mediated phagocytosis	Metabolism;Metabolism;Metabolism;Metabolism;Human Diseases;Human Diseases;Organismal Systems;Environmental Information Processing;Human Diseases;Environmental Information Processing;Organismal Systems;Environmental Information Processing;Organismal Systems	Global and overview maps;Lipid metabolism;Global and overview maps;Lipid metabolism;Cancer: specific types;Cancer: overview;Digestive system;Signal transduction;Cancer: overview;Signal transduction;Endocrine system;Signal transduction;Immune system	HMDB0115351	Lipids and lipid-like molecules	Glycerophospholipids	Glycerophosphates	-	673.456	5.7069	M+H-2H2O	C40H69O8P	0	51.2	metab_7652	pos_7653	pos	47.8	6.608	0.1603	3.851	0.02743
Nanaomycin	5.643e-08	2.108e-05	4.8822	4.8692	1.9352	0.9525	yes	up	B(i)	-	-	-	-	-	-	-	-	-	-	-	-	301.071	5.47418	M-H	C16H14O6	49.9	0	metab_17642	neg_6451	neg	48.9	5.643	0.1621	2.916	0.1797
Pa(8:0/15:0)	5.076e-06	0.0005545	4.4645	4.4897	1.6277	0.7028	yes	up	B(ii)	_;C00416	-;Lipids	-;Phospholipids	map01100;map00564;map01110;map00561;map05212;map05200;map04975;map04024;map05231;map04072;map04912;map04070;map04666	Metabolic pathways;Glycerophospholipid metabolism;Biosynthesis of secondary metabolites;Glycerolipid metabolism;Pancreatic cancer;Pathways in cancer;Fat digestion and absorption;cAMP signaling pathway;Choline metabolism in cancer;Phospholipase D signaling pathway;GnRH signaling pathway;Phosphatidylinositol signaling system;Fc gamma R-mediated phagocytosis	Metabolism;Metabolism;Metabolism;Metabolism;Human Diseases;Human Diseases;Organismal Systems;Environmental Information Processing;Human Diseases;Environmental Information Processing;Organismal Systems;Environmental Information Processing;Organismal Systems	Global and overview maps;Lipid metabolism;Global and overview maps;Lipid metabolism;Cancer: specific types;Cancer: overview;Digestive system;Signal transduction;Cancer: overview;Signal transduction;Endocrine system;Signal transduction;Immune system	HMDB0115486	Lipids and lipid-like molecules	Glycerophospholipids	Glycerophosphates	-	545.325	6.09553	M+Na	C26H51O8P	0	40.6	metab_3885	pos_3886	pos	44.2	6.107	0.2034	3.752	0.3629
Contignasterol	5.867e-07	0.0001208	4.381	4.3878	1.5994	0.6775	yes	up	B(ii)	C19902;_	-	-	-	-	-	-	HMDB0250439	Lipids and lipid-like molecules	Prenol lipids	Triterpenoids	137571-30-3;_	543.312	6.06778	M+Cl	C29H48O7	0	62.8	metab_17160	neg_5969	neg	50.1	5.94	0.1795	3.714	0.2134
3,7-Dihydroxy-25-Methoxycucurbita-5,23-Dien-19-Al	1.281e-06	0.0002057	4.2835	4.2609	1.5148	0.5991	yes	up	B(ii)	-	-	-	-	-	-	-	HMDB0039362	Lipids and lipid-like molecules	Steroids and steroid derivatives	Cucurbitacins	-	486.369	6.0653	M+	C31H50O4	0	73.8	metab_3850	pos_3851	pos	51.8	6.203	0.25	4.095	0.1277
Pa(I-12:0/I-13:0)	2.09e-09	2.098e-06	4.1817	4.1661	1.4863	0.5717	yes	up	B(ii)	_;C00416	-;Lipids	-;Phospholipids	map01100;map00564;map01110;map00561;map05212;map05200;map04975;map04024;map05231;map04072;map04912;map04070;map04666	Metabolic pathways;Glycerophospholipid metabolism;Biosynthesis of secondary metabolites;Glycerolipid metabolism;Pancreatic cancer;Pathways in cancer;Fat digestion and absorption;cAMP signaling pathway;Choline metabolism in cancer;Phospholipase D signaling pathway;GnRH signaling pathway;Phosphatidylinositol signaling system;Fc gamma R-mediated phagocytosis	Metabolism;Metabolism;Metabolism;Metabolism;Human Diseases;Human Diseases;Organismal Systems;Environmental Information Processing;Human Diseases;Environmental Information Processing;Organismal Systems;Environmental Information Processing;Organismal Systems	Global and overview maps;Lipid metabolism;Global and overview maps;Lipid metabolism;Cancer: specific types;Cancer: overview;Digestive system;Signal transduction;Cancer: overview;Signal transduction;Endocrine system;Signal transduction;Immune system	HMDB0115782	Lipids and lipid-like molecules	Glycerophospholipids	Glycerophosphates	-	573.356	6.08048	M+Na	C28H55O8P	0	61.7	metab_7249	pos_7250	pos	48.9	6.082	0.09919	4.092	0.02743
Fa(12:1+1O)	6.216e-06	0.0006441	4.1694	4.1692	1.6681	0.7382	yes	up	B(i)	-	-	-	-	-	-	-	-	-	-	-	-	259.155	4.12853	M+FA-H	C12H22O3	53.1	0	metab_18270	neg_7079	neg	49.4	5.081	0.1012	3.046	0.3667
Gynocardin	2.472e-08	1.168e-05	4.108	4.0934	1.4333	0.5193	yes	up	B(ii)	C08331	-	-	-	-	-	-	HMDB0029913	Organic oxygen compounds	Organooxygen compounds	Carbohydrates and carbohydrate conjugates	14332-17-3	345.13	2.88913	M+ACN+H	C12H17NO8	0	65.6	metab_9307	pos_9308	pos	52	6.371	0.06191	4.445	0.146
(8R,9S,13S,14S)-3-Hydroxy-13-Methyl-1-Octadec-9-Enoyl-7,8,9,11,12,14,15,16-Octahydro-6H-Cyclopenta[A]Phenanthren-17-One	0.0006668	0.0185	4.1031	4.0205	1.4805	0.5661	yes	up	B(ii)	-	-	-	-	-	-	-	HMDB0260178	Lipids and lipid-like molecules	Steroids and steroid derivatives	Estrane steroids	-	535.41	6.14145	M+H	C36H54O3	0	69.9	metab_7184	pos_7185	pos	50.2	6.264	0.6344	4.231	0.3179
Sulfo Jasmonate	1.518e-06	0.0002233	4.0962	4.0694	1.4069	0.4925	yes	up	B(i)	-	-	-	-	-	-	-	-	-	-	-	-	305.07	4.56698	M-H	C12H18O7S	70.9	0	metab_18073	neg_6882	neg	53.1	6.649	0.04651	4.726	0.2903
(3S,5R,6R,6'S)-6,7-Didehydro-5,6-Dihydro-3,5,6'-Trihydroxy-13,14,20-Trinor-3'-Oxo-Beta,Epsilon-Caroten-19',11'-Olide 3-Acetate	3.611e-05	0.002311	4.0314	4.0502	1.5009	0.5858	yes	up	B(ii)	-	-	-	-	-	-	-	HMDB0037793	Lipids and lipid-like molecules	Prenol lipids	Terpene lactones	256505-50-7	593.332	7.71665	M+H-2H2O	C39H48O7	0	43.9	metab_5654	pos_5655	pos	43.7	5.846	0.2511	3.895	0.384
N-Linoleoyl Lysine	1.529e-06	0.0002233	3.9093	3.8829	1.4773	0.5629	yes	up	B(ii)	-	-	-	-	-	-	-	HMDB0241980	Not Available	Not Available	Not Available	-	463.352	5.89395	M+CH3OH+Na	C24H44N2O3	0	54.4	metab_3591	pos_3592	pos	47.6	5.423	0.2307	3.671	0.03886
(+/-)-Tryptophan	7.034e-07	0.0001371	3.8441	3.849	1.553	0.6351	yes	up	B(ii)	C00806	-	-	-	-	-	-	HMDB0030396	Organoheterocyclic compounds	Indoles and derivatives	Indolyl carboxylic acids and derivatives	1954-12-06	259.107	5.25432	M+CH3OH+Na	C11H12N2O2	0	53	metab_3256	pos_3257	pos	47.6	4.816	0.06118	3.101	0.2245
Urobilinogen	5.14e-07	0.0001131	3.809	3.8173	1.4197	0.5056	yes	up	B(ii)	C05790;C05791	-	-	map01100;map01110;map00860	Metabolic pathways;Biosynthesis of secondary metabolites;Porphyrin metabolism	Metabolism;Metabolism;Metabolism	Global and overview maps;Global and overview maps;Metabolism of cofactors and vitamins	HMDB0004158	Organoheterocyclic compounds	Tetrapyrroles and derivatives	Bilirubins	14684-37-8;17208-65-0	623.343	5.53525	M+CH3OH+H	C33H42N4O6	0	71	metab_7721	pos_7722	pos	52.3	5.703	0.1658	4.017	0.11
Phenobarbital	0.0003374	0.01122	3.7242	3.7567	1.6048	0.6824	yes	up	B(ii)	C07434	-	-	map05207	Chemical carcinogenesis - receptor activation	Human Diseases	Cancer: overview	HMDB0015305	Organoheterocyclic compounds	Diazines	Pyrimidines and pyrimidine derivatives	1950/6/6;50-06-6	277.083	2.96678	M+FA-H	C12H12N2O3	0	42	metab_18839	neg_7648	neg	46.1	4.625	0.1426	2.882	0.589
Trans-Piceid	7.742e-09	5.181e-06	3.5654	3.5533	1.3525	0.4356	yes	up	B(ii)	C10275	-	-	-	-	-	-	HMDB0030564	Phenylpropanoids and polyketides	Stilbenes	Stilbene glycosides	27208-80-6	389.121	3.48442	M-H	C20H22O8	0	68.1	metab_12640	neg_1449	neg	48.4	5.56	0.02681	4.111	0.09875
Supinidine	4.426e-07	0.000103	3.5355	3.52	1.3545	0.4377	yes	up	B(ii)	C10400	-	-	-	-	-	-	HMDB0302361	Alkaloids and derivatives	Not Available	Not Available	551-59-7;_	184.097	5.30805	M+FA-H	C8H13NO	0	48.3	metab_13512	neg_2321	neg	48.2	5.468	0.02386	4.037	0.1815
Ethyl 2-(2-Acetyl-3,5-Dihydroxyphenyl)Acetate	0.0001245	0.005434	3.4743	3.4299	1.4377	0.5238	yes	up	B(i)	-	-	-	-	-	-	-	-	-	-	-	-	283.082	4.86972	M+FA-H	C12H14O5	41.6	0	metab_13297	neg_2106	neg	46.3	4.677	0.1119	3.253	0.4056
5-Methyl-N-[(1-Methylbenzimidazol-5-Yl)Methyl]Thiophene-2-Carboxamide	0.0001377	0.005743	3.4625	3.4715	1.4731	0.5588	yes	up	B(i)	-	-	-	-	-	-	-	-	-	-	-	-	286.104	4.70778	M+H	C15H15N3OS	79.3	0	metab_8117	pos_8118	pos	49.7	4.543	0.1124	3.084	0.4238
3-Hydroxy-12-Oxocholan-24-Oic Acid	3.934e-06	0.0004545	3.4511	3.43	1.3111	0.3908	yes	up	B(i)	-	-	-	-	-	-	-	-	-	-	-	-	391.283	7.88803	M+H	C24H38O4	81.7	0	metab_5525	pos_5526	pos	54.6	5.79	0.1784	4.416	0.1284
Mesobilirubinogen	2.603e-06	0.0003265	3.4164	3.4254	1.3179	0.3982	yes	up	B(ii)	C05790	-	-	map00860	Porphyrin metabolism	Metabolism	Metabolism of cofactors and vitamins	HMDB0001898	Organoheterocyclic compounds	Tetrapyrroles and derivatives	Bilirubins	14684-37-8	591.319	5.86693	M-H	C33H44N4O6	0	45.8	metab_13795	neg_2604	neg	47.3	5.659	0.1166	4.294	0.1828
Ethyl Sulfate	4.934e-05	0.002979	3.3967	3.4038	1.3014	0.3801	yes	up	B(i)	-	-	-	-	-	-	-	HMDB0031233	Organic acids and derivatives	Organic sulfuric acids and derivatives	Sulfuric acid esters	540-82-9	170.996	0.687817	M+FA-H	C2H6O4S	65.2	0	metab_19555	neg_8364	neg	51	5.976	0.08993	4.592	0.3426
Dg(14:1(9Z)/16:1(9Z)/0:0)	0.0125	0.1178	3.3763	3.3703	1.3829	0.4676	yes	up	B(ii)	_;C00165	-	-	map05214;map05167;map04650;map05163;map04750;map05235;map04015;map04014;map04659;map04540;map04010;map04012;map05022;map04370;map04371;map04072;map04071;map04975;map05143;map05012;map05231;map05146;map04919;map05200;map04961;map04745;map04921;map04920;map04923;map04925;map05017;map04625;map04929;map04726;map04725;map04724;map04723;map04722;map05223;map04720;map04666;map05170;map04664;map04658;map…	Glioma;Kaposi sarcoma-associated herpesvirus infection;Natural killer cell mediated cytotoxicity;Human cytomegalovirus infection;Inflammatory mediator regulation of TRP channels;PD-L1 expression and PD-1 checkpoint pathway in cancer;Rap1 signaling pathway;Ras signaling pathway;Th17 cell differentiation;Gap junction;MAPK signaling pathway;ErbB signaling pathway;Pathways of neurodegeneration - mult…	Human Diseases;Human Diseases;Organismal Systems;Human Diseases;Organismal Systems;Human Diseases;Environmental Information Processing;Environmental Information Processing;Organismal Systems;Cellular Processes;Environmental Information Processing;Environmental Information Processing;Human Diseases;Environmental Information Processing;Environmental Information Processing;Environmental Information …	Cancer: specific types;Infectious disease: viral;Immune system;Infectious disease: viral;Sensory system;Cancer: overview;Signal transduction;Signal transduction;Immune system;Cellular community - eukaryotes;Signal transduction;Signal transduction;Neurodegenerative disease;Signal transduction;Signal transduction;Signal transduction;Signal transduction;Digestive system;Infectious disease: parasitic…	HMDB0007041	Lipids and lipid-like molecules	Glycerolipids	Diradylglycerols	-	536.441	5.34017	M+	C33H60O5	0	41.1	metab_3302	pos_3303	pos	45.3	5.967	0.4308	4.315	1.012
Deoxycholic Acid 3-Glucuronide	0.0001278	0.005483	3.3198	3.3118	1.2987	0.3771	yes	up	B(ii)	C03033;_	-	-	map01100;map00040;map04976;map00053;map01240	Metabolic pathways;Pentose and glucuronate interconversions;Bile secretion;Ascorbate and aldarate metabolism;Biosynthesis of cofactors	Metabolism;Metabolism;Organismal Systems;Metabolism;Metabolism	Global and overview maps;Carbohydrate metabolism;Digestive system;Carbohydrate metabolism;Global and overview maps	HMDB0002596	Lipids and lipid-like molecules	Steroids and steroid derivatives	Steroidal glycosides	72504-58-6;	623.343	5.67568	M+CH3OH+Na	C30H48O10	0	50.3	metab_3464	pos_3465	pos	47.5	5.774	0.1812	4.446	0.3391
Gibberellin A8-Catabolite	2.289e-09	2.162e-06	3.2495	3.2408	1.2771	0.3529	yes	up	B(ii)	C11870;_	-	-	map00904	Diterpenoid biosynthesis	Metabolism	Metabolism of terpenoids and polyketides	HMDB0304364	Lipids and lipid-like molecules	Prenol lipids	Diterpenoids	78791-79-4;_;	343.115	3.48442	M-H2O-H	C19H22O7	0	69.2	metab_12639	neg_1448	neg	49.9	5.549	0.01658	4.345	0.06961
Peldesine	5.157e-09	3.786e-06	3.2439	3.2455	1.2942	0.3721	yes	up	B(ii)	-	-	-	-	-	-	-	HMDB0256208	Organoheterocyclic compounds	Pyrrolopyrimidines	Not Available	-	300.11	3.48442	M+Hac-H	C12H11N5O	0	56.2	metab_18616	neg_7425	neg	49.8	5.314	0.01149	4.106	0.08033
Cer(D18:2(4E,14Z)/18:3(9,11,15)-Oh(13))	0.0002474	0.009101	3.1853	3.1296	1.2427	0.3134	yes	up	B(ii)	-	-	-	-	-	-	-	HMDB0290090	Not Available	Not Available	Not Available	-	578.452	5.98747	M+Na-H2O	C36H63NO4	0	86.9	metab_7404	pos_7405	pos	53.6	6.145	0.3461	4.945	0.02743
7-O-Succinyl Macrolactin A	6.36e-06	0.0006548	3.182	3.1453	1.2325	0.3016	yes	up	B(ii)	-	-	-	-	-	-	-	HMDB0247277	Phenylpropanoids and polyketides	Macrolides and analogues	Not Available	-	520.292	7.91927	M+NH4	C28H38O8	0	45	metab_5535	pos_5536	pos	45.8	6.139	0.1363	4.981	0.1535
Pantethine	0.003622	0.0554	3.1764	3.1383	1.3903	0.4753	yes	up	B(i)	C12661;_	-	-	-	-	-	-	HMDB0256114;HMDB0003828	Organic acids and derivatives	Carboxylic acids and derivatives	Amino acids, peptides, and analogues	16816-67-4;_	553.237	5.01368	M-H	C22H42N4O8S2	87.3	0	metab_17885	neg_6694	neg	53.8	4.706	0.6061	3.385	0.04764
N-(2,3,4-Trihydroxybutyl)-L-Valine	8.369e-08	2.8e-05	3.1645	3.1527	1.252	0.3243	yes	up	B(ii)	-	-	-	-	-	-	-	HMDB0254995	Organic acids and derivatives	Carboxylic acids and derivatives	Amino acids, peptides, and analogues	-	186.112	4.84837	M+H-2H2O	C9H19NO5	0	54.6	metab_8060	pos_8061	pos	50	5.683	0.04772	4.539	0.1012
Isoquinolone	0.0002533	0.009184	3.1376	3.1054	1.2454	0.3167	yes	up	B(i)	-	-	-	-	-	-	-	-	-	-	-	-	146.06	4.88742	M+H	C9H7NO	62.2	0	metab_8040	pos_8041	pos	51.8	6.003	0.3347	4.82	0.08626
5-Hydroxyhexanoylglycine	5.185e-06	0.0005612	3.0986	3.0942	1.2357	0.3054	yes	up	B(ii)	-	-	-	-	-	-	-	HMDB0094722	Organic acids and derivatives	Carboxylic acids and derivatives	Amino acids, peptides, and analogues	-	188.092	2.03925	M-H	C8H15NO4	0	57.1	metab_19069	neg_7878	neg	50	5.871	0.1605	4.751	0.09026
Boc-D-Phenylalanine	3.222e-05	0.002147	3.07	3.054	1.2353	0.3048	yes	up	B(ii)	-	-	-	-	-	-	-	HMDB0249332	Organic acids and derivatives	Carboxylic acids and derivatives	Amino acids, peptides, and analogues	-	248.128	6.0108	M+H-H2O	C14H19NO4	0	46.8	metab_7370	pos_7371	pos	48	5.812	0.04477	4.705	0.2633
N-Acetylhistamine	0.003321	0.05308	2.9118	2.897	1.198	0.2606	yes	up	B(i)	C05135	-	-	map00340	Histidine metabolism	Metabolism	Amino acid metabolism	HMDB0013253	Organic acids and derivatives	Carboxylic acids and derivatives	Carboxylic acid derivatives	-;673-49-4	154.097	0.944533	M+H	C7H11N3O	79.5	0	metab_821	pos_822	pos	53.9	6.789	0.1088	5.667	0.5728
Aplysiatoxin, 17-Debromo-	1.954e-06	0.0002659	2.9074	2.9142	1.1487	0.2	yes	up	B(ii)	-	-	-	-	-	-	-	HMDB0248517	Not Available	Not Available	Not Available	-	593.332	5.7069	M+H	C32H48O10	0	60	metab_7653	pos_7654	pos	51.6	7.624	0.09648	6.637	0.111
Clindamycin	0.01344	0.123	2.9004	2.8463	1.2803	0.3565	yes	up	B(i)	C06914	-	-	-	-	-	-	HMDB0015321;PW_C009603	Organic acids and derivatives	Carboxylic acids and derivatives	Amino acids, peptides, and analogues	18323-44-9	425.188	4.5438	M+H	C18H33ClN2O5S	63.5	0	metab_2919	pos_2920	pos	46.2	5.413	0.5185	4.228	0.5631
4-Acetamidobenzaldehyde	2.665e-05	0.001911	2.6949	2.6948	1.2266	0.2946	yes	up	B(i)	-	-	-	-	-	-	-	-	-	-	-	-	164.07	5.78483	M+H	C9H9NO2	74.3	0	metab_3506	pos_3507	pos	52.6	4.661	0.1528	3.8	0.09982
Loxoribine	0.0008384	0.02154	2.6918	2.6711	1.2211	0.2881	yes	up	B(ii)	-	-	-	-	-	-	-	HMDB0254180	Nucleosides, nucleotides, and analogues	Purine nucleosides	Not Available	-	394.134	2.93655	M+CH3OH+Na	C13H17N5O6	0	61.3	metab_9260	pos_9261	pos	50.1	4.977	0.2053	4.076	0.2818
Cervonoyl Ethanolamide	0.0004195	0.01319	2.6836	2.638	1.1796	0.2383	yes	up	B(ii)	C13828	-	-	-	-	-	-	HMDB0013627	Lipids and lipid-like molecules	Fatty Acyls	Fatty acid esters	-	337.252	7.87243	M+H-2H2O	C24H36O3	0	82.5	metab_5517	pos_5518	pos	54.5	5.674	0.1675	4.81	0.2476
Lysopc(14:1(9Z)/0:0)	0.0001638	0.00656	2.6634	2.6672	1.2007	0.2639	yes	up	B(ii)	C04230	Lipids	Phospholipids	map00564;map05231	Glycerophospholipid metabolism;Choline metabolism in cancer	Metabolism;Human Diseases	Lipid metabolism;Cancer: overview	HMDB0010380	Lipids and lipid-like molecules	Glycerophospholipids	Glycerophosphocholines	-	470.264	5.44942	M+Na-H2O	C22H44NO7P	0	42.7	metab_7769	pos_7770	pos	46.3	5.174	0.2328	4.309	0.02743
Arabinogalactose	0.04208	0.2276	2.6414	2.6356	1.4035	0.489	yes	up	B(ii)	C07285	-	-	-	-	-	-	HMDB0302563	Organic oxygen compounds	Organooxygen compounds	Carbohydrates and carbohydrate conjugates	-	293.088	2.2655	M-H2O-H	C11H20O10	0	40.5	metab_18901	neg_7710	neg	46.5	4.014	0.9162	2.86	0.04759
A,15-Dihydroxydehydroabietic Acid	2.429e-06	0.0003121	2.6072	2.6094	1.1962	0.2585	yes	up	B(i)	-	-	-	-	-	-	-	-	-	-	-	-	355.185	5.2699	M+Na	C20H28O4	40.8	0	metab_3266	pos_3267	pos	42.7	4.834	0.09559	4.041	0.0695
4-(4-Tert-Butyl-1,3-Thiazol-2-Yl)-N-(Cyclohexylmethyl)Thiophene-2-Sulfonamide	0.003934	0.05873	2.5871	2.5889	1.2358	0.3054	yes	up	B(i)	-	-	-	-	-	-	-	-	-	-	-	-	399.127	3.9238	M+H	C18H26N2O2S3	90.9	0	metab_8538	pos_8539	pos	51.3	4.738	0.2764	3.834	0.3685
Norethindrone Oxime	0.02325	0.1677	2.5825	2.6091	1.3034	0.3822	yes	up	B(ii)	-	-	-	-	-	-	-	HMDB0255732	Lipids and lipid-like molecules	Steroids and steroid derivatives	Estrane steroids	-	358.202	6.49947	M+FA-H	C20H27NO2	0	59.7	metab_16528	neg_5337	neg	47.6	4.494	0.7115	3.448	0.05857
N-Myristoyl Tyrosine	0.007645	0.08846	2.5813	2.6042	1.2146	0.2804	yes	up	B(ii)	-	-	-	-	-	-	-	HMDB0242062	Organic acids and derivatives	Carboxylic acids and derivatives	Amino acids, peptides, and analogues	-	396.252	6.82178	M+Na-H2O	C23H37NO4	0	53	metab_4968	pos_4969	pos	48.5	5.372	0.5001	4.423	0.08655
7-Hydroxyoct-1-Enoylglycine	3.181e-05	0.002129	2.5718	2.5568	1.1971	0.2595	yes	up	B(ii)	-	-	-	-	-	-	-	HMDB0094773	Organic acids and derivatives	Carboxylic acids and derivatives	Amino acids, peptides, and analogues	-	220.097	5.10602	M+Na-H2O	C10H17NO4	0	54.9	metab_3193	pos_3194	pos	47.8	4.714	0.0506	3.938	0.1785
Pirmenol	0.003171	0.05191	2.5679	2.5726	1.1997	0.2627	yes	up	B(ii)	-	-	-	-	-	-	-	HMDB0256607	Benzenoids	Benzene and substituted derivatives	Phenylbutylamines	-	361.225	2.77962	M+Na	C22H30N2O	0	44.3	metab_9400	pos_9401	pos	45.1	5.311	0.06934	4.427	0.4504
3H-Adrenaline	2.682e-06	0.0003313	2.559	2.5447	1.1696	0.2261	yes	up	B(ii)	-	-	-	-	-	-	-	HMDB0246263	Organic oxygen compounds	Organooxygen compounds	Alcohols and polyols	-	186.112	5.00447	M+H	C9H15NO3	0	41.3	metab_3154	pos_3155	pos	47.1	5.199	0.1032	4.445	0.04064
Strophanthidinic Acid Lactone Acetate	0.0007184	0.01942	2.5562	2.5099	1.1797	0.2384	yes	up	B(i)	-	-	-	-	-	-	-	-	-	-	-	-	503.232	7.55865	M+Hac-H	C25H32O7	42.6	0	metab_15513	neg_4322	neg	43.9	5.213	0.2682	4.419	0.06184
1-Acetamidocyclopentanecarboxylic Acid	7.085e-07	0.0001371	2.4642	2.4549	1.149	0.2004	yes	up	B(i)	-	-	-	-	-	-	-	-	-	-	-	-	172.097	3.72028	M+H	C8H13NO3	61.9	0	metab_8676	pos_8677	pos	51.3	5.382	0.04094	4.684	0.08333
Dalcetrapib	0.009431	0.09997	2.4528	2.4155	1.1925	0.254	yes	up	B(ii)	-	-	-	-	-	-	-	HMDB0250834	Benzenoids	Benzene and substituted derivatives	Anilides	-	394.219	6.9999	M+Na-H2O	C23H35NO2S	0	70.4	metab_5974	pos_5975	pos	50.3	5.147	0.1275	4.316	0.5134
1-[2-(1,3-Benzodioxol-5-Yl)-2-Hydroxypropyl]-3-Cyclohexylurea	2.277e-05	0.001709	2.4508	2.4445	1.1395	0.1884	yes	up	B(i)	-	-	-	-	-	-	-	-	-	-	-	-	321.18	5.94852	M+H	C17H24N2O4	50.4	0	metab_3658	pos_3659	pos	45.8	5.776	0.1037	5.069	0.1101
Loganic Acid	0.00602	0.07643	2.4316	2.4105	1.2061	0.2704	yes	up	B(i)	C01512	-	-	map01110;map00902	Biosynthesis of secondary metabolites;Monoterpenoid biosynthesis	Metabolism;Metabolism	Global and overview maps;Metabolism of terpenoids and polyketides	-;LMPR01020138	-	-	-	22255-40-9;	411.108	4.4885	M+Cl	C16H24O10	83.1	0	metab_13149	neg_1958	neg	53.2	4.693	0.2466	3.891	0.3744
2-Aminopyridine	0.01842	0.1473	2.4214	2.4091	1.2244	0.2921	yes	up	B(i)	-	-	-	-	-	-	-	HMDB0245026	Organoheterocyclic compounds	Pyridines and derivatives	Aminopyridines and derivatives	-	112.087	1.19382	M+NH4	C5H6N2	52.6	0	metab_979	pos_980	pos	49	4.779	0.06317	3.903	0.6489
Lappaol C	0.005963	0.07607	2.4166	2.4149	1.2018	0.2652	yes	up	B(ii)	C17686;_	-	-	-	-	-	-	HMDB0301813	Lignans, neolignans and related compounds	Furanoid lignans	Tetrahydrofuran lignans	-;64855-00-1	575.191	7.43828	M+Na-2H	C30H34O10	0	54.5	metab_15838	neg_4647	neg	45.4	4.806	0.2535	3.999	0.37
Diterpene Alkaloid	0.000146	0.005997	2.4137	2.406	1.1339	0.1812	yes	up	B(ii)	-	-	-	-	-	-	-	HMDB0251489	Lipids and lipid-like molecules	Prenol lipids	Diterpenoids	-	406.294	7.73992	M+H	C24H39NO4	0	53.2	metab_5456	pos_5457	pos	48.8	5.955	0.07413	5.252	0.1977
Cerp(D15:1/16:0)	0.02144	0.161	2.3954	2.3076	1.1783	0.2367	yes	up	B(i)	-	-	-	-	-	-	-	-	-	-	-	-	576.436	5.90177	M+H	C31H62NO6P	40.4	0	metab_7522	pos_7523	pos	44.2	5.379	0.5439	4.565	0.02743
D-Pantethine	0.01711	0.1416	2.376	2.3274	1.1543	0.2071	yes	up	B(i)	-	-	-	-	-	-	-	HMDB0003828	Organic acids and derivatives	Carboxylic acids and derivatives	Amino acids, peptides, and analogues	16816-67-4	555.251	4.5438	M+H	C22H42N4O8S2	87.4	0	metab_8206	pos_8207	pos	55.4	6.051	0.4831	5.242	0.1994
3,7-Dihydroxy-12-Oxocholanoic Acid	4.052e-05	0.002532	2.3485	2.3412	1.1105	0.1512	yes	up	B(ii)	-	-	-	-	-	-	-	HMDB0000400	Lipids and lipid-like molecules	Steroids and steroid derivatives	Bile acids, alcohols and derivatives	2458-08-04	424.305	7.73992	M+NH4	C24H38O5	0	84.2	metab_5642	pos_5643	pos	55.6	6.561	0.07201	5.908	0.1412
3',5,7-Trihydroxy-3'-Methoxyflavanone, Homoeriodictyol	0.0008232	0.02136	2.3354	2.2977	1.1586	0.2124	yes	up	B(i)	-	-	-	-	-	-	-	-	-	-	-	-	301.075	4.39713	M-H	C16H14O6	63.1	0	metab_18146	neg_6955	neg	48	4.872	0.1622	4.205	0.1968
2,4-Quinolinediol	0.004075	0.06007	2.3331	2.3517	1.1553	0.2083	yes	up	B(i)	C16716	-	-	map00996;map01063	Biosynthesis of various alkaloids;Biosynthesis of alkaloids derived from shikimate pathway	Metabolism;Metabolism	Biosynthesis of other secondary metabolites;Chemical structure transformation maps	HMDB0245468	Organoheterocyclic compounds	Quinolines and derivatives	Quinolones and derivatives	-	162.055	4.49698	M+H	C9H7NO2	65	0	metab_2895	pos_2896	pos	50.7	5.564	0.3445	4.816	0.08238
Glycochenodeoxycholate-3-Sulfate	9.354e-05	0.004433	2.3209	2.3082	1.1163	0.1587	yes	up	B(ii)	-	-	-	-	-	-	-	HMDB0002497	Lipids and lipid-like molecules	Steroids and steroid derivatives	Bile acids, alcohols and derivatives	67030-54-0	530.277	7.73992	M+H	C26H43NO8S	0	50.8	metab_5638	pos_5639	pos	46.6	6.163	0.0659	5.521	0.1669
3-Oxo-4,6-Choladienoic Acid	4.271e-05	0.002638	2.3022	2.293	1.1051	0.1441	yes	up	B(ii)	-	-	-	-	-	-	-	HMDB0000476	Lipids and lipid-like molecules	Steroids and steroid derivatives	Bile acids, alcohols and derivatives	88179-71-9	371.257	7.73992	M+H	C24H34O3	0	50.6	metab_5645	pos_5646	pos	48.6	6.585	0.07307	5.959	0.1343
N-(Oxan-4-Ylmethyl)-1,3-Benzodioxole-5-Carboxamide	5.027e-05	0.00298	2.2633	2.2485	1.1273	0.1729	yes	up	B(i)	-	-	-	-	-	-	-	-	-	-	-	-	264.122	5.05915	M+H	C14H17NO4	59.2	0	metab_7948	pos_7949	pos	50.5	5.347	0.09383	4.743	0.113
8-Oxodiacetoxyscirpenol	0.00247	0.0444	2.2588	2.2432	1.1511	0.203	yes	up	B(ii)	-	-	-	-	-	-	-	HMDB0037056	Lipids and lipid-like molecules	Prenol lipids	Sesquiterpenoids	77620-47-4	379.14	4.69468	M-H	C19H24O8	0	47.8	metab_13230	neg_2039	neg	48.1	5.037	0.06981	4.376	0.317
Coriandrone D	0.0005558	0.01653	2.2162	2.2033	1.1121	0.1532	yes	up	B(ii)	-	-	-	-	-	-	-	HMDB0029972	Organoheterocyclic compounds	Benzopyrans	2-benzopyrans	177795-33-4	333.134	4.69468	M-H2O-H	C18H24O7	0	61.2	metab_13229	neg_2038	neg	51.2	6.014	0.08119	5.408	0.2108
Lysine Conjugated Deoxycholic Acid Putative	0.02746	0.1824	2.1666	2.1076	1.1414	0.1908	yes	up	B(i)	-	-	-	-	-	-	-	-	-	-	-	-	521.395	6.11082	M+H	C30H52N2O5	81.4	0	metab_7211	pos_7212	pos	53.1	5.652	0.4811	4.952	0.1445
Citrusin B	0.004316	0.06222	2.1329	2.097	1.1069	0.1465	yes	up	B(ii)	-	-	-	-	-	-	-	HMDB0039231	Lignans, neolignans and related compounds	Lignan glycosides	Not Available	105279-10-5	591.208	3.82228	M+Na	C27H36O13	0	61.7	metab_8595	pos_8596	pos	49.8	6.183	0.2768	5.586	0.07219
Cyclo(L-Phe-L-Pro)	0.002678	0.04655	2.1314	2.1327	1.146	0.1966	yes	up	B(ii)	C11847;_	-	-	-	-	-	-	HMDB0250631	Organic acids and derivatives	Carboxylic acids and derivatives	Amino acids, peptides, and analogues	3705-26-8;_	245.128	3.81448	M+H	C14H16N2O2	0	48.8	metab_2520	pos_2521	pos	46.4	4.726	0.2446	4.124	0.1065
Thr Phe Leu Thr Gln	0.0004352	0.01355	2.1246	2.1438	1.1075	0.1473	yes	up	B(i)	-	-	-	-	-	-	-	-	-	-	-	-	609.327	5.465	M+H	C28H44N6O9	57.4	0	metab_7762	pos_7763	pos	49.3	5.883	0.1794	5.312	0.02743
Methyl Dihydrophaseate	0.002541	0.0451	2.1165	2.1063	1.1333	0.1805	yes	up	B(ii)	-	-	-	-	-	-	-	HMDB0039376	Lipids and lipid-like molecules	Prenol lipids	Sesquiterpenoids	-	317.139	5.67728	M+Na-2H	C16H24O5	0	46.1	metab_17567	neg_6376	neg	45.9	4.965	0.1462	4.381	0.2361
Geldanamycin	0.02008	0.154	2.0866	2.009	1.1351	0.1828	yes	up	B(ii)	C11222;_	Antibiotics;-	Polyketides and nonribosomal peptides;-	-	-	-	-	HMDB0252665	Phenylpropanoids and polyketides	Macrolactams	Not Available	30562-34-6;_	578.302	2.12245	M+NH4	C29H40N2O9	0	68.7	metab_1393	pos_1394	pos	49.2	5.151	0.4033	4.538	0.02743
(1X,2X)-Guaiacylglycerol 3-Glucoside	0.008347	0.09315	2.0717	2.0562	1.1359	0.1838	yes	up	B(ii)	-	-	-	-	-	-	-	HMDB0040600	Lipids and lipid-like molecules	Fatty Acyls	Fatty acyl glycosides	7094-73-7	375.131	4.4885	M-H	C16H24O10	0	49.6	metab_18108	neg_6917	neg	47.3	4.983	0.2672	4.387	0.21
Cyclohexanecarboxylic Acid	4.327e-05	0.002662	2.0602	2.0665	1.0967	0.1331	yes	up	B(ii)	C09822	-	-	map01100;map00362;map01120	Metabolic pathways;Benzoate degradation;Microbial metabolism in diverse environments	Metabolism;Metabolism;Metabolism	Global and overview maps;Xenobiotics biodegradation and metabolism;Global and overview maps	HMDB0031342	Organic acids and derivatives	Carboxylic acids and derivatives	Carboxylic acids	98-89-5	255.16	6.21993	2M-H	C7H12O2	0	48.9	metab_14337	neg_3146	neg	48.5	5.774	0.07828	5.265	0.09216
5-(1-Benzyl-2,4-Dioxoquinazolin-3-Yl)-N-(Thiophen-2-Ylmethyl)Pentanamide	0.002767	0.04753	2.0271	2.0735	1.128	0.1738	yes	up	B(i)	-	-	-	-	-	-	-	-	-	-	-	-	448.174	3.00687	M+H	C25H25N3O3S	41.2	0	metab_1932	pos_1933	pos	42.5	5.004	0.1837	4.436	0.1934
4-Hydroxy-3-Methoxyphenylglycol Sulfate	0.02942	0.1889	2.0162	2.0091	1.1488	0.2002	yes	up	B(i)	-	-	-	-	-	-	-	HMDB0000559	Organic acids and derivatives	Organic sulfuric acids and derivatives	Arylsulfates	3415-67-6	245.012	4.27245	M-H2O-H	C9H12O7S	36.5	0	metab_18200	neg_7009	neg	44	4.956	0.1611	4.314	0.5028
2,8-Quinolinediol	0.008858	0.09584	1.9757	1.9599	1.1245	0.1693	yes	up	B(i)	C06342	-	-	-	-	-	-	HMDB0240311	Organoheterocyclic compounds	Quinolines and derivatives	Quinolones and derivatives	15450-76-7	162.055	3.38997	M+H	C9H7NO2	79.8	0	metab_2232	pos_2233	pos	53.6	4.914	0.2962	4.37	0.04147
13'-Carboxy-Alpha-Tocopherol	0.00453	0.0638	1.9627	1.9563	1.103	0.1415	yes	up	B(ii)	-	-	-	-	-	-	-	HMDB0012555	Lipids and lipid-like molecules	Prenol lipids	Quinone and hydroquinone lipids	_;	461.361	6.6602	M+H	C29H48O4	0	41.8	metab_4830	pos_4831	pos	43.7	5.578	0.2256	5.057	0.124
Gibberellin A29	0.009148	0.09788	1.9309	1.9826	1.1357	0.1836	yes	up	B(ii)	C06096;_	-	-	map00904	Diterpenoid biosynthesis	Metabolism	Metabolism of terpenoids and polyketides	HMDB0303458	Lipids and lipid-like molecules	Fatty Acyls	Fatty alcohol esters	-;_;	347.15	5.78692	M-H	C19H24O6	0	47.2	metab_17511	neg_6320	neg	46.3	4.677	0.09668	4.118	0.3392
Riboflavin	0.01408	0.1266	1.9157	1.9189	1.0951	0.1311	yes	up	B(i)	C00255;_	Vitamins and cofactors;-	Vitamins;-	map01100;map01110;map01240;map02010;map04977;map00740	Metabolic pathways;Biosynthesis of secondary metabolites;Biosynthesis of cofactors;ABC transporters;Vitamin digestion and absorption;Riboflavin metabolism	Metabolism;Metabolism;Metabolism;Environmental Information Processing;Organismal Systems;Metabolism	Global and overview maps;Global and overview maps;Global and overview maps;Membrane transport;Digestive system;Metabolism of cofactors and vitamins	HMDB0000244;HMDB0247501;PW_C000165	Organoheterocyclic compounds	Pteridines and derivatives	Alloxazines and isoalloxazines	83-88-5;_	377.145	3.9238	M+H	C17H20N4O6	96.8	0	metab_2588	pos_2589	pos	58.1	6.216	0.2845	5.676	0.1887
4-Hydroxycinnamoylagmatine	0.01648	0.1382	1.9115	1.9668	1.1518	0.204	yes	up	B(ii)	C04498	-	-	map01100;map01110;map00999	Metabolic pathways;Biosynthesis of secondary metabolites;Biosynthesis of various plant secondary metabolites	Metabolism;Metabolism;Metabolism	Global and overview maps;Global and overview maps;Biosynthesis of other secondary metabolites	HMDB0033460	Phenylpropanoids and polyketides	Cinnamic acids and derivatives	Hydroxycinnamic acids and derivatives	7295-86-5	275.15	5.78692	M-H	C14H20N4O2	0	59.6	metab_13743	neg_2552	neg	48	4.392	0.1198	3.813	0.3969
N-Benzyl-3-[(3-Propan-2-Yl-1,2,4-Oxadiazol-5-Yl)Methoxy]Piperidine-1-Carboxamide	0.003055	0.05067	1.9101	1.8901	1.1054	0.1445	yes	up	B(i)	-	-	-	-	-	-	-	-	-	-	-	-	359.21	3.094	M+H	C19H26N4O3	48.7	0	metab_9126	pos_9127	pos	47.4	4.993	0.07458	4.517	0.229
2-[(3,5-Difluorophenyl)Methylamino]-N,N-Diethylquinoxaline-6-Sulfonamide	0.006358	0.07951	1.8991	1.9008	1.1039	0.1426	yes	up	B(i)	-	-	-	-	-	-	-	-	-	-	-	-	407.136	4.66873	M+H	C19H20F2N4O2S	73.2	0	metab_2988	pos_2989	pos	51.3	5.312	0.2459	4.812	0.08417
N-Acetylmuramate	0.02252	0.1654	1.879	1.9104	1.1182	0.1611	yes	up	B(i)	C02713	Carbohydrates	Monosaccharides	map01100;map00520;map02060;map01250	Metabolic pathways;Amino sugar and nucleotide sugar metabolism;Phosphotransferase system (PTS);Biosynthesis of nucleotide sugars	Metabolism;Metabolism;Environmental Information Processing;Metabolism	Global and overview maps;Carbohydrate metabolism;Membrane transport;Global and overview maps	HMDB0060493	Organic oxygen compounds	Organooxygen compounds	Carbohydrates and carbohydrate conjugates	61633-75-8;_	276.107	2.60762	M+H-H2O	C11H19NO8	72	0	metab_9595	pos_9596	pos	52.2	5.327	0.3038	4.764	0.2649
Coffeasterene	0.03671	0.213	1.7995	1.7243	1.084	0.1163	yes	up	B(ii)	-	-	-	-	-	-	-	HMDB0033823	Lipids and lipid-like molecules	Steroids and steroid derivatives	Stigmastanes and derivatives	-	493.399	5.90957	M+CH3OH+Na	C31H50O	0	54.8	metab_7509	pos_7510	pos	48.6	6.286	0.3717	5.799	0.02743
5-Hydroxyindole-3-Acetic Acid	0.002309	0.04248	1.794	1.7792	1.0871	0.1205	yes	up	B(i)	C05635	-	-	map01100;map04726;map00380	Metabolic pathways;Serotonergic synapse;Tryptophan metabolism	Metabolism;Organismal Systems;Metabolism	Global and overview maps;Nervous system;Amino acid metabolism	HMDB0000763	Organoheterocyclic compounds	Indoles and derivatives	Indolyl carboxylic acids and derivatives	54-16-0	192.065	4.25308	M+H	C10H9NO3	92.6	0	metab_8374	pos_8375	pos	57.6	5.206	0.1637	4.789	0.07485
Dg(15:0/22:5(7Z,10Z,13Z,16Z,19Z)/0:0)	0.02264	0.1657	1.7662	1.7052	1.0811	0.1125	yes	up	B(ii)	_;C00165	-	-	map05214;map05167;map04650;map05163;map04750;map05235;map04015;map04014;map04659;map04540;map04010;map04012;map05022;map04370;map04371;map04072;map04071;map04975;map05143;map05012;map05231;map05146;map04919;map05200;map04961;map04745;map04921;map04920;map04923;map04925;map05017;map04625;map04929;map04726;map04725;map04724;map04723;map04722;map05223;map04720;map04666;map05170;map04664;map04658;map…	Glioma;Kaposi sarcoma-associated herpesvirus infection;Natural killer cell mediated cytotoxicity;Human cytomegalovirus infection;Inflammatory mediator regulation of TRP channels;PD-L1 expression and PD-1 checkpoint pathway in cancer;Rap1 signaling pathway;Ras signaling pathway;Th17 cell differentiation;Gap junction;MAPK signaling pathway;ErbB signaling pathway;Pathways of neurodegeneration - mult…	Human Diseases;Human Diseases;Organismal Systems;Human Diseases;Organismal Systems;Human Diseases;Environmental Information Processing;Environmental Information Processing;Organismal Systems;Cellular Processes;Environmental Information Processing;Environmental Information Processing;Human Diseases;Environmental Information Processing;Environmental Information Processing;Environmental Information …	Cancer: specific types;Infectious disease: viral;Immune system;Infectious disease: viral;Sensory system;Cancer: overview;Signal transduction;Signal transduction;Immune system;Cellular community - eukaryotes;Signal transduction;Signal transduction;Neurodegenerative disease;Signal transduction;Signal transduction;Signal transduction;Signal transduction;Digestive system;Infectious disease: parasitic…	HMDB0007091	Lipids and lipid-like molecules	Glycerolipids	Diradylglycerols	-	593.499	5.55085	M+H-2H2O	C40H68O5	0	52.7	metab_3411	pos_3412	pos	46.3	5.986	0.3034	5.537	0.02743
Penmacric Acid	0.04689	0.2403	1.7468	1.6796	1.1232	0.1676	yes	up	B(ii)	-	-	-	-	-	-	-	HMDB0029436	Organic acids and derivatives	Carboxylic acids and derivatives	Amino acids, peptides, and analogues	55297-13-7	167.045	2.99125	M+H-2H2O	C7H10N2O5	0	45.4	metab_9213	pos_9214	pos	47.5	4.349	0.2951	3.872	0.2959
3A,7A,12A-Trihydroxy-5B-Cholestan-26-Al	0.002118	0.04004	1.7459	1.7288	1.0735	0.1023	yes	up	B(ii)	C01301	-	-	map01100;map00120	Metabolic pathways;Primary bile acid biosynthesis	Metabolism;Metabolism	Global and overview maps;Lipid metabolism	HMDB0003533	Lipids and lipid-like molecules	Steroids and steroid derivatives	Bile acids, alcohols and derivatives	3836-01-09	433.332	6.61982	M-H	C27H46O4	0	52.3	metab_16422	neg_5231	neg	48.6	5.698	0.07614	5.308	0.1657
Palmitoylethanolamide	0.003763	0.057	1.7386	1.7642	1.0827	0.1146	yes	up	B(ii)	C16512	-	-	map04080	Neuroactive ligand-receptor interaction	Environmental Information Processing	Signaling molecules and interaction	HMDB0002100	Organic acids and derivatives	Carboximidic acids and derivatives	Carboximidic acids	544-31-0	304.263	6.1033	M+Na-H2O	C18H37NO2	0	59.5	metab_3888	pos_3889	pos	48.2	5.488	0.1854	5.069	0.06639
Apitolisib	0.0274	0.1822	1.7219	1.7773	1.1275	0.1731	yes	up	B(ii)	-	-	-	-	-	-	-	HMDB0248513	Organoheterocyclic compounds	Thienopyrimidines	Not Available	-	531.249	2.61543	M+CH3OH+H	C23H30N8O3S	0	83.7	metab_1537	pos_1538	pos	54.4	4.404	0.2703	3.906	0.263
Prolylproline	0.001624	0.03383	1.6928	1.6893	1.077	0.107	yes	up	B(i)	-	-	-	-	-	-	-	HMDB0011180	Organic acids and derivatives	Carboxylic acids and derivatives	Amino acids, peptides, and analogues	20488-28-2	425.238	2.72475	2M+H	C10H16N2O3	38.4	0	metab_9449	pos_9450	pos	45.9	5.176	0.118	4.806	0.1008
4-Coumaroyl-2-Hydroxyputrescine	0.005299	0.07043	1.6896	1.7035	1.073	0.1016	yes	up	B(ii)	-	-	-	-	-	-	-	HMDB0033462	Phenylpropanoids and polyketides	Cinnamic acids and derivatives	Hydroxycinnamic acids and derivatives	24177-22-8	273.123	5.34017	M+Na	C13H18N2O3	0	42	metab_3297	pos_3298	pos	46.4	5.839	0.1649	5.442	0.1239
Corosin	0.001343	0.03004	1.6652	1.6596	1.0651	0.0909	yes	up	B(ii)	-	-	-	-	-	-	-	HMDB0035699	Lipids and lipid-like molecules	Prenol lipids	Triterpenoids	53527-49-4	582.341	6.4595	M+ACN+Na	C30H46O7	0	42.5	metab_6556	pos_6557	pos	46.6	5.795	0.05397	5.441	0.144
N-Acetyl-7-O-Acetylneuraminic Acid	0.007004	0.0847	1.6347	1.6352	1.0764	0.1062	yes	up	B(ii)	C04016	-	-	-	-	-	-	HMDB0000785	Organic oxygen compounds	Organooxygen compounds	Carbohydrates and carbohydrate conjugates	18529-63-0	352.123	1.31048	M+H	C13H21NO10	0	47.4	metab_1026	pos_1027	pos	46.3	5.257	0.1873	4.884	0.06461
4-Methylpyrimidine	0.002453	0.04422	1.6174	1.5967	1.0661	0.0923	yes	up	B(i)	-	-	-	-	-	-	-	-	-	-	-	-	95.0607	0.728	M+H	C5H6N2	81	0	metab_692	pos_693	pos	54.6	5.421	0.1038	5.085	0.1147
D-4'-Phosphopantothenate	0.03586	0.2104	1.5834	1.6275	1.096	0.1322	yes	up	B(ii)	C03492	-	-	map01100;map00770;map00410;map01240	Metabolic pathways;Pantothenate and CoA biosynthesis;beta-Alanine metabolism;Biosynthesis of cofactors	Metabolism;Metabolism;Metabolism;Metabolism	Global and overview maps;Metabolism of cofactors and vitamins;Metabolism of other amino acids;Global and overview maps	HMDB0001016	Organic acids and derivatives	Carboxylic acids and derivatives	Amino acids, peptides, and analogues	-;5875-50-3;_	344.076	2.04723	M+FA-H	C9H18NO8P	0	63.8	metab_12294	neg_1103	neg	51.5	4.933	0.2617	4.501	0.2299
Phenylpropionylglycine	9.296e-05	0.004433	1.5743	1.5768	1.0707	0.0985	yes	up	B(i)	-	-	-	-	-	-	-	HMDB0000860	Organic acids and derivatives	Carboxylic acids and derivatives	Amino acids, peptides, and analogues	56613-60-6	271.107	4.03362	M+ACN+Na	C11H13NO3	44.8	0	metab_8485	pos_8486	pos	45.7	4.531	0.0701	4.232	0.02767
3-Methyldioxyindole	0.0002488	0.009103	1.5691	1.5812	1.0717	0.0999	yes	up	B(ii)	C05834	-	-	map00380	Tryptophan metabolism	Metabolism	Amino acid metabolism	HMDB0004186	Organoheterocyclic compounds	Indoles and derivatives	Indolines	-;3040-34-4	181.097	4.03362	M+NH4	C9H9NO2	0	41.2	metab_2640	pos_2641	pos	46.2	4.587	0.0711	4.28	0.06123
3-Amino-2-Methoxynonadec-5-En-4-Ol	0.02246	0.1651	1.5576	1.6043	1.0816	0.1132	yes	up	B(ii)	-	-	-	-	-	-	-	HMDB0257752	Organic oxygen compounds	Organooxygen compounds	Alcohols and polyols	-	382.331	6.62943	M+CH3OH+Na	C20H41NO2	0	48.8	metab_4789	pos_4790	pos	47	5.276	0.1624	4.878	0.2472
Valactamide E	0.01309	0.1213	1.5542	1.5627	1.0617	0.0863	yes	up	B(i)	-	-	-	-	-	-	-	-	-	-	-	-	425.337	6.36647	M+H	C24H44N2O4	41.1	0	metab_6715	pos_6716	pos	45.2	6.146	0.202	5.789	0.08021
3-Pyridinamine	0.0009417	0.02349	1.5531	1.5407	1.0559	0.0785	yes	up	B(i)	-	-	-	-	-	-	-	-	-	-	-	-	95.0607	0.944533	M+H	C5H6N2	59.9	0	metab_10315	pos_10316	pos	50.8	5.701	0.07288	5.399	0.09332
Isoleucyl-Tryptophan	0.001338	0.03	1.5514	1.5323	1.057	0.08	yes	up	B(ii)	-	-	-	-	-	-	-	HMDB0028918	Organic acids and derivatives	Carboxylic acids and derivatives	Amino acids, peptides, and analogues	-	359.21	2.92037	M+ACN+H	C17H23N3O3	0	56.4	metab_1852	pos_1853	pos	45.2	5.596	0.03473	5.294	0.1276
(2R,3S,4S,5R,6S)-2-(Hydroxymethyl)-6-[4-(3-Hydroxyprop-1-Enyl)-2,6-Dimethoxyphenoxy]Oxane-3,4,5-Triol	0.004835	0.06638	1.5384	1.5618	1.0634	0.0887	yes	up	B(ii)	-	-	-	-	-	-	-	HMDB0242525	Organic oxygen compounds	Organooxygen compounds	Carbohydrates and carbohydrate conjugates	-	436.155	0.643683	M+ACN+Na	C17H24O9	0	68.7	metab_10631	pos_10632	pos	49.7	5.583	0.0617	5.25	0.1723
Bisacurone B	0.01099	0.11	1.5367	1.5452	1.0825	0.1143	yes	up	B(ii)	-	-	-	-	-	-	-	HMDB0038502	Lipids and lipid-like molecules	Prenol lipids	Sesquiterpenoids	127214-85-1	273.145	4.71228	M+Na-2H	C15H24O3	0	52.6	metab_13241	neg_2050	neg	45.9	4.529	0.1741	4.184	0.1096
Enterodiol	0.02109	0.1591	1.5324	1.5682	1.0899	0.1242	yes	up	B(i)	C18166	-	-	-	-	-	-	HMDB0005056	Lignans, neolignans and related compounds	Dibenzylbutane lignans	Dibenzylbutanediol lignans	80226-00-2	301.144	5.78692	M-H	C18H22O4	53.1	0	metab_13744	neg_2553	neg	47.8	4.559	0.1706	4.183	0.212
1-[3-[3-(Dimethylamino)Pyrazin-2-Yl]Oxypyrrolidin-1-Yl]-2-Methoxyethanone	0.006436	0.08	1.5207	1.563	1.0712	0.0993	yes	up	B(i)	-	-	-	-	-	-	-	-	-	-	-	-	281.16	2.59177	M+H	C13H20N4O3	77.4	0	metab_1529	pos_1530	pos	52.2	5.083	0.1083	4.745	0.1574
2-Aminoheptanedioic Acid	0.001336	0.03	1.5129	1.5104	1.0583	0.0817	yes	up	B(i)	-	-	-	-	-	-	-	HMDB0034252	Organic acids and derivatives	Carboxylic acids and derivatives	Amino acids, peptides, and analogues	3721-85-5	176.092	1.0302	M+H	C7H13NO4	69.6	0	metab_10233	pos_10234	pos	52.1	5.341	0.1107	5.047	0.02302
Artecanin	0.04773	0.243	1.5092	1.4841	1.0941	0.1297	yes	up	B(ii)	C09302;C09354	-	-	-	-	-	-	HMDB0302700	Lipids and lipid-like molecules	Prenol lipids	Terpene lactones	29431-84-3;_	277.108	5.74693	M-H	C15H18O5	0	64.7	metab_13723	neg_2532	neg	49.5	4.36	0.2348	3.985	0.2315
1-Hydroxyacorenone	0.01607	0.1362	1.5061	1.4818	1.0706	0.0984	yes	up	B(ii)	-	-	-	-	-	-	-	HMDB0030917	Organic oxygen compounds	Organooxygen compounds	Carbonyl compounds	185154-98-7	271.134	6.0598	M+Na-2H	C15H22O3	0	41.9	metab_17179	neg_5988	neg	44	4.961	0.2033	4.634	0.02136
Beta-Tocotrienol	0.003429	0.05399	1.5017	1.464	1.053	0.0745	yes	up	B(ii)	C14154	-	-	map01100;map00130;map01110	Metabolic pathways;Ubiquinone and other terpenoid-quinone biosynthesis;Biosynthesis of secondary metabolites	Metabolism;Metabolism;Metabolism	Global and overview maps;Metabolism of cofactors and vitamins;Global and overview maps	HMDB0304597	Lipids and lipid-like molecules	Prenol lipids	Quinone and hydroquinone lipids	490-23-3;_;	455.316	6.41942	M+FA-H	C28H42O2	0	54.9	metab_16619	neg_5428	neg	48.7	5.7	0.08092	5.413	0.1184

## Sheet: down_CG_vs_SG
Metabolite	P_value	FDR	VIP_pred_OPLS-DA	VIP_PLS-DA	FC(control/Sham)	Log2FC(control/Sham)	Significant	Regulate	level	KEGG Compound ID	KEGG Compound First Category	KEGG Compound Second Category	KEGG Pathway ID	KEGG Pathway Description	KEGG Pathway First Category	KEGG Pathway Second Category	Library ID	HMDB Superclass	HMDB Class	HMDB Subclass	CAS ID	M/Z	Retention time	Adducts	Formula	Fragmentation Score	Theoretical Fragmentation Score	Metab ID	ID	Mode	Score	control_mean	control_SD	sham_mean	sham_SD
6-Chloro-N-(2-Methylphenyl)-2-(4-Methylphenyl)Imidazo[1,2-A]Pyridin-3-Amine	0.0002359	0.008729	5.4339	5.4678	0.3495	-1.5166	yes	down	B(i)	-	-	-	-	-	-	-	-	-	-	-	-	348.13	3.48425	M+H	C21H18ClN3	43.3	0	metab_2293	pos_2294	pos	39.5	1.965	1.047	5.622	0.05061
Pyributicarb	1.51e-07	4.755e-05	5.1055	5.0997	0.4708	-1.0869	yes	down	B(i)	C18422	-	-	-	-	-	-	-	-	-	-	88678-67-5	348.176	0.999067	M+NH4	C18H22N2O2S	76.1	0	metab_10282	pos_10283	pos	49.7	2.666	0.2745	5.663	0.08721
1-(3-Chlorophenyl)-3-(4-Hydroxy-1-Methylimidazol-2-Yl)Urea	1.466e-10	4.708e-07	4.6224	4.604	0.5219	-0.9382	yes	down	B(ii)	-	-	-	-	-	-	-	HMDB0260231	Benzenoids	Benzene and substituted derivatives	N-phenylureas	-	287.034	3.08948	M+Na-2H	C11H11ClN4O2	0	65.3	metab_12425	neg_1234	neg	45	2.648	0.02232	5.074	0.09472
Glu Met Tyr	0.0001197	0.005315	4.3669	4.3429	0.5483	-0.867	yes	down	B(i)	-	-	-	-	-	-	-	-	-	-	-	-	442.163	3.74365	M+H	C19H27N3O7S	53	0	metab_8652	pos_8653	pos	45.9	2.77	0.574	5.052	0.1425
2-Chloro-N-[2-(1-Ethylpyrrolo[2,3-B]Pyridin-3-Yl)Ethyl]-5-Fluorobenzamide	7.502e-07	0.0001392	4.3499	4.3493	0.5763	-0.795	yes	down	B(i)	-	-	-	-	-	-	-	-	-	-	-	-	346.114	2.87352	M+H	C18H17ClFN3O	79	0	metab_1810	pos_1811	pos	47.3	2.978	0.2321	5.167	0.1417
Salidroside	0.01556	0.1338	4.2442	4.1059	0.5245	-0.931	yes	down	B(ii)	C06046;_	-	-	map01100;map00350	Metabolic pathways;Tyrosine metabolism	Metabolism;Metabolism	Global and overview maps;Amino acid metabolism	HMDB0257463	Organic oxygen compounds	Organooxygen compounds	Carbohydrates and carbohydrate conjugates	10338-51-9;_	335.088	3.37603	M+Cl	C14H20O7	0	40.8	metab_18669	neg_7478	neg	45.4	2.762	1.554	5.266	0.06762
Ser Cys Arg	1.035e-05	0.0009334	4.1141	4.121	0.6504	-0.6206	yes	down	B(i)	-	-	-	-	-	-	-	-	-	-	-	-	365.156	3.48425	M+H	C12H24N6O5S	39.2	0	metab_2295	pos_2296	pos	44.2	3.71	0.3495	5.704	0.05327
Queuine	2.482e-07	6.428e-05	4.045	4.0252	0.6076	-0.7189	yes	down	B(ii)	C01449	-	-	-	-	-	-	HMDB0001495	Organoheterocyclic compounds	Pyrrolopyrimidines	Pyrrolo[2,3-d]pyrimidines	72496-59-4	276.109	4.71882	M-H	C12H15N5O3	0	47.9	metab_18013	neg_6822	neg	45.8	2.895	0.08837	4.765	0.1953
4-Androsten-3Beta,17Beta-Diol 17-Sulfate	3.639e-09	2.922e-06	4.0397	4.0298	0.6138	-0.7041	yes	down	B(ii)	-	-	-	-	-	-	-	HMDB0240429	Lipids and lipid-like molecules	Steroids and steroid derivatives	Sulfated steroids	102287-51-4	415.183	3.4563	M+FA-H	C19H30O5S	0	81.3	metab_12620	neg_1429	neg	50.8	2.958	0.04848	4.819	0.1054
Goshonoside F6	5.747e-05	0.003273	3.7211	3.7423	0.6851	-0.5456	yes	down	B(ii)	-	-	-	-	-	-	-	HMDB0038542	Lipids and lipid-like molecules	Prenol lipids	Terpene glycosides	138614-60-5	621.327	5.82385	M+Na-H2O	C31H52O12	0	57.7	metab_7583	pos_7584	pos	47.8	3.644	0.3724	5.319	0.1095
Imazapyr	3.181e-08	1.335e-05	3.6884	3.6716	0.7117	-0.4906	yes	down	B(i)	C18864	-	-	-	-	-	-	HMDB0253405	Organic acids and derivatives	Carboxylic acids and derivatives	Amino acids, peptides, and analogues	81334-34-1;_	260.104	4.05492	M-H	C13H15N3O3	42.4	0	metab_12952	neg_1761	neg	46.8	3.827	0.09975	5.377	0.07174
Asparaginylarginine	2.362e-05	0.001748	3.5696	3.5516	0.7008	-0.5128	yes	down	B(ii)	-	-	-	-	-	-	-	HMDB0028725	Organic acids and derivatives	Carboxylic acids and derivatives	Amino acids, peptides, and analogues	2478-01-05	306.19	5.66008	M+NH4	C10H20N6O4	0	48.5	metab_7670	pos_7671	pos	45.5	3.5	0.267	4.994	0.1553
(2-Ethoxy-2-Oxoethyl) 2-(3-Fluorophenyl)-1-Oxoisoquinoline-4-Carboxylate	0.0002634	0.009381	3.5431	3.5721	0.6946	-0.5258	yes	down	B(i)	-	-	-	-	-	-	-	-	-	-	-	-	370.112	3.48425	M+H	C20H16FNO5	73.2	0	metab_8832	pos_8833	pos	49.8	3.552	0.4542	5.114	0.04586
(2S,3S,4R,5R)-5-(6-Aminopurin-9-Yl)-N-Cyclopropyl-3,4-Dihydroxyoxolane-2-Carboxamide	1.13e-05	0.0009808	3.4097	3.4089	0.7593	-0.3972	yes	down	B(ii)	-	-	-	-	-	-	-	HMDB0242669	Nucleosides, nucleotides, and analogues	Purine nucleosides	Not Available	-	321.129	0.6897	M+H	C13H16N6O4	0	59.2	metab_10568	pos_10569	pos	47.7	4.31	0.2323	5.676	0.08811
Swertiamarin	0.003421	0.05392	3.3876	3.3979	0.684	-0.5478	yes	down	B(ii)	C09800;_	-	-	-	-	-	-	HMDB0258644	Organic oxygen compounds	Organooxygen compounds	Carbohydrates and carbohydrate conjugates	17388-39-5;_	419.119	2.03925	M+FA-H	C16H22O10	0	93.9	metab_12251	neg_1060	neg	56.8	3.345	0.6002	4.89	0.4234
Molinate	5.195e-05	0.003067	3.3505	3.3229	0.7402	-0.434	yes	down	B(ii)	C11086;_	-	-	-	-	-	-	HMDB0254835	Organic nitrogen compounds	Organonitrogen compounds	Amines	2212-67-1;_	359.124	2.00732	M+FA-H	C13H14N8O2	0	48.5	metab_19106	neg_7915	neg	47.2	3.758	0.2748	5.077	0.1332
Phaseic Acid	7.746e-07	0.0001392	3.3297	3.3037	0.7232	-0.4675	yes	down	B(ii)	C09707;_	-	-	map00906	Carotenoid biosynthesis	Metabolism	Metabolism of terpenoids and polyketides	HMDB0302844	Lipids and lipid-like molecules	Prenol lipids	Sesquiterpenoids	24394-14-7;_	301.108	5.75493	M+Na-2H	C15H20O5	0	46.3	metab_13727	neg_2536	neg	45.6	3.303	0.02293	4.567	0.1739
Procaine	0.0002918	0.0101	3.3005	3.3143	0.7902	-0.3397	yes	down	B(ii)	C07375	-	-	-	-	-	-	HMDB0014859	Benzenoids	Benzene and substituted derivatives	Benzoic acids and derivatives	59-46-1	237.159	2.88913	M+H	C13H20N2O2	0	57.6	metab_1816	pos_1817	pos	50.6	5.093	0.2075	6.445	0.3964
3-Hydroxybutyrylcarnitine	0.0002482	0.009101	3.2938	3.2548	0.7186	-0.4766	yes	down	B(ii)	-	-	-	-	-	-	-	HMDB0013127	Lipids and lipid-like molecules	Fatty Acyls	Fatty acid esters	1469900-92-2;	282.109	5.47418	M+Cl	C11H21NO5	0	59	metab_13612	neg_2421	neg	47.3	3.318	0.3068	4.617	0.25
2,2-Dimethylpropanoyloxymethyl (4R,5S,6S)-6-[(1R)-1-Hydroxyethyl]-4-Methyl-7-Oxo-3-[(3R)-5-Oxopyrrolidin-3-Yl]Sulfanyl-1-Azabicyclo[3.2.0]Hept-2-Ene-2-Carboxylate	2.917e-10	6.692e-07	3.2211	3.2131	0.7636	-0.389	yes	down	B(ii)	-	-	-	-	-	-	-	HMDB0250554	Organoheterocyclic compounds	Lactams	Beta lactams	-	458.195	5.69127	M+NH4	C20H28N2O7S	0	41.9	metab_3468	pos_3469	pos	43.8	3.819	0.01442	5.001	0.05007
(3S)-N,4-Bis[(4-Fluorophenyl)Methyl]-5-Oxomorpholine-3-Carboxamide	3.285e-05	0.002162	3.1751	3.1437	0.7726	-0.3722	yes	down	B(i)	-	-	-	-	-	-	-	-	-	-	-	-	361.139	2.00452	M+H	C19H18F2N2O3	55.1	0	metab_9961	pos_9962	pos	46.6	3.992	0.1915	5.167	0.1806
(R)-8-Acetoxycarvotanacetone	1.15e-06	0.0001945	3.1606	3.1548	0.7719	-0.3734	yes	down	B(ii)	-	-	-	-	-	-	-	HMDB0037104	Lipids and lipid-like molecules	Prenol lipids	Monoterpenoids	56691-69-1	255.123	4.07045	M+FA-H	C12H18O3	0	46	metab_18295	neg_7104	neg	47.6	3.906	0.1039	5.06	0.1206
2-Acetyl-3-Methylpyrazine	0.007903	0.09008	3.063	2.9639	0.7141	-0.4859	yes	down	B(ii)	-	-	-	-	-	-	-	HMDB0030001	Organic oxygen compounds	Organooxygen compounds	Carbonyl compounds	23787-80-6	181.061	4.68668	M+FA-H	C7H8N2O	0	41.7	metab_13224	neg_2033	neg	45.9	3.089	0.6547	4.326	0.1248
Prostaglandin A1	6.638e-05	0.003566	3.0172	2.9891	0.805	-0.313	yes	down	B(i)	C04685	Lipids	Eicosanoids	-	-	-	-	HMDB0002656	Lipids and lipid-like molecules	Fatty Acyls	Eicosanoids	14152-28-4	381.228	5.40267	M+FA-H	C20H32O4	35.5	0	metab_17711	neg_6520	neg	45.3	4.42	0.2457	5.491	0.06078
P-Cresol	0.0004033	0.01275	3.0079	3.0057	0.7585	-0.3988	yes	down	B(ii)	C01468	-	-	map01100;map01220;map00633;map01120;map00623;map04974	Metabolic pathways;Degradation of aromatic compounds;Nitrotoluene degradation;Microbial metabolism in diverse environments;Toluene degradation;Protein digestion and absorption	Metabolism;Metabolism;Metabolism;Metabolism;Metabolism;Organismal Systems	Global and overview maps;Global and overview maps;Xenobiotics biodegradation and metabolism;Global and overview maps;Xenobiotics biodegradation and metabolism;Digestive system	HMDB0001858	Benzenoids	Phenols	Cresols	106-44-5	153.055	5.93157	M+FA-H	C7H8O	0	24.9	metab_17391	neg_6200	neg	41.7	3.517	0.2448	4.637	0.2897
(5Xi,9Xi)-17-Hydroxykaur-15-En-19-Oic Acid	0.000136	0.005695	2.998	2.9781	0.7941	-0.3327	yes	down	B(i)	-	-	-	-	-	-	-	-	-	-	-	-	363.218	6.05185	M+FA-H	C20H30O3	51.2	0	metab_14055	neg_2864	neg	47.8	4.145	0.2122	5.22	0.2148
Seryllysine	5.579e-07	0.0001195	2.9544	2.9483	0.8386	-0.254	yes	down	B(ii)	-	-	-	-	-	-	-	HMDB0029044	Organic acids and derivatives	Carboxylic acids and derivatives	Amino acids, peptides, and analogues	22677-61-8	256.129	1.2326	M+Na	C9H19N3O4	0	61.4	metab_1002	pos_1003	pos	49.6	5.226	0.08318	6.232	0.09248
17-Dimethylaminogeldanamycin	5.018e-05	0.00298	2.9238	2.9363	0.8335	-0.2627	yes	down	B(ii)	-	-	-	-	-	-	-	HMDB0244766	Phenylpropanoids and polyketides	Macrolactams	Not Available	-	621.327	5.66008	M+Na-H2O	C32H48N4O8	0	93.2	metab_3459	pos_3460	pos	56.4	5.157	0.2088	6.187	0.1151
Sakuranetin	0.001723	0.03525	2.8826	2.8693	0.7621	-0.392	yes	down	B(ii)	C09833	-	-	map00941;map01110	Flavonoid biosynthesis;Biosynthesis of secondary metabolites	Metabolism;Metabolism	Biosynthesis of other secondary metabolites;Global and overview maps	HMDB0030090	Phenylpropanoids and polyketides	Flavonoids	O-methylated flavonoids	2957-21-3;	304.117	5.6523	M+NH4	C16H14O5	0	65.1	metab_7675	pos_7676	pos	49.1	3.411	0.3207	4.476	0.3255
Gamma-Glutamylhydroxyproline	9.344e-05	0.004433	2.8609	2.8729	0.8197	-0.2867	yes	down	B(ii)	-	-	-	-	-	-	-	HMDB0029150	Organic acids and derivatives	Carboxylic acids and derivatives	Amino acids, peptides, and analogues	1801529-32-7	319.114	0.7038	M+Hac-H	C10H16N2O6	0	71.6	metab_19501	neg_8310	neg	52.5	4.516	0.229	5.509	0.1024
Pentanoic Acid, 5-(Dipentylamino)-5-Oxo-4-((3-Quinolinylcarbonyl)Amino)-, (R)-	0.02412	0.1706	2.8143	2.8421	0.7597	-0.3965	yes	down	B(ii)	-	-	-	-	-	-	-	HMDB0247713	Organic acids and derivatives	Carboxylic acids and derivatives	Amino acids, peptides, and analogues	-	442.269	4.49698	M+H	C25H35N3O4	0	40.7	metab_8228	pos_8229	pos	46.5	3.971	0.558	5.227	0.762
Cis-3-Hexenyl 2-Aminobenzoate	0.0008802	0.02251	2.7492	2.7798	0.8132	-0.2983	yes	down	B(ii)	-	-	-	-	-	-	-	HMDB0037694	Benzenoids	Benzene and substituted derivatives	Benzoic acids and derivatives	65405-76-7	220.133	2.88913	M+H	C13H17NO2	0	40.4	metab_1815	pos_1816	pos	46.1	4.267	0.117	5.247	0.3802
Mevalonic Acid	7.802e-07	0.0001392	2.6798	2.6704	0.8629	-0.2128	yes	down	B(i)	C00418	-	-	map01100;map01110;map04216;map00900;map01070;map01062;map01060	Metabolic pathways;Biosynthesis of secondary metabolites;Ferroptosis;Terpenoid backbone biosynthesis;Biosynthesis of plant hormones;Biosynthesis of terpenoids and steroids;Biosynthesis of plant secondary metabolites	Metabolism;Metabolism;Cellular Processes;Metabolism;Metabolism;Metabolism;Metabolism	Global and overview maps;Global and overview maps;Cell growth and death;Metabolism of terpenoids and polyketides;Chemical structure transformation maps;Chemical structure transformation maps;Chemical structure transformation maps	HMDB0000227;LMFA01050352;PW_C000152	Lipids and lipid-like molecules	Fatty Acyls	Fatty acids and conjugates	17817-88-8;;150-97-0	147.065	2.2655	M-H	C6H12O4	58	0	metab_18902	neg_7711	neg	49.7	5.198	0.05913	6.024	0.09261
Glycylprolylhydroxyproline	7.924e-06	0.0007575	2.6527	2.6306	0.8419	-0.2482	yes	down	B(ii)	-	-	-	-	-	-	-	HMDB0002171	Organic acids and derivatives	Carboxylic acids and derivatives	Amino acids, peptides, and analogues	2239-67-0	344.146	4.00637	M+Hac-H	C12H19N3O5	0	54.5	metab_12911	neg_1720	neg	48.2	4.32	0.08768	5.131	0.1227
Aconitic Acid	0.01569	0.1343	2.6014	2.5995	0.7858	-0.3478	yes	down	B(i)	-	-	-	-	-	-	-	HMDB0247961	Organic acids and derivatives	Carboxylic acids and derivatives	Tricarboxylic acids and derivatives	-	173.008	0.8005	M-H	C6H6O6	50.8	0	metab_11926	neg_735	neg	48.4	3.668	0.2054	4.668	0.6782
N-(3-Hydroxypropyl)Valine	3.501e-07	8.392e-05	2.5576	2.5435	0.8666	-0.2065	yes	down	B(ii)	-	-	-	-	-	-	-	HMDB0255001	Organic acids and derivatives	Carboxylic acids and derivatives	Amino acids, peptides, and analogues	-	176.128	1.67692	M+H	C8H17NO3	0	47.2	metab_10030	pos_10031	pos	48	4.854	0.07082	5.601	0.04339
Hexahydro-4-Methylphthalic Anhydride	0.001104	0.02631	2.5	2.4809	0.8475	-0.2387	yes	down	B(ii)	-	-	-	-	-	-	-	HMDB0244846	Organoheterocyclic compounds	Isobenzofurans	Not Available	-	167.071	6.0598	M-H	C9H12O3	0	42.8	metab_17184	neg_5993	neg	46.5	4.362	0.25	5.147	0.1724
2-Oxoarginine	0.002493	0.04466	2.4961	2.4686	0.828	-0.2723	yes	down	B(ii)	C03771	-	-	map01100;map00470;map00330	Metabolic pathways;D-Amino acid metabolism;Arginine and proline metabolism	Metabolism;Metabolism;Metabolism	Global and overview maps;Metabolism of other amino acids;Amino acid metabolism	HMDB0004225	Organic acids and derivatives	Keto acids and derivatives	Short-chain keto acids and derivatives	3715/10/4;3715-10-4	154.061	4.38117	M-H2O-H	C6H11N3O3	0	42.6	metab_13099	neg_1908	neg	46.1	3.871	0.032	4.675	0.3965
Proscillaridin	0.0005666	0.01679	2.4801	2.4604	0.8704	-0.2003	yes	down	B(ii)	C12816;_	Steroids;-	24-Carbon atoms;-	-	-	-	-	HMDB0256851	Lipids and lipid-like molecules	Steroids and steroid derivatives	Steroid lactones	466-06-8;_	589.303	5.86693	M+Hac-H	C30H42O8	0	70.6	metab_17457	neg_6266	neg	52	5.083	0.2131	5.84	0.1523
Caudatin	0.01094	0.1096	2.469	2.5103	0.8356	-0.2591	yes	down	B(ii)	-	-	-	-	-	-	-	HMDB0249707	Lipids and lipid-like molecules	Steroids and steroid derivatives	Pregnane steroids	-	545.308	3.93225	M+CH3OH+Na	C28H42O7	0	47.2	metab_2597	pos_2598	pos	47.3	4.62	0.3822	5.529	0.4102
(R)-6'-O-(4-Geranyloxy-2-Hydroxycinnamoyl)-Marmin	0.0009784	0.02417	2.4594	2.4724	0.8716	-0.1983	yes	down	B(ii)	-	-	-	-	-	-	-	HMDB0039061	Lipids and lipid-like molecules	Prenol lipids	Terpene lactones	142628-36-2	613.322	3.55512	M+H-H2O	C38H46O8	0	45.7	metab_8785	pos_8786	pos	44.8	5.273	0.2603	6.05	0.1261
Leucinic Acid	0.01988	0.1532	2.4429	2.4658	0.7868	-0.346	yes	down	B(i)	-	-	-	-	-	-	-	HMDB0000665;LMFA01050381	Lipids and lipid-like molecules	Fatty Acyls	Fatty acids and conjugates	498-36-2;	177.076	5.18855	M+FA-H	C6H12O3	84.6	0	metab_13462	neg_2271	neg	54.1	3.413	0.5678	4.338	0.2499
2-Hydroxy-4-(Methylthio)Butyric Acid	6.142e-05	0.003431	2.4311	2.4275	0.8816	-0.1818	yes	down	B(i)	-	-	-	-	-	-	-	HMDB0037115	Lipids and lipid-like molecules	Fatty Acyls	Fatty acids and conjugates	120-91-2	149.027	3.65382	M-H	C5H10O3S	39.7	0	metab_12719	neg_1528	neg	45.3	5.248	0.1561	5.953	0.0565
7-[(1R,2R,5S)-5-Hydroxy-2-[(1E,3S)-3-Hydroxyoct-1-En-1-Yl]-3-Oxocyclopentyl]Heptanoylcarnitine	0.02205	0.1631	2.424	2.4021	0.8254	-0.2769	yes	down	B(ii)	-	-	-	-	-	-	-	HMDB0241888	Lipids and lipid-like molecules	Fatty Acyls	Eicosanoids	-	530.368	5.98747	M+CH3OH+H	C27H47NO7	0	55.4	metab_7405	pos_7406	pos	48.9	4.202	0.2854	5.091	0.6073
2,3-Dihydro-5-(5-Methyl-2-Furanyl)-1H-Pyrrolizine	9.357e-05	0.004433	2.423	2.4111	0.8613	-0.2155	yes	down	B(ii)	-	-	-	-	-	-	-	HMDB0040012	Organoheterocyclic compounds	Pyrrolizines	Not Available	-	188.107	3.23278	M+H	C12H13NO	0	41.6	metab_2114	pos_2115	pos	46.3	4.339	0.1066	5.038	0.1574
D-Pantothenoyl-L-Cysteine	0.0005067	0.01535	2.4227	2.3868	0.855	-0.226	yes	down	B(ii)	C04079	-	-	map00770	Pantothenate and CoA biosynthesis	Metabolism	Metabolism of cofactors and vitamins	HMDB0006834	Organic acids and derivatives	Peptidomimetics	Hybrid peptides	-;_	345.111	3.5948	M+Na	C12H22N2O6S	0	50.5	metab_2366	pos_2367	pos	46.3	4.187	0.2161	4.897	0.09414
Eucarvone	0.0007801	0.02054	2.4149	2.3982	0.8503	-0.2339	yes	down	B(ii)	C16955	-	-	-	-	-	-	HMDB0302916	Lipids and lipid-like molecules	Prenol lipids	Monoterpenoids	503-93-5;_	195.102	6.23588	M+FA-H	C10H14O	0	53.2	metab_16889	neg_5698	neg	48.1	4.124	0.1753	4.85	0.2114
2-Methoxy-4-Methylphenol	2.163e-06	0.000287	2.3771	2.3545	0.9	-0.152	yes	down	B(i)	-	-	-	-	-	-	-	HMDB0032136	Benzenoids	Phenols	Methoxyphenols	93-51-6	137.06	4.01493	M-H	C8H10O2	68.2	0	metab_18342	neg_7151	neg	51.9	5.804	0.0742	6.449	0.05955
16-Acetylpriverogenin A	0.04862	0.2466	2.3346	2.2958	0.84	-0.2516	yes	down	B(ii)	-	-	-	-	-	-	-	HMDB0034529	Lipids and lipid-like molecules	Prenol lipids	Triterpenoids	26339-85-5	479.347	6.00302	M+H-2H2O, M+	C32H50O5	0	76.4	metab_11184	pos_11185	pos	50.6	4.714	0.3761	5.612	0.7394
Enalaprilat	0.01433	0.1276	2.3331	2.3152	0.8403	-0.251	yes	down	B(i)	C11720	-	-	-	-	-	-	HMDB0041886;PW_C022647	Organic acids and derivatives	Carboxylic acids and derivatives	Amino acids, peptides, and analogues	76420-72-9	349.175	5.49622	M+H	C18H24N2O5	44.9	0	metab_7740	pos_7741	pos	45.6	4.152	0.4384	4.941	0.2274
3,4-Dihydroxyhydrocinnamic Acid	1.869e-06	0.0002565	2.3309	2.3101	0.9044	-0.1449	yes	down	B(i)	C10447	-	-	map01100;map00946;map00350	Metabolic pathways;Degradation of flavonoids;Tyrosine metabolism	Metabolism;Metabolism;Metabolism	Global and overview maps;Biosynthesis of other secondary metabolites;Amino acid metabolism	HMDB0000423	Phenylpropanoids and polyketides	Phenylpropanoic acids	Not Available	1078-61-1	181.05	4.02292	M-H	C9H10O4	91.7	0	metab_12923	neg_1732	neg	57.1	5.877	0.06582	6.498	0.06224
5-Methoxy Amt	0.0001912	0.007418	2.3228	2.3035	0.8689	-0.2027	yes	down	B(i)	-	-	-	-	-	-	-	-	-	-	-	-	205.133	3.24057	M+H	C12H16N2O	64.3	0	metab_9005	pos_9006	pos	49.8	4.282	0.1169	4.928	0.1568
2-(2,5-Dioxopyrrolidin-1-Yl)-N-(2-Hydroxy-2-Methyl-4-Phenylbutyl)Acetamide	1.229e-06	0.0002032	2.3071	2.2924	0.8952	-0.1598	yes	down	B(i)	-	-	-	-	-	-	-	-	-	-	-	-	319.165	4.91083	M+H	C17H22N2O4	54	0	metab_3099	pos_3100	pos	49.1	5.208	0.07603	5.818	0.02302
Isocitric Acid	0.01944	0.1515	2.3016	2.3055	0.8364	-0.2578	yes	down	B(i)	C00311	Organic acids	Carboxylic acids	map01100;map00630;map01110;map05230;map01120;map01240;map01210;map01070;map00720;map01230;map01200;map04922;map00020;map01066;map01065;map01064;map01063;map01062;map01061;map01060	Metabolic pathways;Glyoxylate and dicarboxylate metabolism;Biosynthesis of secondary metabolites;Central carbon metabolism in cancer;Microbial metabolism in diverse environments;Biosynthesis of cofactors;2-Oxocarboxylic acid metabolism;Biosynthesis of plant hormones;Carbon fixation pathways in prokaryotes;Biosynthesis of amino acids;Carbon metabolism;Glucagon signaling pathway;Citrate cycle (TCA …	Metabolism;Metabolism;Metabolism;Human Diseases;Metabolism;Metabolism;Metabolism;Metabolism;Metabolism;Metabolism;Metabolism;Organismal Systems;Metabolism;Metabolism;Metabolism;Metabolism;Metabolism;Metabolism;Metabolism;Metabolism	Global and overview maps;Carbohydrate metabolism;Global and overview maps;Cancer: overview;Global and overview maps;Global and overview maps;Global and overview maps;Chemical structure transformation maps;Energy metabolism;Global and overview maps;Global and overview maps;Endocrine system;Carbohydrate metabolism;Chemical structure transformation maps;Chemical structure transformation maps;Chemica…	HMDB0000193;PW_C000125	Organic acids and derivatives	Carboxylic acids and derivatives	Tricarboxylic acids and derivatives	320-77-4	173.008	1.04185	M-H2O-H	C6H8O7	64.9	0	metab_11979	neg_788	neg	51.1	4.105	0.131	4.908	0.5866
(3S,5R,6R,7E)-3,5,6-Trihydroxy-7-Megastigmen-9-One	0.000319	0.01081	2.2981	2.2592	0.8913	-0.166	yes	down	B(ii)	-	-	-	-	-	-	-	HMDB0038736	Lipids and lipid-like molecules	Prenol lipids	Sesquiterpenoids	-	287.15	5.89093	M+FA-H	C13H22O4	0	60.8	metab_17444	neg_6253	neg	50.6	5.159	0.1036	5.788	0.1832
Afzelechin 7-Apioside	0.008231	0.09234	2.2961	2.2852	0.8565	-0.2235	yes	down	B(ii)	-	-	-	-	-	-	-	HMDB0030824	Phenylpropanoids and polyketides	Flavonoids	Flavans	114590-44-2	461.143	4.6063	M+CH3OH+Na	C20H22O9	0	57.8	metab_8178	pos_8179	pos	49.1	4.392	0.3705	5.128	0.1687
Naproxcinod	0.0001938	0.007484	2.2902	2.2866	0.8915	-0.1658	yes	down	B(ii)	-	-	-	-	-	-	-	HMDB0255456	Benzenoids	Naphthalenes	Not Available	-	392.138	5.41852	M+FA-H	C18H21NO6	0	57.6	metab_17693	neg_6502	neg	47.9	5.232	0.1478	5.869	0.1126
N,N'-Diacetylchitobiose	0.006735	0.08263	2.2701	2.3041	0.8629	-0.2127	yes	down	B(ii)	C01674	-	-	map01100;map00520;map02060;map02010	Metabolic pathways;Amino sugar and nucleotide sugar metabolism;Phosphotransferase system (PTS);ABC transporters	Metabolism;Metabolism;Environmental Information Processing;Environmental Information Processing	Global and overview maps;Carbohydrate metabolism;Membrane transport;Membrane transport	HMDB0062702	Organic oxygen compounds	Organooxygen compounds	Carbohydrates and carbohydrate conjugates	35061-50-8	479.187	2.72475	M+CH3OH+Na	C16H28N2O11	0	83.3	metab_9448	pos_9449	pos	54	4.627	0.3319	5.362	0.2182
(R)-1-Methylpiperidine-2-Carboxylic Acid	1.408e-06	0.0002175	2.2606	2.2434	0.8856	-0.1753	yes	down	B(ii)	-	-	-	-	-	-	-	HMDB0242107	Organic acids and derivatives	Carboxylic acids and derivatives	Amino acids, peptides, and analogues	-	176.128	2.01265	M+CH3OH+H	C7H13NO2	0	41.1	metab_9951	pos_9952	pos	46.4	4.521	0.06365	5.105	0.04968
Etiracetam	0.001719	0.03521	2.2537	2.2723	0.8805	-0.1836	yes	down	B(ii)	-	-	-	-	-	-	-	HMDB0252105	Organic acids and derivatives	Carboxylic acids and derivatives	Amino acids, peptides, and analogues	-	229.119	3.20157	M+Hac-H	C8H14N2O2	0	41.5	metab_12479	neg_1288	neg	47.1	4.936	0.05097	5.606	0.3049
Gly Pro Gln	8.016e-06	0.0007618	2.247	2.2421	0.8962	-0.1581	yes	down	B(i)	-	-	-	-	-	-	-	-	-	-	-	-	333.179	6.03417	M+CH3OH+H	C12H20N4O5	39.4	0	metab_7330	pos_7331	pos	44.2	5.087	0.08514	5.676	0.06095
Urobilin	8.067e-05	0.004066	2.2361	2.2312	0.9233	-0.1151	yes	down	B(i)	C05794	-	-	map00860	Porphyrin metabolism	Metabolism	Metabolism of cofactors and vitamins	HMDB0004160	Organoheterocyclic compounds	Tetrapyrroles and derivatives	Bilirubins	1856-98-0	591.317	5.72248	M+H	C33H42N4O6	72.1	0	metab_3480	pos_3481	pos	52.6	7.211	0.1111	7.81	0.1071
4-Allylanisole	6.94e-05	0.003663	2.2154	2.2069	0.8753	-0.1922	yes	down	B(i)	C10452	-	-	map01110;map00940	Biosynthesis of secondary metabolites;Phenylpropanoid biosynthesis	Metabolism;Metabolism	Global and overview maps;Biosynthesis of other secondary metabolites	HMDB0034121	Benzenoids	Phenol ethers	Anisoles	140-67-0	166.122	3.42962	M+NH4	C10H12O	56.6	0	metab_2255	pos_2256	pos	49.5	4.099	0.101	4.683	0.1085
Acetoxy-8-Gingerol	3.121e-05	0.002097	2.2	2.2171	0.8931	-0.1631	yes	down	B(i)	-	-	-	-	-	-	-	-	-	-	-	-	363.218	6.16403	M-H	C21H32O5	60.5	0	metab_17022	neg_5831	neg	48.5	4.872	0.119	5.455	0.03037
(R)-Laudanidine	0.01988	0.1532	2.1692	2.2177	0.8821	-0.181	yes	down	B(ii)	C17592	-	-	map00950;map01110	Isoquinoline alkaloid biosynthesis;Biosynthesis of secondary metabolites	Metabolism;Metabolism	Biosynthesis of other secondary metabolites;Global and overview maps	HMDB0030211	Organoheterocyclic compounds	Isoquinolines and derivatives	Benzylisoquinolines	301-21-3	385.214	5.76147	M+ACN+H	C20H25NO4	0	47.7	metab_7627	pos_7628	pos	47	5.604	0.07566	6.353	0.5619
Diflunisal	7.357e-06	0.0007161	2.1585	2.1386	0.8931	-0.1631	yes	down	B(ii)	C01691	-	-	-	-	-	-	HMDB0014999	Benzenoids	Benzene and substituted derivatives	Biphenyls and derivatives	22494-42-4	249.038	4.01493	M-H	C13H8F2O3	0	40.5	metab_18337	neg_7146	neg	45.1	4.488	0.07609	5.025	0.05561
Physangulide	0.000208	0.007939	2.1556	2.1392	0.8913	-0.166	yes	down	B(ii)	-	-	-	-	-	-	-	HMDB0037381	Lipids and lipid-like molecules	Steroids and steroid derivatives	Steroid lactones	131749-58-1	540.313	3.94005	M+NH4	C28H42O9	0	79.5	metab_2600	pos_2601	pos	48.7	4.583	0.1507	5.142	0.0511
Seneciphylline	7.818e-05	0.003986	2.1403	2.1165	0.8945	-0.1608	yes	down	B(ii)	C10391;_	-	-	-	-	-	-	HMDB0258231	Alkaloids and derivatives	Not Available	Not Available	480-81-9;_	354.13	4.02292	M+Na-2H	C18H23NO5	0	44.8	metab_12932	neg_1741	neg	44.7	4.563	0.09386	5.101	0.103
Tomaymycin-(Dh)2-Ppl Hemiaminal	0.0007051	0.01915	2.1359	2.1251	0.8935	-0.1625	yes	down	B(i)	-	-	-	-	-	-	-	-	-	-	-	-	335.159	5.89395	M+CH3OH+H	C16H18N2O4	42.6	0	metab_7536	pos_7537	pos	45.4	4.757	0.1458	5.324	0.149
N-(2-Methoxyethyl)-1-[3-(Trifluoromethyl)Benzoyl]Piperidine-3-Carboxamide	0.01229	0.1166	2.1351	2.1037	0.8721	-0.1975	yes	down	B(i)	-	-	-	-	-	-	-	-	-	-	-	-	359.157	5.34017	M+H	C17H21F3N2O3	82.1	0	metab_3299	pos_3300	pos	54.1	4.39	0.3248	5.034	0.2262
2-Amino-3-Methylbenzoate	0.007464	0.08725	2.1324	2.1127	0.8706	-0.1999	yes	down	B(ii)	C16571	-	-	map00982	Drug metabolism - cytochrome P450	Metabolism	Xenobiotics biodegradation and metabolism	HMDB0060680	Benzenoids	Benzene and substituted derivatives	Benzoic acids and derivatives	4389-45-1;_	303.133	5.6523	2M+H	C8H9NO2	0	41	metab_3450	pos_3451	pos	47.5	4.192	0.2291	4.815	0.2751
Senkyunolide N	6.342e-05	0.0035	2.1291	2.1181	0.9047	-0.1445	yes	down	B(ii)	-	-	-	-	-	-	-	HMDB0302272	Organoheterocyclic compounds	Isobenzofurans	Not Available	-	271.119	4.05492	M+FA-H	C12H18O4	0	40.6	metab_12953	neg_1762	neg	47.3	5.107	0.06318	5.645	0.1248
5(S)-Hpete	4.972e-05	0.00298	2.1271	2.1175	0.9054	-0.1434	yes	down	B(i)	C05356	Lipids	Eicosanoids	map00590;map01100;map04913;map07034;map04726	Arachidonic acid metabolism;Metabolic pathways;Ovarian steroidogenesis;Eicosanoids;Serotonergic synapse	Metabolism;Metabolism;Organismal Systems;Drug Development;Organismal Systems	Lipid metabolism;Global and overview maps;Endocrine system;Structure-based classification;Nervous system	HMDB0001193	Lipids and lipid-like molecules	Fatty Acyls	Eicosanoids	-	381.228	5.97957	M+FA-H	C20H32O4	37.4	0	metab_17329	neg_6138	neg	45.1	5.118	0.1157	5.653	0.03748
Prostaglandin B2	0.0001014	0.004651	2.1257	2.1029	0.9074	-0.1402	yes	down	B(i)	C05954	Lipids	Eicosanoids	map00590;map01100;map04726	Arachidonic acid metabolism;Metabolic pathways;Serotonergic synapse	Metabolism;Metabolism;Organismal Systems	Lipid metabolism;Global and overview maps;Nervous system	HMDB0004236;PW_C002099	Lipids and lipid-like molecules	Fatty Acyls	Eicosanoids	13367-85-6	379.212	5.78692	M+FA-H	C20H30O4	82.4	0	metab_17510	neg_6319	neg	55	5.222	0.1064	5.755	0.0935
2,6-Dimethoxybenzoic Acid	0.005517	0.07221	2.1017	2.1165	0.8713	-0.1987	yes	down	B(i)	-	-	-	-	-	-	-	HMDB0029273	Benzenoids	Benzene and substituted derivatives	Benzoic acids and derivatives	1466-76-8	224.091	5.80043	M+ACN+H	C9H10O4	54.3	0	metab_3517	pos_3518	pos	48.8	4.151	0.2847	4.764	0.1294
2-(3,4-Dihydroxyphenylethyl)-6-Epi-Elenaiate	0.0002387	0.008812	2.0984	2.095	0.9055	-0.1432	yes	down	B(ii)	-	-	-	-	-	-	-	HMDB0039137	Benzenoids	Phenols	Tyrosols and derivatives	50915-70-3	377.124	4.55148	M-H	C19H22O8	0	68.4	metab_18080	neg_6889	neg	52.5	5.154	0.1148	5.692	0.1192
Jasmolone	8.773e-05	0.004244	2.0727	2.0624	0.9152	-0.1279	yes	down	B(ii)	-	-	-	-	-	-	-	HMDB0030039	Organic oxygen compounds	Organooxygen compounds	Alcohols and polyols	54383-66-3	239.128	5.83492	M+Hac-H	C11H16O2	0	52.4	metab_13768	neg_2577	neg	49.6	5.524	0.05926	6.036	0.1277
2-Hydroxy-3-Methylpentanoic Acid	0.007163	0.08528	2.0702	2.0917	0.9059	-0.1426	yes	down	B(i)	-	-	-	-	-	-	-	HMDB0000317	Lipids and lipid-like molecules	Fatty Acyls	Fatty acids and conjugates	488-15-3	131.07	5.18855	M-H	C6H12O3	79.7	0	metab_17793	neg_6602	neg	54	5.892	0.288	6.504	0.1657
Sativan	0.000295	0.01019	2.0615	2.0616	0.9057	-0.1428	yes	down	B(ii)	C10526	-	-	-	-	-	-	HMDB0030521	Phenylpropanoids and polyketides	Isoflavonoids	O-methylated isoflavonoids	41743-86-6	331.118	4.5435	M+FA-H	C17H18O4	0	61.8	metab_13167	neg_1976	neg	51.3	5.025	0.1145	5.548	0.1214
Vanilloyl Glucose	0.004195	0.06118	2.061	2.0716	0.8836	-0.1785	yes	down	B(ii)	C20470	-	-	-	-	-	-	HMDB0302470	Phenylpropanoids and polyketides	Tannins	Hydrolyzable tannins	-	389.109	3.17517	M+Hac-H	C14H18O9	0	82.1	metab_18784	neg_7593	neg	54	4.411	0.2662	4.992	0.07793
Ganosporeric Acid A	0.03179	0.1974	2.0524	2.0739	0.8485	-0.2371	yes	down	B(ii)	C16526;_	Lipids;-	Fatty acids;-	map01040	Biosynthesis of unsaturated fatty acids	Metabolism	Lipid metabolism	HMDB0033022	Lipids and lipid-like molecules	Fatty Acyls	Fatty acids and conjugates	135357-25-4;	491.238	4.2062	M+H-2H2O	C30H38O8	0	46.5	metab_8396	pos_8397	pos	45.7	3.863	0.4954	4.553	0.1338
3-Methyl-N-[(3-Morpholin-4-Yloxolan-3-Yl)Methyl]Imidazole-4-Carboxamide	0.03182	0.1974	2.0437	2.0625	0.8794	-0.1854	yes	down	B(i)	-	-	-	-	-	-	-	-	-	-	-	-	295.176	2.80302	M+H	C14H22N4O3	38.4	0	metab_1752	pos_1753	pos	45.1	4.96	0.4699	5.64	0.2031
3-Ethoxypropanoic Acid	0.01829	0.1468	2.0399	2.0612	0.896	-0.1584	yes	down	B(i)	-	-	-	-	-	-	-	-	-	-	-	-	117.055	3.70848	M-H	C5H10O3	94.3	0	metab_18510	neg_7319	neg	56.6	5.523	0.3896	6.164	0.1571
Glutaminylhydroxyproline	0.01326	0.1224	2.0063	1.9476	0.8855	-0.1754	yes	down	B(ii)	-	-	-	-	-	-	-	HMDB0028798	Organic acids and derivatives	Carboxylic acids and derivatives	Amino acids, peptides, and analogues	-	280.094	3.60283	M+Na-2H	C10H17N3O5	0	52.9	metab_12701	neg_1510	neg	46.8	4.3	0.3313	4.856	0.03418
Fumagillol	0.001942	0.03817	1.9927	1.9664	0.9006	-0.1511	yes	down	B(ii)	C22618;_	-	-	map01100;map01110;map00998	Metabolic pathways;Biosynthesis of secondary metabolites;Biosynthesis of various antibiotics	Metabolism;Metabolism;Metabolism	Global and overview maps;Global and overview maps;Biosynthesis of other secondary metabolites	HMDB0252515	Organic oxygen compounds	Organooxygen compounds	Alcohols and polyols	108102-51-8;_	303.156	3.8628	M+Na-2H	C16H26O4	0	42.5	metab_18406	neg_7215	neg	44	4.566	0.1769	5.07	0.1229
Ser Pro Thr	0.0002081	0.007939	1.9906	2.0123	0.9132	-0.131	yes	down	B(i)	-	-	-	-	-	-	-	-	-	-	-	-	304.149	0.705033	M+H	C12H21N3O6	78.4	0	metab_10534	pos_10535	pos	52.2	5.199	0.1384	5.693	0.008933
Propyl 1-(Propylthio)Propyl Disulfide	0.02291	0.1668	1.9805	1.9494	0.9127	-0.1318	yes	down	B(ii)	-	-	-	-	-	-	-	HMDB0033040	Organosulfur compounds	Organic disulfides	Dialkyldisulfides	126876-27-5	245.049	6.76348	M+Na-2H	C9H20S3	0	65.4	metab_15031	neg_3840	neg	49.5	6.127	0.3009	6.713	0.3014
Sedanonic Acid	0.006574	0.0814	1.9631	1.9495	0.8905	-0.1673	yes	down	B(i)	-	-	-	-	-	-	-	HMDB0032871	Organic acids and derivatives	Keto acids and derivatives	Gamma-keto acids and derivatives	6697-07-0	209.118	6.29957	M-H	C12H18O3	72.9	0	metab_14454	neg_3263	neg	52	4.278	0.1694	4.804	0.246
Glu Leu Ser	0.001253	0.02875	1.9567	1.9334	0.9118	-0.1331	yes	down	B(i)	-	-	-	-	-	-	-	-	-	-	-	-	330.165	1.13925	M+H-H2O	C14H25N3O7	52	0	metab_955	pos_956	pos	46.5	4.944	0.1434	5.422	0.1283
Acipimox	0.0158	0.1349	1.9354	1.8644	0.8826	-0.1801	yes	down	B(ii)	-	-	-	-	-	-	-	HMDB0247941	Organoheterocyclic compounds	Diazines	Pyrazines	-	153.03	2.05525	M-H	C6H6N2O3	0	56.4	metab_18948	neg_7757	neg	48.3	3.895	0.3073	4.413	0.1138
Mupirocin	0.0007236	0.01946	1.9352	1.9372	0.9269	-0.1095	yes	down	B(ii)	C11758	-	-	-	-	-	-	HMDB0014554	Lipids and lipid-like molecules	Fatty Acyls	Fatty acids and conjugates	12650-69-0	555.317	3.47643	M+CH3OH+Na	C26H44O9	0	71.3	metab_2288	pos_2289	pos	51.2	5.999	0.1184	6.472	0.1296
(3-Phenyl-1-Oxa-2,4,8-Triazaspiro[4.5]Dec-3-En-8-Yl)-Pyrazin-2-Ylmethanone	7.309e-05	0.003787	1.9121	1.9116	0.9111	-0.1343	yes	down	B(i)	-	-	-	-	-	-	-	-	-	-	-	-	324.144	3.82228	M+H	C17H17N5O2	68	0	metab_8597	pos_8598	pos	49.4	4.5	0.05593	4.939	0.1019
3-(2,4-Dimethyl-5-(2-Oxo-1,2-Dihydroindol-3-Ylidenemethyl)-1H-Pyrrol-3-Yl)Propionic Acid	0.000479	0.01468	1.8959	1.8914	0.9176	-0.1241	yes	down	B(ii)	-	-	-	-	-	-	-	HMDB0258528	Organoheterocyclic compounds	Indoles and derivatives	Indolines	-	343.164	5.7147	M+CH3OH+H	C18H18N2O3	0	65.2	metab_7651	pos_7652	pos	48.2	4.953	0.1001	5.398	0.1185
Starch Acetate	3.106e-05	0.002096	1.8851	1.8563	0.9212	-0.1184	yes	down	B(ii)	-	-	-	-	-	-	-	HMDB0029891	Organic acids and derivatives	Carboxylic acids and derivatives	Tricarboxylic acids and derivatives	-	307.102	2.0906	M+H	C12H18O9	0	70.1	metab_9747	pos_9748	pos	51.6	4.78	0.07273	5.189	0.05171
3-(2-Hydroxyethyl)Histidine	0.0001457	0.005997	1.8838	1.8671	0.9226	-0.1162	yes	down	B(ii)	-	-	-	-	-	-	-	HMDB0245773	Organic acids and derivatives	Carboxylic acids and derivatives	Amino acids, peptides, and analogues	-	182.092	0.636367	M+H-H2O	C8H13N3O3	0	50.9	metab_10669	pos_10670	pos	48	5.041	0.07524	5.464	0.09624
(2S)-2-Amino-3-[4-[(2S)-2-Amino-3-(4-Hydroxyphenyl)Propanoyl]Oxy-3-Chlorophenyl]Propanoic Acid	0.01267	0.1187	1.8718	1.8488	0.894	-0.1617	yes	down	B(ii)	-	-	-	-	-	-	-	HMDB0260141	Organic acids and derivatives	Carboxylic acids and derivatives	Amino acids, peptides, and analogues	-	413.066	4.23273	M+Cl	C18H19ClN2O5	0	52.4	metab_13036	neg_1845	neg	42.6	4.207	0.1952	4.706	0.2563
Sec-O-Glucosylhamaudol	0.00484	0.06638	1.8579	1.8503	0.9146	-0.1287	yes	down	B(ii)	C17484;_	-	-	-	-	-	-	HMDB0258199	Organoheterocyclic compounds	Benzopyrans	1-benzopyrans	-;_	459.13	5.06988	M+Na-2H	C21H26O10	0	45.2	metab_17844	neg_6653	neg	46.5	4.993	0.1966	5.459	0.1306
4-Hydroxyhexanoylglycine	0.00207	0.03958	1.8567	1.8732	0.9192	-0.1216	yes	down	B(ii)	-	-	-	-	-	-	-	HMDB0094721	Organic acids and derivatives	Carboxylic acids and derivatives	Amino acids, peptides, and analogues	-	231.134	2.71695	M+ACN+H	C8H15NO4	0	44.1	metab_9530	pos_9531	pos	47.3	5.219	0.04562	5.678	0.2135
2-Methylbenzoic Acid	1.574e-06	0.0002246	1.8503	1.8381	0.9128	-0.1317	yes	down	B(i)	C07215	-	-	map01100;map01220;map00622;map01120	Metabolic pathways;Degradation of aromatic compounds;Xylene degradation;Microbial metabolism in diverse environments	Metabolism;Metabolism;Metabolism;Metabolism	Global and overview maps;Global and overview maps;Xenobiotics biodegradation and metabolism;Global and overview maps	HMDB0002340	Benzenoids	Benzene and substituted derivatives	Benzoic acids and derivatives	118-90-1	135.044	4.02292	M-H	C8H8O2	45.8	0	metab_18334	neg_7143	neg	45.8	4.112	0.03139	4.505	0.04856
Hypaphorine	0.03517	0.208	1.8464	1.896	0.886	-0.1746	yes	down	B(i)	C09213	-	-	-	-	-	-	HMDB0061115	Organic acids and derivatives	Carboxylic acids and derivatives	Amino acids, peptides, and analogues	487-58-1	247.144	3.23278	M+H	C14H18N2O2	71.2	0	metab_2117	pos_2118	pos	50.8	4.554	0.4248	5.14	0.1474
Lysylthreonine	0.0006197	0.01768	1.8461	1.8341	0.9214	-0.1181	yes	down	B(ii)	-	-	-	-	-	-	-	HMDB0028961	Organic acids and derivatives	Carboxylic acids and derivatives	Amino acids, peptides, and analogues	97791-84-9	311.17	2.52967	M+ACN+Na	C10H21N3O4	0	52.8	metab_1507	pos_1508	pos	47.2	4.946	0.1141	5.368	0.09729
2'-Deoxymugineic Acid	0.0004776	0.01468	1.8352	1.8362	0.9231	-0.1154	yes	down	B(ii)	C15485;_	-	-	map01100;map01110;map00999	Metabolic pathways;Biosynthesis of secondary metabolites;Biosynthesis of various plant secondary metabolites	Metabolism;Metabolism;Metabolism	Global and overview maps;Global and overview maps;Biosynthesis of other secondary metabolites	HMDB0033909	Organic acids and derivatives	Carboxylic acids and derivatives	Amino acids, peptides, and analogues	74235-24-8;_	305.134	1.02245	M+H	C12H20N2O7	0	59	metab_888	pos_889	pos	48.7	5.031	0.1283	5.45	0.04816
1,2,3,4-Tetrahydro-4-Oxo-Carbazole	0.004883	0.06678	1.8313	1.8002	0.9079	-0.1395	yes	down	B(i)	-	-	-	-	-	-	-	-	-	-	-	-	203.118	3.06993	M+NH4	C12H11NO	74.6	0	metab_1979	pos_1980	pos	52.4	4.365	0.2017	4.808	0.08808
3-(4-Hydroxyphenyl)Propionic Acid	0.0006036	0.01734	1.8276	1.8055	0.9239	-0.1142	yes	down	B(i)	C01744	-	-	map01100;map00946	Metabolic pathways;Degradation of flavonoids	Metabolism;Metabolism	Global and overview maps;Biosynthesis of other secondary metabolites	HMDB0002199	Phenylpropanoids and polyketides	Phenylpropanoic acids	Not Available	501-97-3	225.076	3.88287	M+Hac-H	C9H10O3	80.6	0	metab_18396	neg_7205	neg	53.2	4.954	0.1229	5.362	0.06856
Triacetic Acid	9.677e-07	0.0001671	1.8197	1.8118	0.9277	-0.1082	yes	down	B(ii)	C01757	-	-	-	-	-	-	HMDB0259137	Organic acids and derivatives	Keto acids and derivatives	Medium-chain keto acids and derivatives	-	289.091	2.38073	2M+H	C6H8O4	0	45.8	metab_9672	pos_9673	pos	48.2	4.879	0.03387	5.259	0.03821
Pyocyanin	0.0155	0.1334	1.8189	1.7944	0.9236	-0.1147	yes	down	B(ii)	C01748;_	-	-	map01100;map01110;map00405	Metabolic pathways;Biosynthesis of secondary metabolites;Phenazine biosynthesis	Metabolism;Metabolism;Metabolism	Global and overview maps;Global and overview maps;Biosynthesis of other secondary metabolites	HMDB0256934	Organoheterocyclic compounds	Diazanaphthalenes	Benzodiazines	85-66-5;_	245.049	6.53182	M+Cl	C13H10N2O	0	49.7	metab_14744	neg_3553	neg	48.4	5.765	0.187	6.242	0.2647
13-Oxoode	0.0372	0.214	1.7832	1.7547	0.8996	-0.1526	yes	down	B(i)	C14765;_	-	-	map00591	Linoleic acid metabolism	Metabolism	Lipid metabolism	HMDB0004668;LMFA02000252	Lipids and lipid-like molecules	Fatty Acyls	Lineolic acids and derivatives	-;_;	317.206	3.46083	M+Na	C18H30O3	48.1	0	metab_8851	pos_8852	pos	44.9	4.526	0.09019	5.031	0.4362
Streptidine	0.002278	0.04225	1.782	1.7559	0.9125	-0.132	yes	down	B(ii)	C00837;_	-	-	-	-	-	-	HMDB0258506	Organic oxygen compounds	Organooxygen compounds	Alcohols and polyols	85-17-6;_	261.134	5.1179	M-H	C8H18N6O4	0	57	metab_17830	neg_6639	neg	47.5	4.226	0.06021	4.631	0.1846
Choline Phosphate	0.01499	0.1311	1.7785	1.771	0.9061	-0.1423	yes	down	B(i)	C00588	-	-	map01100;map00564;map05231;map00552	Metabolic pathways;Glycerophospholipid metabolism;Choline metabolism in cancer;Teichoic acid biosynthesis	Metabolism;Metabolism;Human Diseases;Metabolism	Global and overview maps;Lipid metabolism;Cancer: overview;Glycan biosynthesis and metabolism	HMDB0001565	Organic nitrogen compounds	Organonitrogen compounds	Quaternary ammonium salts	107-73-3	184.073	6.03417	M+	C5H15NO4P+	92.1	0	metab_3791	pos_3792	pos	56.1	4.466	0.245	4.929	0.1683
3-Hydroxy-5,5,8A-Trimethyl-3,4,4A,6,7,8-Hexahydronaphthalene-2-Carboxylic Acid	0.03248	0.1994	1.767	1.7717	0.9029	-0.1474	yes	down	B(i)	-	-	-	-	-	-	-	-	-	-	-	-	237.149	6.41942	M-H	C14H22O3	36.7	0	metab_14626	neg_3435	neg	45.5	4.668	0.3058	5.17	0.2452
P-Toluenesulfonic Acid	2.509e-06	0.0003173	1.7597	1.7411	0.9297	-0.1052	yes	down	B(i)	C06677	-	-	map01100;map01220;map00623;map01120	Metabolic pathways;Degradation of aromatic compounds;Toluene degradation;Microbial metabolism in diverse environments	Metabolism;Metabolism;Metabolism;Metabolism	Global and overview maps;Global and overview maps;Xenobiotics biodegradation and metabolism;Global and overview maps	HMDB0059933	Benzenoids	Benzene and substituted derivatives	Benzenesulfonic acids and derivatives	104-15-4	171.011	4.01493	M-H	C7H8O3S	50.5	0	metab_18341	neg_7150	neg	47.2	4.667	0.03795	5.02	0.03855
Melibiose	1.993e-05	0.001524	1.7493	1.7431	0.9298	-0.1049	yes	down	B(ii)	C05402;_	Carbohydrates;-	Oligosaccharides;-	map01100;map02010;map00052	Metabolic pathways;ABC transporters;Galactose metabolism	Metabolism;Environmental Information Processing;Metabolism	Global and overview maps;Membrane transport;Carbohydrate metabolism	HMDB0000048	Organic oxygen compounds	Organooxygen compounds	Carbohydrates and carbohydrate conjugates	585-99-9;13299-20-2;_	307.102	2.39637	M+H-2H2O	C12H22O11	0	49.7	metab_9669	pos_9670	pos	41.7	4.745	0.06283	5.103	0.03573
2,5-Difluoro-N-(3-Methyl-[1,2,4]Triazolo[4,3-A]Pyridin-8-Yl)Benzamide	8.314e-08	2.8e-05	1.7303	1.7237	0.935	-0.097	yes	down	B(i)	-	-	-	-	-	-	-	-	-	-	-	-	289.091	2.0906	M+H	C14H10F2N4O	48.4	0	metab_1381	pos_1382	pos	45.4	4.919	0.01041	5.261	0.03223
3-Ethenyl-4-Hydroxy-2,5-Dimethylhex-5-En-2-Yl Acetate	0.001449	0.03174	1.7159	1.6833	0.9302	-0.1044	yes	down	B(ii)	-	-	-	-	-	-	-	HMDB0041572	Organic acids and derivatives	Carboxylic acids and derivatives	Carboxylic acid derivatives	79507-90-7	257.139	4.65562	M+FA-H	C12H20O3	0	46.7	metab_13212	neg_2021	neg	48.2	4.877	0.1357	5.243	0.04908
5-Methyl-4-Oxo-N-Propyl-1,5-Diazacycloundecane-1-Carboxamide	0.0002917	0.0101	1.6759	1.682	0.9293	-0.1057	yes	down	B(i)	-	-	-	-	-	-	-	-	-	-	-	-	270.217	2.91257	M+H	C14H27N3O2	58.9	0	metab_9290	pos_9291	pos	48.9	4.577	0.09955	4.925	0.03199
3''-Deamino-3''-Oxonicotianamine	1.618e-05	0.001306	1.669	1.6609	0.9384	-0.0918	yes	down	B(ii)	C15486;_	-	-	map01100;map01110;map00999	Metabolic pathways;Biosynthesis of secondary metabolites;Biosynthesis of various plant secondary metabolites	Metabolism;Metabolism;Metabolism	Global and overview maps;Global and overview maps;Biosynthesis of other secondary metabolites	HMDB0304096	Organic acids and derivatives	Carboxylic acids and derivatives	Amino acids, peptides, and analogues	-;_	284.103	4.01802	M+H-H2O	C12H17N2O7-	0	52.7	metab_8492	pos_8493	pos	47.1	4.949	0.05992	5.274	0.01591
(S)-2-Propylpiperidine	0.00939	0.09967	1.6658	1.6891	0.9141	-0.1296	yes	down	B(ii)	C06523	-	-	map01066;map01060	Biosynthesis of alkaloids derived from terpenoid and polyketide;Biosynthesis of plant secondary metabolites	Metabolism;Metabolism	Chemical structure transformation maps;Chemical structure transformation maps	HMDB0030285	Alkaloids and derivatives	Not Available	Not Available	458-88-8	145.17	0.567133	M+NH4	C8H17N	0	45.4	metab_10891	pos_10892	pos	47	4.33	0.2238	4.737	0.03748
Australine	8.476e-05	0.004188	1.6592	1.6575	0.9465	-0.0794	yes	down	B(i)	C10132	-	-	-	-	-	-	-	-	-	-	118396-02-4	190.107	0.712567	M+H	C8H15NO4	56.2	0	metab_10504	pos_10505	pos	48.9	5.836	0.06535	6.166	0.05413
Met Tyr Gln	0.02425	0.1711	1.6583	1.6616	0.9176	-0.124	yes	down	B(i)	-	-	-	-	-	-	-	-	-	-	-	-	458.206	3.4212	M+NH4	C19H28N4O6S	62.3	0	metab_2254	pos_2255	pos	49.7	4.757	0.1884	5.184	0.2609
Cypridina Luciferin	0.001656	0.03423	1.6499	1.6238	0.9379	-0.0926	yes	down	B(ii)	C02825;_	-	-	-	-	-	-	HMDB0250695	Organoheterocyclic compounds	Indoles and derivatives	Indoles	7273-34-9;_	404.219	5.94757	M-H	C22H27N7O	0	43	metab_17367	neg_6176	neg	44.9	5.162	0.08803	5.504	0.12
Asp Asp Phe	0.002385	0.04347	1.6418	1.6274	0.9314	-0.1025	yes	down	B(i)	-	-	-	-	-	-	-	-	-	-	-	-	378.129	3.48425	M+H-H2O	C17H21N3O8	41.1	0	metab_2296	pos_2297	pos	45.9	4.726	0.1353	5.074	0.06997
Leptomycin B	0.008656	0.09515	1.64	1.6563	0.9319	-0.1017	yes	down	B(i)	-	-	-	-	-	-	-	HMDB0254018	Lipids and lipid-like molecules	Fatty Acyls	Fatty acids and conjugates	-	541.347	6.04975	M+H	C33H48O6	45.7	0	metab_3820	pos_3821	pos	42.3	5.311	0.1562	5.699	0.1661
4-Hydroxyproline Galactoside	0.00205	0.03932	1.6299	1.6415	0.9337	-0.099	yes	down	B(ii)	-	-	-	-	-	-	-	HMDB0029354	Lipids and lipid-like molecules	Fatty Acyls	Fatty alcohol esters	80185-44-0	292.104	0.7118	M-H	C11H19NO8	0	76.8	metab_19427	neg_8236	neg	52.9	4.956	0.09309	5.308	0.1296
Cadabicine	0.0008358	0.02151	1.6279	1.62	0.9412	-0.0875	yes	down	B(ii)	-	-	-	-	-	-	-	HMDB0033451	Organic oxygen compounds	Organooxygen compounds	Ethers	99964-83-7	468.248	5.37917	M+CH3OH+H	C25H29N3O4	0	58.4	metab_3319	pos_3320	pos	49	5.312	0.1105	5.644	0.04545
4Alpha-Carboxy-4Beta-Methyl-5Alpha-Cholesta-8,24-Dien-3Beta-Ol	0.04841	0.2458	1.6267	1.5954	0.9189	-0.122	yes	down	B(ii)	C15808;_	-	-	map01100;map01110;map00100	Metabolic pathways;Biosynthesis of secondary metabolites;Steroid biosynthesis	Metabolism;Metabolism;Metabolism	Global and overview maps;Global and overview maps;Lipid metabolism	HMDB0062383	Lipids and lipid-like molecules	Prenol lipids	Triterpenoids	-;_	465.332	5.99525	M+Na	C29H46O3	0	52.1	metab_3731	pos_3732	pos	43.7	4.919	0.1428	5.353	0.3802
Tryptophol	0.02917	0.1881	1.6229	1.6795	0.9125	-0.1321	yes	down	B(i)	C00955	-	-	map00380	Tryptophan metabolism	Metabolism	Amino acid metabolism	HMDB0003447	Organoheterocyclic compounds	Indoles and derivatives	Indoles	526-55-6	203.118	5.58205	M+ACN+H	C10H11NO	87.2	0	metab_3423	pos_3424	pos	54.8	4.672	0.1708	5.12	0.3169
Threonylphenylalanine	0.002099	0.03994	1.6116	1.5987	0.9329	-0.1001	yes	down	B(ii)	-	-	-	-	-	-	-	HMDB0029068	Organic acids and derivatives	Carboxylic acids and derivatives	Amino acids, peptides, and analogues	16875-27-7	321.144	5.6523	M+CH3OH+Na	C13H18N2O4	0	70.6	metab_7674	pos_7675	pos	50.6	4.633	0.06585	4.966	0.1408
Ala Gln Thr	6.531e-05	0.003554	1.6107	1.6178	0.9502	-0.0737	yes	down	B(i)	-	-	-	-	-	-	-	-	-	-	-	-	319.165	5.90177	M+H	C12H22N4O6	37.2	0	metab_7527	pos_7528	pos	44.3	5.988	0.07141	6.302	0.01946
9,10,13-Trihydroxystearic Acid	2.834e-05	0.00197	1.6103	1.5968	0.9477	-0.0775	yes	down	B(ii)	-	-	-	-	-	-	-	HMDB0030935	Lipids and lipid-like molecules	Fatty Acyls	Fatty acids and conjugates	50439-74-2	374.289	5.96408	M+ACN+H	C18H36O5	0	60.7	metab_7446	pos_7447	pos	48.7	5.487	0.04928	5.79	0.04392
N1,N12-Diacetylspermine	0.03198	0.1978	1.5759	1.5338	0.9391	-0.0907	yes	down	B(i)	C03413	-	-	-	-	-	-	HMDB0002172	Organic acids and derivatives	Carboximidic acids and derivatives	Carboximidic acids	61345-83-3	287.243	0.628567	M+H	C14H30N4O2	74.3	0	metab_454	pos_455	pos	53.3	5.811	0.2366	6.188	0.1689
2,2-Dimethyl Succinic Acid	5.389e-05	0.003113	1.5587	1.5511	0.9453	-0.0811	yes	down	B(i)	-	-	-	-	-	-	-	HMDB0002074	Lipids and lipid-like molecules	Fatty Acyls	Fatty acids and conjugates	597-43-3	145.05	2.03925	M-H	C6H10O4	59.7	0	metab_19081	neg_7890	neg	49.6	4.963	0.02007	5.25	0.0718
Lys Glu Phe	0.01923	0.151	1.5453	1.521	0.9348	-0.0972	yes	down	B(i)	-	-	-	-	-	-	-	-	-	-	-	-	440.253	3.79108	M+NH4	C20H30N4O6	63.9	0	metab_2508	pos_2509	pos	50.5	5.05	0.2123	5.402	0.09944
Lysope(0:0/16:1(9Z))	0.03678	0.2131	1.5401	1.5741	0.9146	-0.1288	yes	down	B(ii)	-	-	-	-	-	-	-	HMDB0011474	Lipids and lipid-like molecules	Glycerophospholipids	Glycerophosphoethanolamines	-	416.252	5.53525	M+H-2H2O	C21H42NO7P	0	62	metab_3402	pos_3403	pos	46.2	4.347	0.05928	4.753	0.3528
Rutacridone Epoxide	0.02286	0.1666	1.5259	1.4961	0.9314	-0.1025	yes	down	B(ii)	C10739	-	-	-	-	-	-	HMDB0033853	Organoheterocyclic compounds	Quinolines and derivatives	Benzoquinolines	77996-03-3	368.117	7.24487	M+FA-H	C19H17NO4	0	47.4	metab_15883	neg_4692	neg	44.4	4.699	0.2053	5.045	0.132
Lomustine	0.012	0.115	1.5246	1.4916	0.9294	-0.1057	yes	down	B(ii)	C07079	-	-	-	-	-	-	HMDB0015337	Organic acids and derivatives	Organic carbonic acids and derivatives	Ureas	13010-47-4	268.065	5.7789	M+Cl	C9H16ClN3O2	0	46.1	metab_13740	neg_2549	neg	41.5	4.251	0.1273	4.574	0.1616
Netivudine	0.02256	0.1654	1.5097	1.5133	0.9333	-0.0996	yes	down	B(ii)	-	-	-	-	-	-	-	HMDB0255549	Nucleosides, nucleotides, and analogues	Pyrimidine nucleosides	Not Available	-	265.081	3.55512	M+H-H2O	C12H14N2O6	0	40	metab_2341	pos_2342	pos	46.5	4.895	0.2318	5.245	0.05688
Gln Ser Ser	0.02758	0.183	1.5057	1.5067	0.9308	-0.1035	yes	down	B(i)	-	-	-	-	-	-	-	-	-	-	-	-	321.144	5.76927	M+H	C11H20N4O7	37.6	0	metab_7622	pos_7623	pos	43.7	4.774	0.1691	5.129	0.2161
His Lys Arg	0.02304	0.167	1.5044	1.4922	0.9428	-0.0849	yes	down	B(i)	-	-	-	-	-	-	-	-	-	-	-	-	879.545	6.6524	2M+H	C18H33N9O4	73.9	0	metab_6286	pos_6287	pos	52.4	5.672	0.212	6.016	0.1141
Daidzein	0.02591	0.177	1.5013	1.5217	0.9348	-0.0973	yes	down	B(i)	C10208	-	-	map00943;map01100;map01110;map00946;map01061	Isoflavonoid biosynthesis;Metabolic pathways;Biosynthesis of secondary metabolites;Degradation of flavonoids;Biosynthesis of phenylpropanoids	Metabolism;Metabolism;Metabolism;Metabolism;Metabolism	Biosynthesis of other secondary metabolites;Global and overview maps;Global and overview maps;Biosynthesis of other secondary metabolites;Chemical structure transformation maps	HMDB0003312;LMPK12050038	Phenylpropanoids and polyketides	Isoflavonoids	Isoflav-2-enes	486-66-8;	255.065	5.96408	M+H	C15H10O4	82.3	0	metab_7448	pos_7449	pos	54.7	5.215	0.1948	5.579	0.1888

## Sheet: up_IG_vs_SG
Metabolite	P_value	FDR	VIP_pred_OPLS-DA	VIP_PLS-DA	FC(intervention/Sham)	Log2FC(intervention/Sham)	Significant	Regulate	level	KEGG Compound ID	KEGG Compound First Category	KEGG Compound Second Category	KEGG Pathway ID	KEGG Pathway Description	KEGG Pathway First Category	KEGG Pathway Second Category	Library ID	HMDB Superclass	HMDB Class	HMDB Subclass	CAS ID	M/Z	Retention time	Adducts	Formula	Fragmentation Score	Theoretical Fragmentation Score	Metab ID	ID	Mode	Score	intervention_mean	intervention_SD	sham_mean	sham_SD
Nanaomycin	3.734e-08	4.127e-05	4.6291	4.6064	1.9523	0.9652	yes	up	B(i)	-	-	-	-	-	-	-	-	-	-	-	-	301.071	5.47418	M-H	C16H14O6	49.9	0	metab_17642	neg_6451	neg	48.9	5.693	0.1491	2.916	0.1797
2,4-Quinolinediol	5.354e-07	0.0001535	4.05	4.0391	1.446	0.5321	yes	up	B(i)	C16716	-	-	map00996;map01063	Biosynthesis of various alkaloids;Biosynthesis of alkaloids derived from shikimate pathway	Metabolism;Metabolism	Biosynthesis of other secondary metabolites;Chemical structure transformation maps	HMDB0245468	Organoheterocyclic compounds	Quinolines and derivatives	Quinolones and derivatives	-	162.055	4.49698	M+H	C9H7NO2	65	0	metab_2895	pos_2896	pos	50.7	6.964	0.2346	4.816	0.08238
Sulfo Jasmonate	1.383e-06	0.0002986	3.8648	3.8221	1.4082	0.4938	yes	up	B(i)	-	-	-	-	-	-	-	-	-	-	-	-	305.07	4.56698	M-H	C12H18O7S	70.9	0	metab_18073	neg_6882	neg	53.1	6.655	0.02938	4.726	0.2903
Gynocardin	1.591e-08	2.375e-05	3.8563	3.8422	1.434	0.52	yes	up	B(ii)	C08331	-	-	-	-	-	-	HMDB0029913	Organic oxygen compounds	Organooxygen compounds	Carbohydrates and carbohydrate conjugates	14332-17-3	345.13	2.88913	M+ACN+H	C12H17NO8	0	65.6	metab_9307	pos_9308	pos	52	6.374	0.03909	4.445	0.146
Fa(12:1+1O)	1.639e-05	0.00153	3.6925	3.6794	1.5972	0.6755	yes	up	B(i)	-	-	-	-	-	-	-	-	-	-	-	-	259.155	4.12853	M+FA-H	C12H22O3	53.1	0	metab_18270	neg_7079	neg	49.4	4.865	0.1333	3.046	0.3667
(3S,5R,6R,6'S)-6,7-Didehydro-5,6-Dihydro-3,5,6'-Trihydroxy-13,14,20-Trinor-3'-Oxo-Beta,Epsilon-Caroten-19',11'-Olide 3-Acetate	7.231e-05	0.003724	3.6844	3.6674	1.4719	0.5577	yes	up	B(ii)	-	-	-	-	-	-	-	HMDB0037793	Lipids and lipid-like molecules	Prenol lipids	Terpene lactones	256505-50-7	593.332	7.71665	M+H-2H2O	C39H48O7	0	43.9	metab_5654	pos_5655	pos	43.7	5.733	0.2835	3.895	0.384
Isoquinolone	3.419e-06	0.0005436	3.6518	3.6483	1.3668	0.4508	yes	up	B(i)	-	-	-	-	-	-	-	-	-	-	-	-	146.06	4.88742	M+H	C9H7NO	62.2	0	metab_8040	pos_8041	pos	51.8	6.588	0.2542	4.82	0.08626
Pantethine	5.946e-06	0.0008113	3.6084	3.5749	1.5031	0.5879	yes	up	B(i)	C12661;_	-	-	-	-	-	-	HMDB0256114;HMDB0003828	Organic acids and derivatives	Carboxylic acids and derivatives	Amino acids, peptides, and analogues	16816-67-4;_	553.237	5.01368	M-H	C22H42N4O8S2	87.3	0	metab_17885	neg_6694	neg	53.8	5.088	0.274	3.385	0.04764
(+/-)-Tryptophan	6.235e-07	0.0001669	3.5883	3.5957	1.5485	0.6309	yes	up	B(ii)	C00806	-	-	-	-	-	-	HMDB0030396	Organoheterocyclic compounds	Indoles and derivatives	Indolyl carboxylic acids and derivatives	1954-12-06	259.107	5.25432	M+CH3OH+Na	C11H12N2O2	0	53	metab_3256	pos_3257	pos	47.6	4.802	0.04077	3.101	0.2245
Phenobarbital	0.000326	0.008903	3.4742	3.5186	1.6034	0.6811	yes	up	B(ii)	C07434	-	-	map05207	Chemical carcinogenesis - receptor activation	Human Diseases	Cancer: overview	HMDB0015305	Organoheterocyclic compounds	Diazines	Pyrimidines and pyrimidine derivatives	1950/6/6;50-06-6	277.083	2.96678	M+FA-H	C12H12N2O3	0	42	metab_18839	neg_7648	neg	46.1	4.621	0.126	2.882	0.589
Supinidine	3.703e-07	0.0001293	3.3999	3.3687	1.3693	0.4535	yes	up	B(ii)	C10400	-	-	-	-	-	-	HMDB0302361	Alkaloids and derivatives	Not Available	Not Available	551-59-7;_	184.097	5.30805	M+FA-H	C8H13NO	0	48.3	metab_13512	neg_2321	neg	48.2	5.528	0.03667	4.037	0.1815
Urobilinogen	3.858e-05	0.00256	3.3879	3.4057	1.3906	0.4757	yes	up	B(ii)	C05790;C05791	-	-	map01100;map01110;map00860	Metabolic pathways;Biosynthesis of secondary metabolites;Porphyrin metabolism	Metabolism;Metabolism;Metabolism	Global and overview maps;Global and overview maps;Metabolism of cofactors and vitamins	HMDB0004158	Organoheterocyclic compounds	Tetrapyrroles and derivatives	Bilirubins	14684-37-8;17208-65-0	623.343	5.53525	M+CH3OH+H	C33H42N4O6	0	71	metab_7721	pos_7722	pos	52.3	5.586	0.3247	4.017	0.11
Clindamycin	0.0006509	0.01328	3.3558	3.3225	1.3735	0.4578	yes	up	B(i)	C06914	-	-	-	-	-	-	HMDB0015321;PW_C009603	Organic acids and derivatives	Carboxylic acids and derivatives	Amino acids, peptides, and analogues	18323-44-9	425.188	4.5438	M+H	C18H33ClN2O5S	63.5	0	metab_2919	pos_2920	pos	46.2	5.807	0.2202	4.228	0.5631
Trans-Piceid	3.855e-08	4.127e-05	3.2913	3.264	1.3391	0.4213	yes	up	B(ii)	C10275	-	-	-	-	-	-	HMDB0030564	Phenylpropanoids and polyketides	Stilbenes	Stilbene glycosides	27208-80-6	389.121	3.48442	M-H	C20H22O8	0	68.1	metab_12640	neg_1449	neg	48.4	5.505	0.06708	4.111	0.09875
5-Methyl-N-[(1-Methylbenzimidazol-5-Yl)Methyl]Thiophene-2-Carboxamide	0.0001675	0.00609	3.239	3.2197	1.4653	0.5512	yes	up	B(i)	-	-	-	-	-	-	-	-	-	-	-	-	286.104	4.70778	M+H	C15H15N3OS	79.3	0	metab_8117	pos_8118	pos	49.7	4.519	0.1304	3.084	0.4238
5-Hydroxyhexanoylglycine	1.352e-06	0.0002986	3.1183	3.0916	1.266	0.3403	yes	up	B(ii)	-	-	-	-	-	-	-	HMDB0094722	Organic acids and derivatives	Carboxylic acids and derivatives	Amino acids, peptides, and analogues	-	188.092	2.03925	M-H	C8H15NO4	0	57.1	metab_19069	neg_7878	neg	50	6.015	0.1455	4.751	0.09026
Pe(P-16:0/14:0)	1.359e-05	0.001337	3.0904	3.0487	1.2771	0.3528	yes	up	B(i)	-	-	-	-	-	-	-	HMDB0011335;LMGP02030009	Lipids and lipid-like molecules	Glycerophospholipids	Glycerophosphoethanolamines	_;	648.497	7.47737	M+H	C35H70NO7P	46.9	0	metab_5753	pos_5754	pos	47.4	5.743	0.1498	4.497	0.2006
N-(2,3,4-Trihydroxybutyl)-L-Valine	6.277e-08	5.2e-05	3.0693	3.0445	1.267	0.3414	yes	up	B(ii)	-	-	-	-	-	-	-	HMDB0254995	Organic acids and derivatives	Carboxylic acids and derivatives	Amino acids, peptides, and analogues	-	186.112	4.84837	M+H-2H2O	C9H19NO5	0	54.6	metab_8060	pos_8061	pos	50	5.751	0.05117	4.539	0.1012
Peldesine	1.626e-08	2.375e-05	3.0635	3.0555	1.2974	0.3756	yes	up	B(ii)	-	-	-	-	-	-	-	HMDB0256208	Organoheterocyclic compounds	Pyrrolopyrimidines	Not Available	-	300.11	3.48442	M+Hac-H	C12H11N5O	0	56.2	metab_18616	neg_7425	neg	49.8	5.327	0.04712	4.106	0.08033
Gibberellin A8-Catabolite	1.804e-08	2.415e-05	3.0492	3.0305	1.2764	0.3521	yes	up	B(ii)	C11870;_	-	-	map00904	Diterpenoid biosynthesis	Metabolism	Metabolism of terpenoids and polyketides	HMDB0304364	Lipids and lipid-like molecules	Prenol lipids	Diterpenoids	78791-79-4;_;	343.115	3.48442	M-H2O-H	C19H22O7	0	69.2	metab_12639	neg_1448	neg	49.9	5.546	0.05834	4.345	0.06961
Peimine	2.448e-05	0.001927	3.0476	3.0173	1.3031	0.382	yes	up	B(ii)	C10830;_	-	-	-	-	-	-	HMDB0256205	Lipids and lipid-like molecules	Steroids and steroid derivatives	Steroidal alkaloids	23496-41-5;_	454.327	5.7069	M+Na	C27H45NO3	0	55.4	metab_7654	pos_7655	pos	47.5	5.279	0.1252	4.051	0.246
Boc-D-Phenylalanine	1.772e-05	0.001607	3.0367	3	1.2567	0.3297	yes	up	B(ii)	-	-	-	-	-	-	-	HMDB0249332	Organic acids and derivatives	Carboxylic acids and derivatives	Amino acids, peptides, and analogues	-	248.128	6.0108	M+H-H2O	C14H19NO4	0	46.8	metab_7370	pos_7371	pos	48	5.913	0.04068	4.705	0.2633
Ethyl Sulfate	8.098e-05	0.003958	3.0253	3.0403	1.2755	0.351	yes	up	B(i)	-	-	-	-	-	-	-	HMDB0031233	Organic acids and derivatives	Organic sulfuric acids and derivatives	Sulfuric acid esters	540-82-9	170.996	0.687817	M+FA-H	C2H6O4S	65.2	0	metab_19555	neg_8364	neg	51	5.857	0.07544	4.592	0.3426
D-Pantethine	6.424e-05	0.003529	2.9829	2.9446	1.2257	0.2936	yes	up	B(i)	-	-	-	-	-	-	-	HMDB0003828	Organic acids and derivatives	Carboxylic acids and derivatives	Amino acids, peptides, and analogues	16816-67-4	555.251	4.5438	M+H	C22H42N4O8S2	87.4	0	metab_8206	pos_8207	pos	55.4	6.425	0.2153	5.242	0.1994
3-Hydroxykynurenine	1.629e-05	0.00153	2.977	2.9484	1.3185	0.3989	yes	up	B(i)	C02794	-	-	-	-	-	-	HMDB0000732	Organic oxygen compounds	Organooxygen compounds	Carbonyl compounds	2147-61-7	225.087	3.64943	M+H	C10H12N2O4	67.3	0	metab_8728	pos_8729	pos	51.3	4.831	0.05403	3.664	0.2473
N-Myristoyl Tyrosine	3.625e-05	0.002467	2.9537	2.9757	1.27	0.3448	yes	up	B(ii)	-	-	-	-	-	-	-	HMDB0242062	Organic acids and derivatives	Carboxylic acids and derivatives	Amino acids, peptides, and analogues	-	396.252	6.82178	M+Na-H2O	C23H37NO4	0	53	metab_4968	pos_4969	pos	48.5	5.617	0.2439	4.423	0.08655
N-Acetylhistamine	0.001711	0.02353	2.9367	2.9151	1.2216	0.2888	yes	up	B(i)	C05135	-	-	map00340	Histidine metabolism	Metabolism	Amino acid metabolism	HMDB0013253	Organic acids and derivatives	Carboxylic acids and derivatives	Carboxylic acid derivatives	-;673-49-4	154.097	0.944533	M+H	C7H11N3O	79.5	0	metab_821	pos_822	pos	53.9	6.923	0.08564	5.667	0.5728
3-Amino-3-(4-Hydroxyphenyl)Propanoate	0.0005577	0.01227	2.8538	2.834	1.2933	0.3711	yes	up	B(i)	C04368	-	-	map00350	Tyrosine metabolism	Metabolism	Amino acid metabolism	HMDB0003831	Organic acids and derivatives	Carboxylic acids and derivatives	Amino acids, peptides, and analogues	-	162.055	5.27605	M-H2O-H	C9H11NO3	58.1	0	metab_17755	neg_6564	neg	49.1	5.04	0.3749	3.897	0.05083
Allysine	4.666e-09	1.856e-05	2.7695	2.7629	1.2062	0.2704	yes	up	B(ii)	C04076;_;C01475	-	-	map01100;map00310;map01110;map00300;map01120;map00960;map01230;map01064;map01060	Metabolic pathways;Lysine degradation;Biosynthesis of secondary metabolites;Lysine biosynthesis;Microbial metabolism in diverse environments;Tropane, piperidine and pyridine alkaloid biosynthesis;Biosynthesis of amino acids;Biosynthesis of alkaloids derived from ornithine, lysine and nicotinic acid;Biosynthesis of plant secondary metabolites	Metabolism;Metabolism;Metabolism;Metabolism;Metabolism;Metabolism;Metabolism;Metabolism;Metabolism	Global and overview maps;Amino acid metabolism;Global and overview maps;Amino acid metabolism;Global and overview maps;Biosynthesis of other secondary metabolites;Global and overview maps;Chemical structure transformation maps;Chemical structure transformation maps	HMDB0001263	Organic acids and derivatives	Carboxylic acids and derivatives	Amino acids, peptides, and analogues	-;6665-12-9;_;1962-83-0	187.107	1.91855	M+ACN+H	C6H11NO3	0	57.7	metab_9990	pos_9991	pos	50.7	5.833	0.0387	4.836	0.04884
Deoxycholic Acid 3-Glucuronide	0.00245	0.02933	2.765	2.7695	1.2578	0.3309	yes	up	B(ii)	C03033;_	-	-	map01100;map00040;map04976;map00053;map01240	Metabolic pathways;Pentose and glucuronate interconversions;Bile secretion;Ascorbate and aldarate metabolism;Biosynthesis of cofactors	Metabolism;Metabolism;Organismal Systems;Metabolism;Metabolism	Global and overview maps;Carbohydrate metabolism;Digestive system;Carbohydrate metabolism;Global and overview maps	HMDB0002596	Lipids and lipid-like molecules	Steroids and steroid derivatives	Steroidal glycosides	72504-58-6;	623.343	5.67568	M+CH3OH+Na	C30H48O10	0	50.3	metab_3464	pos_3465	pos	47.5	5.592	0.3923	4.446	0.3391
3-Hydroxy-12-Oxocholan-24-Oic Acid	0.00302	0.03312	2.7378	2.6984	1.2498	0.3217	yes	up	B(i)	-	-	-	-	-	-	-	-	-	-	-	-	391.283	7.88803	M+H	C24H38O4	81.7	0	metab_5525	pos_5526	pos	54.6	5.519	0.4776	4.416	0.1284
Cyclo(L-Phe-L-Pro)	2.279e-05	0.001858	2.7141	2.709	1.2398	0.3101	yes	up	B(ii)	C11847;_	-	-	-	-	-	-	HMDB0250631	Organic acids and derivatives	Carboxylic acids and derivatives	Amino acids, peptides, and analogues	3705-26-8;_	245.128	3.81448	M+H	C14H16N2O2	0	48.8	metab_2520	pos_2521	pos	46.4	5.113	0.174	4.124	0.1065
Mesobilirubinogen	0.002787	0.03143	2.5982	2.6345	1.2429	0.3137	yes	up	B(ii)	C05790	-	-	map00860	Porphyrin metabolism	Metabolism	Metabolism of cofactors and vitamins	HMDB0001898	Organoheterocyclic compounds	Tetrapyrroles and derivatives	Bilirubins	14684-37-8	591.319	5.86693	M-H	C33H44N4O6	0	45.8	metab_13795	neg_2604	neg	47.3	5.337	0.4284	4.294	0.1828
5-Hydroxyindole-3-Acetic Acid	1.895e-07	9.141e-05	2.5829	2.5746	1.1819	0.2411	yes	up	B(i)	C05635	-	-	map01100;map04726;map00380	Metabolic pathways;Serotonergic synapse;Tryptophan metabolism	Metabolism;Organismal Systems;Metabolism	Global and overview maps;Nervous system;Amino acid metabolism	HMDB0000763	Organoheterocyclic compounds	Indoles and derivatives	Indolyl carboxylic acids and derivatives	54-16-0	192.065	4.25308	M+H	C10H9NO3	92.6	0	metab_8374	pos_8375	pos	57.6	5.66	0.05564	4.789	0.07485
7-O-Succinyl Macrolactin A	0.002138	0.02679	2.5528	2.5116	1.1885	0.2492	yes	up	B(ii)	-	-	-	-	-	-	-	HMDB0247277	Phenylpropanoids and polyketides	Macrolides and analogues	Not Available	-	520.292	7.91927	M+NH4	C28H38O8	0	45	metab_5535	pos_5536	pos	45.8	5.92	0.3687	4.981	0.1535
Arabinogalactose	0.02645	0.1296	2.4981	2.4807	1.3783	0.4629	yes	up	B(ii)	C07285	-	-	-	-	-	-	HMDB0302563	Organic oxygen compounds	Organooxygen compounds	Carbohydrates and carbohydrate conjugates	-	293.088	2.2655	M-H2O-H	C11H20O10	0	40.5	metab_18901	neg_7710	neg	46.5	3.942	0.7609	2.86	0.04759
3-Amino-2-Methoxynonadec-5-En-4-Ol	0.000393	0.009971	2.4834	2.4811	1.1779	0.2363	yes	up	B(ii)	-	-	-	-	-	-	-	HMDB0257752	Organic oxygen compounds	Organooxygen compounds	Alcohols and polyols	-	382.331	6.62943	M+CH3OH+Na	C20H41NO2	0	48.8	metab_4789	pos_4790	pos	47	5.746	0.1652	4.878	0.2472
7-Hydroxyoct-1-Enoylglycine	3.487e-05	0.002445	2.464	2.4428	1.2047	0.2686	yes	up	B(ii)	-	-	-	-	-	-	-	HMDB0094773	Organic acids and derivatives	Carboxylic acids and derivatives	Amino acids, peptides, and analogues	-	220.097	5.10602	M+Na-H2O	C10H17NO4	0	54.9	metab_3193	pos_3194	pos	47.8	4.744	0.07367	3.938	0.1785
2-Aminopyridine	0.01426	0.08895	2.419	2.3678	1.2411	0.3116	yes	up	B(i)	-	-	-	-	-	-	-	HMDB0245026	Organoheterocyclic compounds	Pyridines and derivatives	Aminopyridines and derivatives	-	112.087	1.19382	M+NH4	C5H6N2	52.6	0	metab_979	pos_980	pos	49	4.844	0.1112	3.903	0.6489
3H-Adrenaline	3.065e-06	0.0005146	2.3923	2.3839	1.1694	0.2258	yes	up	B(ii)	-	-	-	-	-	-	-	HMDB0246263	Organic oxygen compounds	Organooxygen compounds	Alcohols and polyols	-	186.112	5.00447	M+H	C9H15NO3	0	41.3	metab_3154	pos_3155	pos	47.1	5.198	0.1053	4.445	0.04064
1-Acetamidocyclopentanecarboxylic Acid	3.89e-07	0.0001302	2.3907	2.3705	1.1578	0.2114	yes	up	B(i)	-	-	-	-	-	-	-	-	-	-	-	-	172.097	3.72028	M+H	C8H13NO3	61.9	0	metab_8676	pos_8677	pos	51.3	5.423	0.0356	4.684	0.08333
Momordicoside E	0.01523	0.09266	2.3885	2.3092	1.2031	0.2667	yes	up	B(ii)	-	-	-	-	-	-	-	HMDB0035697	Lipids and lipid-like molecules	Steroids and steroid derivatives	Steroidal glycosides	78887-74-8	661.391	5.23872	M+H-2H2O	C37H60O12	0	67.6	metab_3254	pos_3255	pos	48.4	5.326	0.157	4.427	0.6149
Beta-D-Xylopyranoside,3,17-Dihydroxyspirost-5-En-1-Yl	0.03712	0.1606	2.3835	2.4099	1.2485	0.3202	yes	up	B(i)	-	-	-	-	-	-	-	-	-	-	-	-	579.356	6.0108	M+H	C32H50O9	59.8	0	metab_7354	pos_7355	pos	47.1	5.401	0.4958	4.326	0.7622
Lithocholic Acid	0.0006284	0.01306	2.3655	2.3609	1.1478	0.1989	yes	up	B(ii)	C03990	Steroids	24-Carbon atoms	map04976;map00121	Bile secretion;Secondary bile acid biosynthesis	Organismal Systems;Metabolism	Digestive system;Lipid metabolism	HMDB0000761	Lipids and lipid-like molecules	Steroids and steroid derivatives	Bile acids, alcohols and derivatives	434-13-9;	418.33	6.49037	M+ACN+H	C24H40O3	0	39.1	metab_4589	pos_4590	pos	45.9	6.166	0.2049	5.372	0.199
3',5,7-Trihydroxy-3'-Methoxyflavanone, Homoeriodictyol	7.769e-05	0.003888	2.3632	2.3326	1.1767	0.2347	yes	up	B(i)	-	-	-	-	-	-	-	-	-	-	-	-	301.075	4.39713	M-H	C16H14O6	63.1	0	metab_18146	neg_6955	neg	48	4.948	0.05367	4.205	0.1968
Levetiracetam	0.0001467	0.005664	2.3621	2.3512	1.1867	0.2469	yes	up	B(ii)	C07841	-	-	-	-	-	-	HMDB0015333	Organic acids and derivatives	Carboxylic acids and derivatives	Amino acids, peptides, and analogues	102767-28-2	229.119	4.24863	M+Hac-H	C8H14N2O2	0	44.5	metab_18217	neg_7026	neg	46.7	4.857	0.169	4.093	0.13
N-(Oxan-4-Ylmethyl)-1,3-Benzodioxole-5-Carboxamide	1.078e-05	0.001194	2.3522	2.3256	1.1526	0.2049	yes	up	B(i)	-	-	-	-	-	-	-	-	-	-	-	-	264.122	5.05915	M+H	C14H17NO4	59.2	0	metab_7948	pos_7949	pos	50.5	5.467	0.08344	4.743	0.113
5-(1-Benzyl-2,4-Dioxoquinazolin-3-Yl)-N-(Thiophen-2-Ylmethyl)Pentanamide	0.01455	0.09006	2.3521	2.2978	1.1979	0.2605	yes	up	B(i)	-	-	-	-	-	-	-	-	-	-	-	-	448.174	3.00687	M+H	C25H25N3O3S	41.2	0	metab_1932	pos_1933	pos	42.5	5.314	0.51	4.436	0.1934
A,15-Dihydroxydehydroabietic Acid	4.937e-05	0.002981	2.3153	2.3249	1.1811	0.2402	yes	up	B(i)	-	-	-	-	-	-	-	-	-	-	-	-	355.185	5.2699	M+Na	C20H28O4	40.8	0	metab_3266	pos_3267	pos	42.7	4.773	0.1526	4.041	0.0695
N-Linoleoyl Valine	0.001458	0.02127	2.3015	2.2966	1.1669	0.2227	yes	up	B(ii)	-	-	-	-	-	-	-	HMDB0241988	Organic acids and derivatives	Carboxylic acids and derivatives	Amino acids, peptides, and analogues	_;	380.315	6.56758	M+H	C23H41NO3	0	61.7	metab_4697	pos_4698	pos	49.4	5.398	0.2537	4.626	0.1861
Costunolide	0.0004574	0.01093	2.2952	2.2951	1.1799	0.2386	yes	up	B(ii)	C09382	-	-	map01110;map00909	Biosynthesis of secondary metabolites;Sesquiterpenoid and triterpenoid biosynthesis	Metabolism;Metabolism	Global and overview maps;Metabolism of terpenoids and polyketides	HMDB0036688	Lipids and lipid-like molecules	Prenol lipids	Terpene lactones	553-21-9	253.119	4.68668	M+Na-2H	C15H20O2	0	40.4	metab_13225	neg_2034	neg	44.1	4.9	0.1704	4.153	0.1925
1-Hydroxy-1-Phenyl-3-Octadecanone	0.0003496	0.009267	2.289	2.2574	1.146	0.1966	yes	up	B(ii)	-	-	-	-	-	-	-	HMDB0035679	Lipids and lipid-like molecules	Fatty Acyls	Fatty alcohols	-	402.336	6.62943	M+ACN+H	C24H40O2	0	44.5	metab_6320	pos_6321	pos	45.5	5.621	0.139	4.905	0.1954
Biopterin	0.001602	0.02253	2.2552	2.2665	1.2095	0.2744	yes	up	B(i)	C06313	-	-	map01100;map00790;map01240	Metabolic pathways;Folate biosynthesis;Biosynthesis of cofactors	Metabolism;Metabolism;Metabolism	Global and overview maps;Metabolism of cofactors and vitamins;Global and overview maps	HMDB0000468;HMDB0251210;HMDB0000468	Organoheterocyclic compounds	Pteridines and derivatives	Pterins and derivatives	22150-76-1	238.092	1.02245	M+H	C9H11N5O3	61.7	0	metab_10250	pos_10251	pos	48.4	4.336	0.2842	3.585	0.1023
4-Acetamidobenzaldehyde	0.0006761	0.01347	2.2319	2.2632	1.1924	0.2538	yes	up	B(i)	-	-	-	-	-	-	-	-	-	-	-	-	164.07	5.78483	M+H	C9H9NO2	74.3	0	metab_3506	pos_3507	pos	52.6	4.531	0.2339	3.8	0.09982
Pirmenol	0.005693	0.04982	2.2208	2.2573	1.18	0.2388	yes	up	B(ii)	-	-	-	-	-	-	-	HMDB0256607	Benzenoids	Benzene and substituted derivatives	Phenylbutylamines	-	361.225	2.77962	M+Na	C22H30N2O	0	44.3	metab_9400	pos_9401	pos	45.1	5.224	0.08866	4.427	0.4504
Bucladesine	0.004852	0.04507	2.2099	2.2339	1.1634	0.2183	yes	up	B(ii)	-	-	-	-	-	-	-	HMDB0249421	Nucleosides, nucleotides, and analogues	Purine nucleotides	Cyclic purine nucleotides	-	474.111	0.620767	M+Na-H2O	C18H24N5O8P	0	65.5	metab_10708	pos_10709	pos	48.2	5.511	0.1716	4.737	0.3869
Prolylproline	7.339e-05	0.003753	2.1964	2.1684	1.1336	0.1809	yes	up	B(i)	-	-	-	-	-	-	-	HMDB0011180	Organic acids and derivatives	Carboxylic acids and derivatives	Amino acids, peptides, and analogues	20488-28-2	425.238	2.72475	2M+H	C10H16N2O3	38.4	0	metab_9449	pos_9450	pos	45.9	5.448	0.1258	4.806	0.1008
(2R,3S,4S,5R,6S)-2-(Hydroxymethyl)-6-[4-(3-Hydroxyprop-1-Enyl)-2,6-Dimethoxyphenoxy]Oxane-3,4,5-Triol	0.0001096	0.00472	2.1875	2.1669	1.123	0.1674	yes	up	B(ii)	-	-	-	-	-	-	-	HMDB0242525	Organic oxygen compounds	Organooxygen compounds	Carbohydrates and carbohydrate conjugates	-	436.155	0.643683	M+ACN+Na	C17H24O9	0	68.7	metab_10631	pos_10632	pos	49.7	5.896	0.0677	5.25	0.1723
Aplysiatoxin, 17-Debromo-	0.001565	0.02223	2.1859	2.2078	1.1076	0.1474	yes	up	B(ii)	-	-	-	-	-	-	-	HMDB0248517	Not Available	Not Available	Not Available	-	593.332	5.7069	M+H	C32H48O10	0	60	metab_7653	pos_7654	pos	51.6	7.351	0.2648	6.637	0.111
Oxycodone	5.961e-06	0.0008113	2.1691	2.1367	1.1297	0.176	yes	up	B(ii)	C08018	-	-	-	-	-	-	HMDB0014640	Benzenoids	Phenanthrenes and derivatives	Not Available	76-42-6	360.148	6.90718	M+FA-H	C18H21NO4	0	43.5	metab_16019	neg_4828	neg	43.1	5.304	0.0849	4.695	0.05883
4-Coumaroyl-2-Hydroxyputrescine	4.419e-05	0.002784	2.1457	2.118	1.1119	0.153	yes	up	B(ii)	-	-	-	-	-	-	-	HMDB0033462	Phenylpropanoids and polyketides	Cinnamic acids and derivatives	Hydroxycinnamic acids and derivatives	24177-22-8	273.123	5.34017	M+Na	C13H18N2O3	0	42	metab_3297	pos_3298	pos	46.4	6.051	0.0805	5.442	0.1239
Pentadecanedioylcarnitine	0.0003517	0.00929	2.1295	2.12	1.1449	0.1952	yes	up	B(ii)	-	-	-	-	-	-	-	HMDB0241457	Lipids and lipid-like molecules	Fatty Acyls	Fatty acid esters	-	396.275	6.33945	M-H2O-H	C22H41NO6	0	42.4	metab_14524	neg_3333	neg	43.7	5.001	0.181	4.368	0.07909
1-[2-(1,3-Benzodioxol-5-Yl)-2-Hydroxypropyl]-3-Cyclohexylurea	0.0002637	0.007838	2.1099	2.1107	1.1227	0.167	yes	up	B(i)	-	-	-	-	-	-	-	-	-	-	-	-	321.18	5.94852	M+H	C17H24N2O4	50.4	0	metab_3658	pos_3659	pos	45.8	5.691	0.1548	5.069	0.1101
1-(2-Morpholinophenyl)Dihydro-1H-Pyrrole-2,5-Dione	0.0001258	0.005238	2.1072	2.0939	1.1359	0.1838	yes	up	B(i)	-	-	-	-	-	-	-	-	-	-	-	-	261.123	5.55085	M+H	C14H16N2O3	46.4	0	metab_7716	pos_7717	pos	45.7	5.041	0.1096	4.438	0.129
Blumealactone C	0.000823	0.01505	2.103	2.1031	1.1449	0.1952	yes	up	B(ii)	-	-	-	-	-	-	-	HMDB0035357	Lipids and lipid-like molecules	Prenol lipids	Terpene lactones	111545-48-3	363.121	4.33177	M+K	C17H24O6	0	41.3	metab_2796	pos_2797	pos	45.5	5.033	0.1418	4.396	0.2012
7(14)-Bisabolene-2,3,10,11-Tetrol	0.04738	0.1863	2.0808	2.0851	1.2079	0.2725	yes	up	B(ii)	-	-	-	-	-	-	-	HMDB0035918	Lipids and lipid-like molecules	Prenol lipids	Sesquiterpenoids	122470-42-2	543.39	6.37145	2M-H	C15H28O4	0	40	metab_14570	neg_3379	neg	47	4.782	0.5377	3.959	0.4723
Fluvoxamino Acid	5.943e-05	0.00335	2.0743	2.0517	1.1355	0.1833	yes	up	B(ii)	-	-	-	-	-	-	-	HMDB0060950	Benzenoids	Benzene and substituted derivatives	Trifluoromethylbenzenes	88699-91-6	317.114	5.57527	M-H	C14H17F3N2O3	0	46.2	metab_13653	neg_2462	neg	45.7	4.803	0.1035	4.23	0.09504
N-Ethyl-4-Methoxyamphetamine	0.0005987	0.01277	2.0659	2.0281	1.129	0.1751	yes	up	B(i)	-	-	-	-	-	-	-	-	-	-	-	-	257.164	3.24057	M+ACN+Na	C12H19NO	41.6	0	metab_9003	pos_9004	pos	44.8	5.137	0.08729	4.55	0.2027
Polypropylene	0.00726	0.05812	2.0658	2.1052	1.1539	0.2066	yes	up	B(ii)	C19505;_	-	-	-	-	-	-	HMDB0255988	Lipids and lipid-like molecules	Fatty Acyls	Fatty acids and conjugates	9003-07-0;_	396.346	6.76005	M+ACN+H	C22H42O3	0	52.5	metab_4909	pos_4910	pos	47.8	5.292	0.2335	4.586	0.3349
5-(14-Nonadecenyl)-1,3-Benzenediol	0.01313	0.08477	2.0655	2.0139	1.1504	0.2022	yes	up	B(ii)	-	-	-	-	-	-	-	HMDB0031677	Benzenoids	Phenols	Benzenediols	187523-39-3	429.334	6.86803	M+CH3OH+Na	C25H42O2	0	58.2	metab_6086	pos_6087	pos	46.7	5.124	0.385	4.454	0.1278
Cyclohexanecarboxylic Acid	0.0002202	0.007088	2.0647	2.0622	1.1124	0.1537	yes	up	B(ii)	C09822	-	-	map01100;map00362;map01120	Metabolic pathways;Benzoate degradation;Microbial metabolism in diverse environments	Metabolism;Metabolism;Metabolism	Global and overview maps;Xenobiotics biodegradation and metabolism;Global and overview maps	HMDB0031342	Organic acids and derivatives	Carboxylic acids and derivatives	Carboxylic acids	98-89-5	255.16	6.21993	2M-H	C7H12O2	0	48.9	metab_14337	neg_3146	neg	48.5	5.857	0.1477	5.265	0.09216
Lumichrome	0.00419	0.04093	2.0602	2.0762	1.1481	0.1992	yes	up	B(i)	C01727	-	-	map00740	Riboflavin metabolism	Metabolism	Metabolism of cofactors and vitamins	HMDB0254199	Organoheterocyclic compounds	Pteridines and derivatives	Alloxazines and isoalloxazines	1086-80-2;_	243.087	5.44942	M+H	C12H10N4O2	90.9	0	metab_3353	pos_3354	pos	56.2	5.132	0.2489	4.47	0.2192
Dalcetrapib	0.03191	0.1457	2.0575	2.0468	1.177	0.2351	yes	up	B(ii)	-	-	-	-	-	-	-	HMDB0250834	Benzenoids	Benzene and substituted derivatives	Anilides	-	394.219	6.9999	M+Na-H2O	C23H35NO2S	0	70.4	metab_5974	pos_5975	pos	50.3	5.08	0.3468	4.316	0.5134
Cervonoyl Ethanolamide	0.02776	0.1335	2.0344	1.9709	1.1455	0.196	yes	up	B(ii)	C13828	-	-	-	-	-	-	HMDB0013627	Lipids and lipid-like molecules	Fatty Acyls	Fatty acid esters	-	337.252	7.87243	M+H-2H2O	C24H36O3	0	82.5	metab_5517	pos_5518	pos	54.5	5.51	0.4496	4.81	0.2476
2-[(3,5-Difluorophenyl)Methylamino]-N,N-Diethylquinoxaline-6-Sulfonamide	3.541e-05	0.002453	2.033	2.0069	1.1133	0.1548	yes	up	B(i)	-	-	-	-	-	-	-	-	-	-	-	-	407.136	4.66873	M+H	C19H20F2N4O2S	73.2	0	metab_2988	pos_2989	pos	51.3	5.357	0.09041	4.812	0.08417
Phenylpropionylglycine	2.965e-06	0.0005121	2.0324	2.028	1.1288	0.1748	yes	up	B(i)	-	-	-	-	-	-	-	HMDB0000860	Organic acids and derivatives	Carboxylic acids and derivatives	Amino acids, peptides, and analogues	56613-60-6	271.107	4.03362	M+ACN+Na	C11H13NO3	44.8	0	metab_8485	pos_8486	pos	45.7	4.777	0.07638	4.232	0.02767
Avenanthramide C	0.0002658	0.007845	2.0216	2.0172	1.1174	0.1602	yes	up	B(ii)	C22372;_	-	-	-	-	-	-	HMDB0038576	Phenylpropanoids and polyketides	Cinnamic acids and derivatives	Hydroxycinnamic acids and derivatives	116764-15-9;_	333.111	4.35583	M+NH4	C16H13NO6	0	43.2	metab_8322	pos_8323	pos	45.3	5.415	0.1021	4.846	0.1516
Alpha-Eleostearic Acid	0.0001083	0.00468	2.0189	1.9848	1.119	0.1622	yes	up	B(ii)	C08315;_	-	-	-	-	-	-	HMDB0248208	Lipids and lipid-like molecules	Fatty Acyls	Lineolic acids and derivatives	506-23-0;_;	301.211	5.78483	M+Na	C18H30O2	0	42.9	metab_3507	pos_3508	pos	43.9	5.096	0.06195	4.554	0.1413
13'-Carboxy-Alpha-Tocopherol	0.0002741	0.008031	2.0115	1.9817	1.1088	0.1489	yes	up	B(ii)	-	-	-	-	-	-	-	HMDB0012555	Lipids and lipid-like molecules	Prenol lipids	Quinone and hydroquinone lipids	_;	461.361	6.6602	M+H	C29H48O4	0	41.8	metab_4830	pos_4831	pos	43.7	5.607	0.1206	5.057	0.124
Gly Lys Phe	0.000212	0.006934	2.0057	1.9823	1.0987	0.1358	yes	up	B(i)	-	-	-	-	-	-	-	-	-	-	-	-	351.202	5.82385	M+H	C17H26N4O4	37.8	0	metab_3538	pos_3539	pos	45.8	6.09	0.1368	5.543	0.08195
4'-Aminoacetanilide	0.0001285	0.005243	1.9989	1.9961	1.1011	0.139	yes	up	B(i)	-	-	-	-	-	-	-	-	-	-	-	-	168.113	0.991283	M+NH4	C8H10N2O	37.1	0	metab_10294	pos_10295	pos	45.2	5.988	0.1334	5.438	0.0594
3,5-Dihydroxyphenylglycine	0.01247	0.0823	1.9896	1.9224	1.1446	0.1948	yes	up	B(i)	-	-	-	-	-	-	-	HMDB0243702	Organic acids and derivatives	Carboxylic acids and derivatives	Amino acids, peptides, and analogues	-	365.099	2.05525	2M-H	C8H9NO4	49	0	metab_12319	neg_1128	neg	48.9	4.845	0.2827	4.233	0.2609
Loganic Acid	0.01862	0.1046	1.9862	1.9986	1.1768	0.2349	yes	up	B(i)	C01512	-	-	map01110;map00902	Biosynthesis of secondary metabolites;Monoterpenoid biosynthesis	Metabolism;Metabolism	Global and overview maps;Metabolism of terpenoids and polyketides	-;LMPR01020138	-	-	-	22255-40-9;	411.108	4.4885	M+Cl	C16H24O10	83.1	0	metab_13149	neg_1958	neg	53.2	4.579	0.3054	3.891	0.3744
(R)-Ruxolitinib	0.03137	0.1442	1.9842	1.9441	1.1205	0.1641	yes	up	B(ii)	-	-	-	-	-	-	-	HMDB0243698	Organoheterocyclic compounds	Pyrrolopyrimidines	Pyrrolo[2,3-d]pyrimidines	-	345.122	2.14585	M+K	C17H18N6	0	49.5	metab_1401	pos_1402	pos	48	6.287	0.4743	5.611	0.1713
9,10,13-Trihome	1.047e-06	0.0002548	1.9648	1.952	1.1141	0.1559	yes	up	B(ii)	C14835;_	-	-	map00591	Linoleic acid metabolism	Metabolism	Lipid metabolism	HMDB0004710	Lipids and lipid-like molecules	Fatty Acyls	Fatty acids and conjugates	-;29907-57-1	369.201	5.17628	M+K	C18H34O5	0	48.5	metab_7901	pos_7902	pos	44.9	4.912	0.05286	4.409	0.04031
2,4,12-Octadecatrienoic Acid Isobutylamide	0.005427	0.04834	1.9595	1.9308	1.1216	0.1655	yes	up	B(ii)	-	-	-	-	-	-	-	HMDB0032033	Lipids and lipid-like molecules	Fatty Acyls	Fatty amides	151391-69-4	334.309	7.06937	M+H	C22H39NO	0	48.3	metab_5915	pos_5916	pos	46.6	5.35	0.2065	4.77	0.2325
4-(4-Tert-Butyl-1,3-Thiazol-2-Yl)-N-(Cyclohexylmethyl)Thiophene-2-Sulfonamide	0.02412	0.1221	1.9546	1.9903	1.1831	0.2426	yes	up	B(i)	-	-	-	-	-	-	-	-	-	-	-	-	399.127	3.9238	M+H	C18H26N2O2S3	90.9	0	metab_8538	pos_8539	pos	51.3	4.536	0.3623	3.834	0.3685
Lappaol C	0.0327	0.148	1.9534	1.9306	1.171	0.2278	yes	up	B(ii)	C17686;_	-	-	-	-	-	-	HMDB0301813	Lignans, neolignans and related compounds	Furanoid lignans	Tetrahydrofuran lignans	-;64855-00-1	575.191	7.43828	M+Na-2H	C30H34O10	0	54.5	metab_15838	neg_4647	neg	45.4	4.683	0.3939	3.999	0.37
Citrusin B	0.001228	0.0192	1.9406	1.8975	1.0942	0.1298	yes	up	B(ii)	-	-	-	-	-	-	-	HMDB0039231	Lignans, neolignans and related compounds	Lignan glycosides	Not Available	105279-10-5	591.208	3.82228	M+Na	C27H36O13	0	61.7	metab_8595	pos_8596	pos	49.8	6.112	0.1885	5.586	0.07219
Threonylisoleucine	0.0005782	0.01257	1.9335	1.9325	1.1003	0.1379	yes	up	B(ii)	-	-	-	-	-	-	-	HMDB0029064	Organic acids and derivatives	Carboxylic acids and derivatives	Amino acids, peptides, and analogues	129050-49-3	255.133	4.1586	M+Na	C10H20N2O4	0	60.9	metab_2698	pos_2699	pos	48.7	5.837	0.1375	5.305	0.1284
4-Ethyl-N-(3-Phenylpropyl)Thieno[3,2-B]Pyrrole-5-Carboxamide	7.716e-05	0.003885	1.9155	1.9139	1.116	0.1584	yes	up	B(i)	-	-	-	-	-	-	-	-	-	-	-	-	313.139	4.1664	M+H	C18H20N2OS	72	0	metab_2702	pos_2703	pos	49.7	4.819	0.09343	4.318	0.08754
Docosadienoate (22:2N6)	0.005693	0.04982	1.8921	1.8797	1.1128	0.1542	yes	up	B(ii)	C16533	Lipids	Fatty acids	map01040	Biosynthesis of unsaturated fatty acids	Metabolism	Lipid metabolism	HMDB0061714	Lipids and lipid-like molecules	Fatty Acyls	Fatty acids and conjugates	17735-98-7	354.336	6.62178	M+NH4	C22H40O2	0	44.6	metab_6327	pos_6328	pos	45.2	5.446	0.2202	4.894	0.1943
N-Acetylcadaverine	0.004544	0.04346	1.8819	1.9131	1.1381	0.1867	yes	up	B(i)	-	-	-	-	-	-	-	HMDB0002284	Organic acids and derivatives	Carboxylic acids and derivatives	Carboxylic acid derivatives	32343-73-0	145.133	2.92875	M+H	C7H16N2O	68.9	0	metab_1854	pos_1855	pos	52.5	4.589	0.2083	4.032	0.1935
N-(3-Aminopropyl)Morpholine	0.0006967	0.01376	1.8768	1.8457	1.0807	0.1119	yes	up	B(i)	-	-	-	-	-	-	-	-	-	-	-	-	145.133	1.02245	M+H	C7H16N2O	60.7	0	metab_10260	pos_10261	pos	50.2	6.537	0.06472	6.049	0.178
5-Methoxytryptophan	0.005451	0.04847	1.8765	1.8469	1.1319	0.1787	yes	up	B(ii)	-	-	-	-	-	-	-	HMDB0002339	Organoheterocyclic compounds	Indoles and derivatives	Tryptamines and derivatives	2504-22-5	199.086	3.25615	M+H-2H2O	C12H14N2O3	0	46.7	metab_2133	pos_2134	pos	46.5	4.584	0.1185	4.05	0.2748
(2S,3S,4S,5R)-3,4,5-Trihydroxy-6-(5-Methyl-2-Propan-2-Ylphenoxy)Oxane-2-Carboxylic Acid	0.0006667	0.0134	1.8735	1.8745	1.117	0.1596	yes	up	B(ii)	-	-	-	-	-	-	-	HMDB0255323	Lipids and lipid-like molecules	Prenol lipids	Terpene glycosides	-	361.107	4.8486	M+Cl	C16H22O7	0	87	metab_13290	neg_2099	neg	54.1	4.794	0.1018	4.292	0.1587
7-Methyl-2-(4-Pyrimidin-2-Ylpiperazin-1-Yl)-7,8-Dihydro-6H-Quinazolin-5-One	0.0001278	0.005243	1.8623	1.8577	1.0944	0.1302	yes	up	B(i)	-	-	-	-	-	-	-	-	-	-	-	-	325.175	5.54307	M+H	C17H20N6O	78.8	0	metab_3408	pos_3409	pos	51.3	5.516	0.04979	5.04	0.1308
N-(3,4-Difluorophenyl)-2-Methyl-7-Oxoazepane-2-Carboxamide	8.059e-05	0.003958	1.8601	1.8444	1.1043	0.1431	yes	up	B(i)	-	-	-	-	-	-	-	-	-	-	-	-	283.128	4.22965	M+H	C14H16F2N2O2	45.3	0	metab_8384	pos_8385	pos	44.4	4.934	0.1035	4.468	0.05081
Goshuyic Acid	0.0006266	0.01304	1.8588	1.8396	1.0983	0.1352	yes	up	B(ii)	-	-	-	-	-	-	-	HMDB0000560	Lipids and lipid-like molecules	Fatty Acyls	Fatty acids and conjugates	39039-37-7;	242.211	6.0108	M+NH4	C14H24O2	0	51.8	metab_3753	pos_3754	pos	48.2	5.41	0.1228	4.926	0.1234
N-(2-Methylphenyl)-2-(4-Methylsulfanylphenyl)Imidazo[1,2-A]Pyrazin-3-Amine	0.01392	0.08753	1.8556	1.8755	1.1411	0.1904	yes	up	B(i)	-	-	-	-	-	-	-	-	-	-	-	-	347.135	2.78743	M+H	C20H18N4S	37.5	0	metab_1737	pos_1738	pos	41.7	4.771	0.1699	4.181	0.3627
Lys Gly Tyr	0.00436	0.04211	1.8524	1.8279	1.1083	0.1483	yes	up	B(i)	-	-	-	-	-	-	-	-	-	-	-	-	367.198	5.49622	M+H	C17H26N4O5	50.3	0	metab_3386	pos_3387	pos	46.5	5.252	0.2176	4.739	0.1294
Tetrahydrodeoxycorticosterone	0.0001726	0.006187	1.833	1.8191	1.0882	0.1219	yes	up	B(ii)	C13713	-	-	map00140	Steroid hormone biosynthesis	Metabolism	Lipid metabolism	HMDB0000879	Lipids and lipid-like molecules	Steroids and steroid derivatives	Hydroxysteroids	567-03-3;	339.227	5.97968	M+Na-H2O	C21H34O3	0	47.6	metab_3698	pos_3699	pos	44.2	5.653	0.1107	5.195	0.06712
Cadaverine	0.0128	0.08345	1.8248	1.8495	1.1175	0.1603	yes	up	B(i)	C01672	-	-	map01100;map00310;map01110;map01120;map00960;map00470;map00480;map04974;map01064;map01060	Metabolic pathways;Lysine degradation;Biosynthesis of secondary metabolites;Microbial metabolism in diverse environments;Tropane, piperidine and pyridine alkaloid biosynthesis;D-Amino acid metabolism;Glutathione metabolism;Protein digestion and absorption;Biosynthesis of alkaloids derived from ornithine, lysine and nicotinic acid;Biosynthesis of plant secondary metabolites	Metabolism;Metabolism;Metabolism;Metabolism;Metabolism;Metabolism;Metabolism;Organismal Systems;Metabolism;Metabolism	Global and overview maps;Amino acid metabolism;Global and overview maps;Global and overview maps;Biosynthesis of other secondary metabolites;Metabolism of other amino acids;Metabolism of other amino acids;Digestive system;Chemical structure transformation maps;Chemical structure transformation maps	HMDB0002322	Organic nitrogen compounds	Organonitrogen compounds	Amines	462-94-2	103.123	0.5285	M+H	C5H14N2	92.7	0	metab_11013	pos_11014	pos	56.8	5.392	0.1932	4.825	0.3192
Dihomo-Gamma-Linolenoyl-Ea	0.00771	0.06049	1.823	1.8306	1.111	0.1519	yes	up	B(i)	C13828	-	-	-	-	-	-	LMFA08040011	-	-	-	--	350.305	6.5907	M+H	C22H39NO2	53.5	0	metab_4742	pos_4743	pos	47.3	5.345	0.191	4.811	0.2444
(6R,7R)-6-Methoxy-3,7-Dimethyl-8-Oxo-5-Thia-1-Azabicyclo[4.2.0]Oct-2-Ene-2-Carboxylic Acid	6.455e-05	0.003529	1.8065	1.8149	1.1036	0.1422	yes	up	B(ii)	-	-	-	-	-	-	-	HMDB0258050	Organic acids and derivatives	Carboxylic acids and derivatives	Amino acids, peptides, and analogues	-	208.042	4.536	M+H-2H2O	C10H13NO4S	0	53.5	metab_8212	pos_8213	pos	47.9	4.773	0.1019	4.325	0.02743
N-(5-Acetamidopentyl)Acetamide	0.009351	0.06924	1.8003	1.8241	1.0991	0.1364	yes	up	B(i)	-	-	-	-	-	-	-	-	-	-	-	-	187.144	2.92875	M+H	C9H18N2O2	72.2	0	metab_9271	pos_9272	pos	53.7	5.854	0.2094	5.326	0.2372
1-[3-[3-(Dimethylamino)Pyrazin-2-Yl]Oxypyrrolidin-1-Yl]-2-Methoxyethanone	0.04085	0.1704	1.7893	1.741	1.1182	0.1612	yes	up	B(i)	-	-	-	-	-	-	-	-	-	-	-	-	281.16	2.59177	M+H	C13H20N4O3	77.4	0	metab_1529	pos_1530	pos	52.2	5.306	0.4207	4.745	0.1574
Leu Glu	0.0003192	0.008786	1.7833	1.7616	1.0896	0.1238	yes	up	B(i)	-	-	-	-	-	-	-	-	-	-	-	-	261.144	1.61452	M+H	C11H20N2O5	37.2	0	metab_10049	pos_10050	pos	44.7	5.291	0.1143	4.856	0.07445
6-Hydroxy-8-Heneicosanone	0.001577	0.02231	1.7655	1.7541	1.0774	0.1076	yes	up	B(ii)	-	-	-	-	-	-	-	HMDB0035668	Lipids and lipid-like molecules	Fatty Acyls	Fatty alcohols	-	368.351	6.67555	M+ACN+H	C21H42O2	0	69	metab_4843	pos_4844	pos	52.4	6.29	0.14	5.838	0.1281
N-(3-Indolylacetyl)-L-Isoleucine	3.373e-05	0.002401	1.7549	1.7414	1.0797	0.1106	yes	up	B(i)	-	-	-	-	-	-	-	-	-	-	-	-	289.154	5.28553	M+H	C16H20N2O3	76	0	metab_7849	pos_7850	pos	53.3	5.556	0.03973	5.146	0.08903
(5E,7E)-Undeca-2,5,7-Trienedioylcarnitine	0.007512	0.05943	1.7506	1.719	1.1054	0.1446	yes	up	B(ii)	-	-	-	-	-	-	-	HMDB0241202	Lipids and lipid-like molecules	Fatty Acyls	Fatty acid esters	-	388.154	5.72295	M+Cl	C18H27NO6	0	77.6	metab_17544	neg_6353	neg	52	4.929	0.2076	4.459	0.16
2,8-Quinolinediol	0.0006125	0.01294	1.7499	1.7445	1.0991	0.1363	yes	up	B(i)	C06342	-	-	-	-	-	-	HMDB0240311	Organoheterocyclic compounds	Quinolines and derivatives	Quinolones and derivatives	15450-76-7	162.055	3.38997	M+H	C9H7NO2	79.8	0	metab_2232	pos_2233	pos	53.6	4.803	0.1405	4.37	0.04147
L-Saccharopine	0.002003	0.02567	1.7435	1.7471	1.1106	0.1514	yes	up	B(i)	C00449	-	-	map01100;map00310;map01110;map00300;map01230	Metabolic pathways;Lysine degradation;Biosynthesis of secondary metabolites;Lysine biosynthesis;Biosynthesis of amino acids	Metabolism;Metabolism;Metabolism;Metabolism;Metabolism	Global and overview maps;Amino acid metabolism;Global and overview maps;Amino acid metabolism;Global and overview maps	HMDB0000279	Organic acids and derivatives	Carboxylic acids and derivatives	Amino acids, peptides, and analogues	997-68-2	257.114	1.38162	M-H2O-H	C11H20N2O6	55.5	0	metab_19166	neg_7975	neg	48.7	4.548	0.1663	4.095	0.09789
4-(4-Fluorophenyl)-1-Methyl-N-(2-Piperidin-1-Ylethyl)Pyrrole-2-Carboxamide	0.0001856	0.00645	1.737	1.7196	1.0919	0.1269	yes	up	B(i)	-	-	-	-	-	-	-	-	-	-	-	-	330.201	4.864	M+H	C19H24FN3O	40.1	0	metab_3075	pos_3076	pos	41.9	4.87	0.05329	4.46	0.1154
Imidazolone A	0.0004424	0.01067	1.7344	1.7138	1.0833	0.1154	yes	up	B(ii)	-	-	-	-	-	-	-	HMDB0253421	Organic acids and derivatives	Carboxylic acids and derivatives	Amino acids, peptides, and analogues	-	301.15	0.666417	M+H-H2O	C12H22N4O6	0	42.2	metab_537	pos_538	pos	45	5.411	0.05921	4.995	0.1363
3-Methyldioxyindole	0.0003701	0.009619	1.729	1.7221	1.0977	0.1344	yes	up	B(ii)	C05834	-	-	map00380	Tryptophan metabolism	Metabolism	Amino acid metabolism	HMDB0004186	Organoheterocyclic compounds	Indoles and derivatives	Indolines	-;3040-34-4	181.097	4.03362	M+NH4	C9H9NO2	0	41.2	metab_2640	pos_2641	pos	46.2	4.698	0.1175	4.28	0.06123
4-Formylaminoantipyrine	0.02631	0.1292	1.7277	1.6772	1.0841	0.1165	yes	up	B(ii)	-	-	-	-	-	-	-	HMDB0246429	Organoheterocyclic compounds	Azoles	Pyrazoles	-	249.134	2.14585	M+NH4	C12H13N3O2	0	52.1	metab_1400	pos_1401	pos	49.1	6.391	0.3338	5.895	0.1154
4-Methylpyrimidine	0.0002224	0.00713	1.7262	1.7274	1.0816	0.1132	yes	up	B(i)	-	-	-	-	-	-	-	-	-	-	-	-	95.0607	0.728	M+H	C5H6N2	81	0	metab_692	pos_693	pos	54.6	5.5	0.06361	5.085	0.1147
Diterpene Alkaloid	0.009694	0.07086	1.7218	1.7033	1.0899	0.1242	yes	up	B(ii)	-	-	-	-	-	-	-	HMDB0251489	Lipids and lipid-like molecules	Prenol lipids	Diterpenoids	-	406.294	7.73992	M+H	C24H39NO4	0	53.2	metab_5456	pos_5457	pos	48.8	5.724	0.2012	5.252	0.1977
[2-(Benzenesulfonyl)-2-Azaspiro[4.5]Decan-4-Yl]-Morpholin-4-Ylmethanone	0.01405	0.08813	1.7119	1.7073	1.1087	0.1489	yes	up	B(i)	-	-	-	-	-	-	-	-	-	-	-	-	393.186	2.69353	M+H	C20H28N2O4S	46.9	0	metab_1569	pos_1570	pos	43.4	4.986	0.24	4.497	0.2015
Pumiliotoxin A	0.0009052	0.01587	1.711	1.7044	1.0879	0.1215	yes	up	B(ii)	C20033;_	-	-	-	-	-	-	HMDB0256924	Alkaloids and derivatives	Pumiliotoxins, homopumiliotoxins, and allopumiliotoxins	Not Available	67054-00-6;_	349.284	6.03417	M+ACN+H	C19H33NO2	0	47.7	metab_7329	pos_7330	pos	45.3	5.198	0.101	4.778	0.1284
2-Carboxy-1-[5-(2-Carboxy-1-Pyrrolidinyl)-2-Hydroxy-2,4-Pentadienylidene]Pyrrolidinium	0.0002922	0.008262	1.7092	1.6952	1.0799	0.1109	yes	up	B(ii)	-	-	-	-	-	-	-	HMDB0035173	Organic acids and derivatives	Carboxylic acids and derivatives	Amino acids, peptides, and analogues	214150-43-3	309.144	2.52187	M+H	C15H20N2O5	0	63.9	metab_9625	pos_9626	pos	49.8	5.446	0.03846	5.043	0.1307
Alanine Conjugated Chenodeoxycholic Acid	0.01396	0.08778	1.7071	1.6529	1.0853	0.1182	yes	up	B(i)	-	-	-	-	-	-	-	-	-	-	-	-	446.325	6.2813	M+H-H2O	C27H45NO5	61.9	0	metab_6874	pos_6875	pos	47.2	5.837	0.176	5.378	0.248
Furofoline	1.267e-05	0.001288	1.706	1.7002	1.0859	0.1189	yes	up	B(ii)	C10681	-	-	-	-	-	-	HMDB0034319	Organoheterocyclic compounds	Quinolines and derivatives	Benzoquinolines	62541-22-4	307.11	4.88742	M+ACN+H	C16H11NO3	0	45.7	metab_8038	pos_8039	pos	45	4.903	0.0428	4.515	0.06476
Lysopc(14:1(9Z)/0:0)	0.0195	0.1077	1.7028	1.7225	1.1186	0.1617	yes	up	B(ii)	C04230	Lipids	Phospholipids	map00564;map05231	Glycerophospholipid metabolism;Choline metabolism in cancer	Metabolism;Human Diseases	Lipid metabolism;Cancer: overview	HMDB0010380	Lipids and lipid-like molecules	Glycerophospholipids	Glycerophosphocholines	-	470.264	5.44942	M+Na-H2O	C22H44NO7P	0	42.7	metab_7769	pos_7770	pos	46.3	4.82	0.3337	4.309	0.02743
Indole-3-Acetyl-L-Valine	9.771e-09	2.242e-05	1.6915	1.6854	1.076	0.1057	yes	up	B(i)	-	-	-	-	-	-	-	-	-	-	-	-	275.138	4.62188	M+H	C15H18N2O3	80.3	0	metab_2956	pos_2957	pos	52.2	5.251	0.02337	4.88	0.004764
4-Coumaroylputrescine	0.03573	0.1563	1.6888	1.7365	1.1503	0.202	yes	up	B(ii)	-	-	-	-	-	-	-	HMDB0033461	Phenylpropanoids and polyketides	Cinnamic acids and derivatives	Hydroxycinnamic acids and derivatives	34136-53-3	279.135	3.65382	M+FA-H	C13H18N2O2	0	66.6	metab_18533	neg_7342	neg	50.8	4.27	0.317	3.712	0.3262
Riboflavin	0.01586	0.09486	1.6879	1.7055	1.0867	0.1199	yes	up	B(i)	C00255;_	Vitamins and cofactors;-	Vitamins;-	map01100;map01110;map01240;map02010;map04977;map00740	Metabolic pathways;Biosynthesis of secondary metabolites;Biosynthesis of cofactors;ABC transporters;Vitamin digestion and absorption;Riboflavin metabolism	Metabolism;Metabolism;Metabolism;Environmental Information Processing;Organismal Systems;Metabolism	Global and overview maps;Global and overview maps;Global and overview maps;Membrane transport;Digestive system;Metabolism of cofactors and vitamins	HMDB0000244;HMDB0247501;PW_C000165	Organoheterocyclic compounds	Pteridines and derivatives	Alloxazines and isoalloxazines	83-88-5;_	377.145	3.9238	M+H	C17H20N4O6	96.8	0	metab_2588	pos_2589	pos	58.1	6.168	0.2595	5.676	0.1887
2-Benzyl-7-Oxoazepane-2-Carboxylic Acid	0.0003582	0.00943	1.6872	1.6511	1.0915	0.1263	yes	up	B(i)	-	-	-	-	-	-	-	-	-	-	-	-	248.128	4.44235	M+H	C14H17NO3	64.3	0	metab_8261	pos_8262	pos	50.3	4.582	0.09924	4.198	0.07328
N-Benzyl-3-[(3-Propan-2-Yl-1,2,4-Oxadiazol-5-Yl)Methoxy]Piperidine-1-Carboxamide	0.004967	0.04564	1.6688	1.6784	1.097	0.1335	yes	up	B(i)	-	-	-	-	-	-	-	-	-	-	-	-	359.21	3.094	M+H	C19H26N4O3	48.7	0	metab_9126	pos_9127	pos	47.4	4.955	0.08017	4.517	0.229
Cyanoketone	0.009314	0.06906	1.6674	1.6492	1.0941	0.1298	yes	up	B(ii)	-	-	-	-	-	-	-	HMDB0250613	Lipids and lipid-like molecules	Steroids and steroid derivatives	Androstane steroids	-	410.264	5.4806	M+CH3OH+Na	C23H33NO2	0	41.1	metab_7752	pos_7753	pos	42.2	5.08	0.2307	4.643	0.08796
Hexamethylene Bisacetamide	0.005175	0.04686	1.6616	1.6678	1.0903	0.1247	yes	up	B(i)	-	-	-	-	-	-	-	HMDB0041901	Organic acids and derivatives	Carboximidic acids and derivatives	Carboximidic acids	3073-59-4	201.16	3.33472	M+H	C10H20N2O2	35.4	0	metab_8934	pos_8935	pos	45.8	5.158	0.1351	4.731	0.1862
Carteolol	0.001708	0.02353	1.6612	1.6396	1.0849	0.1175	yes	up	B(ii)	C06874	-	-	-	-	-	-	HMDB0014662	Organoheterocyclic compounds	Quinolines and derivatives	Hydroquinolines	51781-06-7	310.211	4.47358	M+NH4	C16H24N2O3	0	57.9	metab_2885	pos_2886	pos	47.7	5.075	0.1155	4.678	0.1264
3-Pyridinamine	0.0001603	0.005932	1.6606	1.6565	1.0704	0.0981	yes	up	B(i)	-	-	-	-	-	-	-	-	-	-	-	-	95.0607	0.944533	M+H	C5H6N2	59.9	0	metab_10315	pos_10316	pos	50.8	5.779	0.06287	5.399	0.09332
8-(2,3-Dihydro-1,4-Benzodioxine-3-Carbonyl)-1,4,8-Oxadiazecan-5-One	0.003972	0.0394	1.6533	1.6032	1.0773	0.1074	yes	up	B(i)	-	-	-	-	-	-	-	-	-	-	-	-	321.144	2.84187	M+H	C16H20N2O5	68.7	0	metab_9339	pos_9340	pos	52	5.505	0.1714	5.11	0.08026
5-[1-(Cyclopropanecarbonyl)Piperidine-4-Carbonyl]-1,5-Diazacycloundecan-2-One	0.0001465	0.005664	1.6451	1.6424	1.0745	0.1037	yes	up	B(i)	-	-	-	-	-	-	-	-	-	-	-	-	350.243	3.48425	M+H	C19H31N3O3	35.7	0	metab_2294	pos_2295	pos	44.5	5.377	0.06958	5.004	0.08142
Indole-3-Acetyl-L-Leucine	1.466e-05	0.00142	1.6421	1.637	1.0738	0.1027	yes	up	B(i)	-	-	-	-	-	-	-	-	-	-	-	-	289.154	5.4104	M+H	C16H20N2O3	73.3	0	metab_3336	pos_3337	pos	52.7	5.238	0.04812	4.878	0.05369
Z-Clausenamide	0.001102	0.01808	1.6367	1.5952	1.0866	0.1199	yes	up	B(ii)	-	-	-	-	-	-	-	HMDB0038621	Benzenoids	Benzene and substituted derivatives	Benzazocines	136173-85-8	279.126	5.35575	M+	C18H17NO2	0	41	metab_3307	pos_3308	pos	44.2	4.641	0.1323	4.271	0.041
Secologanate	0.01308	0.08465	1.6299	1.6366	1.0896	0.1237	yes	up	B(ii)	C01957;_	-	-	map01110;map00902	Biosynthesis of secondary metabolites;Monoterpenoid biosynthesis	Metabolism;Metabolism	Global and overview maps;Metabolism of terpenoids and polyketides	HMDB0304481	Lipids and lipid-like molecules	Prenol lipids	Terpene glycosides	-;_	375.129	4.06483	M+H	C16H22O10	0	57.1	metab_8470	pos_8471	pos	49.5	5.414	0.1977	4.969	0.2055
Taxa-4(20),11-Dien-5Alpha-Ol	0.01718	0.09961	1.6253	1.6253	1.0998	0.1372	yes	up	B(ii)	C11895;_	-	-	map01100;map00904;map01110	Metabolic pathways;Diterpenoid biosynthesis;Biosynthesis of secondary metabolites	Metabolism;Metabolism;Metabolism	Global and overview maps;Metabolism of terpenoids and polyketides;Global and overview maps	HMDB0304494	Lipids and lipid-like molecules	Prenol lipids	Diterpenoids	178888-02-3;_	306.278	6.9844	M+NH4	C20H32O	0	55.7	metab_5121	pos_5122	pos	39.3	4.983	0.1876	4.531	0.2503
(1X,2X)-Guaiacylglycerol 3-Glucoside	0.03537	0.1555	1.625	1.6372	1.1131	0.1545	yes	up	B(ii)	-	-	-	-	-	-	-	HMDB0040600	Lipids and lipid-like molecules	Fatty Acyls	Fatty acyl glycosides	7094-73-7	375.131	4.4885	M-H	C16H24O10	0	49.6	metab_18108	neg_6917	neg	47.3	4.883	0.3289	4.387	0.21
3,7-Dihydroxy-12-Oxocholanoic Acid	0.009514	0.07006	1.6248	1.6033	1.0708	0.0986	yes	up	B(ii)	-	-	-	-	-	-	-	HMDB0000400	Lipids and lipid-like molecules	Steroids and steroid derivatives	Bile acids, alcohols and derivatives	2458-08-04	424.305	7.73992	M+NH4	C24H38O5	0	84.2	metab_5642	pos_5643	pos	55.6	6.326	0.1981	5.908	0.1412
2-(2-Chlorophenyl)-N-[(3,5-Dimethyl-1,2-Oxazol-4-Yl)Methyl]Acetamide	1.149e-05	0.001206	1.6158	1.612	1.0636	0.0889	yes	up	B(i)	-	-	-	-	-	-	-	-	-	-	-	-	279.091	2.71695	M+H	C14H15ClN2O2	68.3	0	metab_9523	pos_9524	pos	46.9	5.805	0.04778	5.458	0.0462
3,3,5,5-Tetramethylpyrroline-N-Oxide	0.000991	0.01688	1.6054	1.6041	1.0644	0.09	yes	up	B(i)	-	-	-	-	-	-	-	-	-	-	-	-	159.149	1.59893	M+NH4	C8H15NO	64	0	metab_10052	pos_10053	pos	51.9	6.165	0.1119	5.792	0.08836
Reproterol	0.0008572	0.0154	1.6048	1.6196	1.0678	0.0946	yes	up	B(ii)	-	-	-	-	-	-	-	HMDB0257155	Organoheterocyclic compounds	Imidazopyrimidines	Purines and purine derivatives	-	372.165	2.45885	M+H-H2O	C18H23N5O5	0	79.4	metab_1475	pos_1476	pos	53	5.956	0.1188	5.578	0.07237
4-Hydroxy-4-(3-Pyridyl)-Butanoic Acid	0.02042	0.1103	1.5982	1.5901	1.0923	0.1273	yes	up	B(ii)	C19579	-	-	map05204;map00980	Chemical carcinogenesis - DNA adducts;Metabolism of xenobiotics by cytochrome P450	Human Diseases;Metabolism	Cancer: overview;Xenobiotics biodegradation and metabolism	HMDB0001119	Organoheterocyclic compounds	Pyridines and derivatives	Not Available	15569-97-8	164.07	4.8015	M+H-H2O	C9H11NO3	0	49.6	metab_8080	pos_8081	pos	48.5	5.185	0.2891	4.747	0.02745
N-Stearoyl Isoleucine	0.01681	0.09844	1.5971	1.632	1.0996	0.1369	yes	up	B(ii)	-	-	-	-	-	-	-	HMDB0241944	Organic acids and derivatives	Carboxylic acids and derivatives	Amino acids, peptides, and analogues	-	396.348	7.01973	M-H	C24H47NO3	0	64.1	metab_15928	neg_4737	neg	49.7	5.003	0.1025	4.55	0.309
N-Methylleucine	0.002584	0.03029	1.5939	1.5784	1.0923	0.1274	yes	up	B(i)	-	-	-	-	-	-	-	-	-	-	-	-	144.102	2.03925	M-H	C7H15NO2	75	0	metab_12173	neg_982	neg	52	4.401	0.1557	4.029	0.04765
3-Oxo-4,6-Choladienoic Acid	0.01064	0.07499	1.5934	1.5693	1.0676	0.0944	yes	up	B(ii)	-	-	-	-	-	-	-	HMDB0000476	Lipids and lipid-like molecules	Steroids and steroid derivatives	Bile acids, alcohols and derivatives	88179-71-9	371.257	7.73992	M+H	C24H34O3	0	50.6	metab_5645	pos_5646	pos	48.6	6.362	0.1989	5.959	0.1343
Cp-642931	0.007448	0.05924	1.5832	1.548	1.0684	0.0954	yes	up	B(i)	-	-	-	-	-	-	-	-	-	-	-	-	344.217	5.20748	M+H	C17H25N7O	76.5	0	metab_7885	pos_7886	pos	51.8	5.97	0.1287	5.588	0.1798
4-Hydroxycinnamoylagmatine	0.04778	0.1873	1.5827	1.6295	1.1345	0.1821	yes	up	B(ii)	C04498	-	-	map01100;map01110;map00999	Metabolic pathways;Biosynthesis of secondary metabolites;Biosynthesis of various plant secondary metabolites	Metabolism;Metabolism;Metabolism	Global and overview maps;Global and overview maps;Biosynthesis of other secondary metabolites	HMDB0033460	Phenylpropanoids and polyketides	Cinnamic acids and derivatives	Hydroxycinnamic acids and derivatives	7295-86-5	275.15	5.78692	M-H	C14H20N4O2	0	59.6	metab_13743	neg_2552	neg	48	4.326	0.2448	3.813	0.3969
2-Aminoheptanedioic Acid	0.0002712	0.007963	1.5822	1.5682	1.0682	0.0951	yes	up	B(i)	-	-	-	-	-	-	-	HMDB0034252	Organic acids and derivatives	Carboxylic acids and derivatives	Amino acids, peptides, and analogues	3721-85-5	176.092	1.0302	M+H	C7H13NO4	69.6	0	metab_10233	pos_10234	pos	52.1	5.391	0.09872	5.047	0.02302
Glycochenodeoxycholate-3-Sulfate	0.01447	0.08981	1.5797	1.5494	1.073	0.1016	yes	up	B(ii)	-	-	-	-	-	-	-	HMDB0002497	Lipids and lipid-like molecules	Steroids and steroid derivatives	Bile acids, alcohols and derivatives	67030-54-0	530.277	7.73992	M+H	C26H43NO8S	0	50.8	metab_5638	pos_5639	pos	46.6	5.924	0.1998	5.521	0.1669
Metalaxyl Acid	0.002794	0.03143	1.5784	1.5295	1.0724	0.1008	yes	up	B(i)	-	-	-	-	-	-	-	-	-	-	-	-	266.138	4.44235	M+H	C14H19NO4	63.2	0	metab_2867	pos_2868	pos	49.9	5.229	0.1128	4.876	0.1224
N-Hydroxymexiletine Glucuronide	0.0004235	0.01048	1.5703	1.5796	1.0637	0.0891	yes	up	B(ii)	-	-	-	-	-	-	-	HMDB0255156	Organic oxygen compounds	Organooxygen compounds	Carbohydrates and carbohydrate conjugates	-	372.165	2.01265	M+H	C17H25NO8	0	42.6	metab_9883	pos_9884	pos	46.4	5.895	0.07216	5.542	0.09771
5,6,7,8-Tetrahydro-2-Quinolone	0.0001759	0.006262	1.5688	1.5391	1.0719	0.1002	yes	up	B(i)	-	-	-	-	-	-	-	-	-	-	-	-	191.118	3.20215	M+ACN+H	C9H11NO	38.4	0	metab_2086	pos_2087	pos	44.8	4.889	0.07625	4.561	0.05483
Anisomycin	0.02126	0.1129	1.5637	1.5233	1.0808	0.1121	yes	up	B(i)	C11281;_	-	-	-	-	-	-	-;HMDB0243530	Benzenoids	Phenol ethers	Anisoles	22862-76-6;_	265.129	2.04382	M+	C14H19NO4	40.6	0	metab_1369	pos_1370	pos	42.9	5.366	0.2491	4.965	0.1134
Estetrol	0.0006578	0.01331	1.5598	1.54	1.0582	0.0817	yes	up	B(ii)	C22548;_	Hormones and transmitters;-	Steroid hormones;-	-	-	-	-	HMDB0304837	Lipids and lipid-like molecules	Steroids and steroid derivatives	Estrane steroids	15183-37-6;_	309.144	2.13805	M+Na-H2O	C18H24O4	0	59	metab_9733	pos_9734	pos	49.2	6.16	0.01351	5.821	0.1321
3-Methyl-Alpha-Pyrrolidinopropiophenone	0.003437	0.03613	1.5548	1.5578	1.0821	0.1138	yes	up	B(i)	-	-	-	-	-	-	-	-	-	-	-	-	235.18	3.90038	M+NH4	C14H19NO	60	0	metab_8557	pos_8558	pos	49.8	4.892	0.1669	4.521	0.02802
Methylone	1.713e-05	0.001575	1.5473	1.5332	1.0591	0.0828	yes	up	B(i)	C20126	-	-	-	-	-	-	HMDB0254656	Organoheterocyclic compounds	Benzodioxoles	Not Available	186028-79-5;_	208.097	2.3339	M+H	C11H13NO3	79.7	0	metab_9684	pos_9685	pos	54	5.663	0.008523	5.347	0.06885
5-Amino-3-(4-Methoxyphenyl)-5-Oxopentanoic Acid	0.001444	0.02114	1.5469	1.5601	1.076	0.1056	yes	up	B(i)	-	-	-	-	-	-	-	-	-	-	-	-	236.092	4.33498	M-H	C12H15NO4	53.3	0	metab_18184	neg_6993	neg	48.2	5.057	0.06834	4.7	0.1397
N-[(2-Methoxypyridin-3-Yl)Methyl]-2-Phenoxyacetamide	3.077e-05	0.002257	1.5439	1.5259	1.0659	0.0921	yes	up	B(i)	-	-	-	-	-	-	-	-	-	-	-	-	273.123	4.47358	M+H	C15H16N2O3	90.1	0	metab_8242	pos_8243	pos	53.7	5.092	0.03473	4.777	0.06426
4-Nitroso-N-Phenylaniline	0.000179	0.006331	1.5376	1.5516	1.0723	0.1007	yes	up	B(i)	-	-	-	-	-	-	-	-	-	-	-	-	199.086	3.72805	M+H	C12H10N2O	87.4	0	metab_2457	pos_2458	pos	54.6	4.954	0.0565	4.62	0.08326
(2S)-2-Amino-6-[(3-Formylpiperidin-1-Yl)Amino]Hexanoic Acid	6.433e-05	0.003529	1.5352	1.5123	1.0664	0.0928	yes	up	B(ii)	-	-	-	-	-	-	-	HMDB0255325	Organic acids and derivatives	Carboxylic acids and derivatives	Amino acids, peptides, and analogues	-	280.165	4.2771	M+Na	C12H23N3O3	0	58.2	metab_8358	pos_8359	pos	47.7	5.009	0.0463	4.697	0.06495
(2R)-6-Methylpiperidine-2-Carboxylic Acid	2.183e-06	0.0004124	1.5341	1.5246	1.0581	0.0814	yes	up	B(i)	-	-	-	-	-	-	-	-	-	-	-	-	144.102	2.01265	M+H	C7H13NO2	81.2	0	metab_9956	pos_9957	pos	55.2	5.593	0.03296	5.286	0.03224
5-Methoxy-Alpha-Ethyltryptamine	0.003176	0.03412	1.5292	1.5162	1.0758	0.1055	yes	up	B(i)	-	-	-	-	-	-	-	-	-	-	-	-	219.149	4.22182	M+H	C13H18N2O	74.6	0	metab_8389	pos_8390	pos	53.5	4.951	0.1549	4.602	0.02522
Deoxycholylalanine	0.01437	0.08943	1.5272	1.486	1.0661	0.0924	yes	up	B(ii)	-	-	-	-	-	-	-	HMDB0242412	Not Available	Not Available	Not Available	-	518.347	6.15703	M+CH3OH+Na	C27H45NO5	0	76.1	metab_7151	pos_7152	pos	52.1	5.98	0.167	5.609	0.1765
Dropropizine	9.981e-05	0.00449	1.5266	1.5126	1.0575	0.0807	yes	up	B(i)	-	-	-	-	-	-	-	HMDB0251622	Organoheterocyclic compounds	Diazinanes	Piperazines	-	237.159	3.17922	M+H	C13H20N2O2	60.7	0	metab_2073	pos_2074	pos	49.8	5.773	0.05353	5.459	0.06641
N(4)-Acetylsulfamethazine	0.0007153	0.01399	1.5239	1.5036	1.0705	0.0983	yes	up	B(i)	-	-	-	-	-	-	-	HMDB0244280	Benzenoids	Benzene and substituted derivatives	Benzenesulfonamides	-	319.085	5.52273	M-H	C14H16N4O3S	54.8	0	metab_17624	neg_6433	neg	46.4	4.919	0.0695	4.595	0.1008
Leukotriene B4-3-Aminopropylamide	0.005608	0.04943	1.5194	1.5069	1.0646	0.0903	yes	up	B(i)	-	-	-	-	-	-	-	-	-	-	-	-	393.31	5.90957	M+H	C23H40N2O3	46.4	0	metab_7514	pos_7515	pos	46	5.853	0.1135	5.498	0.1585
(S)-2-Propylpiperidine	0.001256	0.01947	1.5165	1.5144	1.0705	0.0983	yes	up	B(ii)	C06523	-	-	map01066;map01060	Biosynthesis of alkaloids derived from terpenoid and polyketide;Biosynthesis of plant secondary metabolites	Metabolism;Metabolism	Chemical structure transformation maps;Chemical structure transformation maps	HMDB0030285	Alkaloids and derivatives	Not Available	Not Available	458-88-8	145.17	0.567133	M+NH4	C8H17N	0	45.4	metab_10891	pos_10892	pos	47	5.071	0.1226	4.737	0.03748
N-(1-Deoxy-1-Fructosyl)Leucine	0.0007362	0.0142	1.5121	1.4931	1.0619	0.0867	yes	up	B(ii)	-	-	-	-	-	-	-	HMDB0037840	Organic acids and derivatives	Carboxylic acids and derivatives	Amino acids, peptides, and analogues	34393-18-5	276.144	4.34803	M+H-H2O	C12H23NO7	0	72.2	metab_8328	pos_8329	pos	52.5	5.487	0.09879	5.167	0.0575
1-Hydroxyacorenone	0.0002653	0.007845	1.5034	1.4699	1.0654	0.0914	yes	up	B(ii)	-	-	-	-	-	-	-	HMDB0030917	Organic oxygen compounds	Organooxygen compounds	Carbonyl compounds	185154-98-7	271.134	6.0598	M+Na-2H	C15H22O3	0	41.9	metab_17179	neg_5988	neg	44	4.937	0.08632	4.634	0.02136
Carboxy-Ptio	0.0005922	0.01268	1.5008	1.4853	1.0659	0.092	yes	up	B(ii)	-	-	-	-	-	-	-	HMDB0249652	Benzenoids	Benzene and substituted derivatives	Benzoic acids and derivatives	-	311.159	4.864	M+CH3OH+H	C14H18N2O4	0	44.5	metab_8051	pos_8052	pos	45.4	5.097	0.03838	4.782	0.1128

## Sheet: down_IG_vs_SG
Metabolite	P_value	FDR	VIP_pred_OPLS-DA	VIP_PLS-DA	FC(intervention/Sham)	Log2FC(intervention/Sham)	Significant	Regulate	level	KEGG Compound ID	KEGG Compound First Category	KEGG Compound Second Category	KEGG Pathway ID	KEGG Pathway Description	KEGG Pathway First Category	KEGG Pathway Second Category	Library ID	HMDB Superclass	HMDB Class	HMDB Subclass	CAS ID	M/Z	Retention time	Adducts	Formula	Fragmentation Score	Theoretical Fragmentation Score	Metab ID	ID	Mode	Score	intervention_mean	intervention_SD	sham_mean	sham_SD
6-Chloro-N-(2-Methylphenyl)-2-(4-Methylphenyl)Imidazo[1,2-A]Pyridin-3-Amine	0.0003394	0.0091	5.0111	5.0502	0.3646	-1.4555	yes	down	B(i)	-	-	-	-	-	-	-	-	-	-	-	-	348.13	3.48425	M+H	C21H18ClN3	43.3	0	metab_2293	pos_2294	pos	39.5	2.05	1.086	5.622	0.05061
Salidroside	7.741e-07	0.0002005	4.8864	4.8773	0.4045	-1.3059	yes	down	B(ii)	C06046;_	-	-	map01100;map00350	Metabolic pathways;Tyrosine metabolism	Metabolism;Metabolism	Global and overview maps;Amino acid metabolism	HMDB0257463	Organic oxygen compounds	Organooxygen compounds	Carbohydrates and carbohydrate conjugates	10338-51-9;_	335.088	3.37603	M+Cl	C14H20O7	0	40.8	metab_18669	neg_7478	neg	45.4	2.13	0.3733	5.266	0.06762
Pyributicarb	1.299e-08	2.375e-05	4.8021	4.767	0.4755	-1.0724	yes	down	B(i)	C18422	-	-	-	-	-	-	-	-	-	-	88678-67-5	348.176	0.999067	M+NH4	C18H22N2O2S	76.1	0	metab_10282	pos_10283	pos	49.7	2.693	0.183	5.663	0.08721
Glycyrrhetinic Acid	0.004647	0.04406	4.7064	4.6309	0.2652	-1.9151	yes	down	B(ii)	C02283	-	-	-	-	-	-	HMDB0011628	Lipids and lipid-like molecules	Prenol lipids	Triterpenoids	1449-05-4;471-53-4;471-53-4;	525.353	5.97968	M+CH3OH+Na	C30H46O4	0	52.5	metab_7421	pos_7422	pos	46.4	1.198	1.357	4.518	0.9827
2-Chloro-N-[2-(1-Ethylpyrrolo[2,3-B]Pyridin-3-Yl)Ethyl]-5-Fluorobenzamide	2.11e-08	2.607e-05	4.5424	4.5055	0.4865	-1.0393	yes	down	B(i)	-	-	-	-	-	-	-	-	-	-	-	-	346.114	2.87352	M+H	C18H17ClFN3O	79	0	metab_1810	pos_1811	pos	47.3	2.514	0.1446	5.167	0.1417
1-(3-Chlorophenyl)-3-(4-Hydroxy-1-Methylimidazol-2-Yl)Urea	3.194e-05	0.002312	3.9195	3.8874	0.598	-0.7419	yes	down	B(ii)	-	-	-	-	-	-	-	HMDB0260231	Benzenoids	Benzene and substituted derivatives	N-phenylureas	-	287.034	3.08948	M+Na-2H	C11H11ClN4O2	0	65.3	metab_12425	neg_1234	neg	45	3.034	0.4196	5.074	0.09472
Asparaginylarginine	0.001798	0.02421	3.8574	3.9376	0.5465	-0.8718	yes	down	B(ii)	-	-	-	-	-	-	-	HMDB0028725	Organic acids and derivatives	Carboxylic acids and derivatives	Amino acids, peptides, and analogues	2478-01-05	306.19	5.66008	M+NH4	C10H20N6O4	0	48.5	metab_7670	pos_7671	pos	45.5	2.729	0.9056	4.994	0.1553
Swertiamarin	1.851e-05	0.00167	3.7657	3.7796	0.608	-0.7179	yes	down	B(ii)	C09800;_	-	-	-	-	-	-	HMDB0258644	Organic oxygen compounds	Organooxygen compounds	Carbohydrates and carbohydrate conjugates	17388-39-5;_	419.119	2.03925	M+FA-H	C16H22O10	0	93.9	metab_12251	neg_1060	neg	56.8	2.973	0.04958	4.89	0.4234
4-Androsten-3Beta,17Beta-Diol 17-Sulfate	7.474e-06	0.0009378	3.4569	3.4695	0.668	-0.5821	yes	down	B(ii)	-	-	-	-	-	-	-	HMDB0240429	Lipids and lipid-like molecules	Steroids and steroid derivatives	Sulfated steroids	102287-51-4	415.183	3.4563	M+FA-H	C19H30O5S	0	81.3	metab_12620	neg_1429	neg	50.8	3.219	0.2534	4.819	0.1054
Ser Cys Arg	5.777e-09	1.856e-05	3.3735	3.3639	0.7414	-0.4317	yes	down	B(i)	-	-	-	-	-	-	-	-	-	-	-	-	365.156	3.48425	M+H	C12H24N6O5S	39.2	0	metab_2295	pos_2296	pos	44.2	4.229	0.07438	5.704	0.05327
Imazapyr	2.558e-06	0.0004617	3.3693	3.3552	0.7225	-0.4689	yes	down	B(i)	C18864	-	-	-	-	-	-	HMDB0253405	Organic acids and derivatives	Carboxylic acids and derivatives	Amino acids, peptides, and analogues	81334-34-1;_	260.104	4.05492	M-H	C13H15N3O3	42.4	0	metab_12952	neg_1761	neg	46.8	3.885	0.205	5.377	0.07174
(3S)-N,4-Bis[(4-Fluorophenyl)Methyl]-5-Oxomorpholine-3-Carboxamide	3.023e-06	0.0005146	3.25	3.2365	0.7314	-0.4513	yes	down	B(i)	-	-	-	-	-	-	-	-	-	-	-	-	361.139	2.00452	M+H	C19H18F2N2O3	55.1	0	metab_9961	pos_9962	pos	46.6	3.779	0.1314	5.167	0.1806
3-Hydroxybutyrylcarnitine	3.379e-05	0.002401	3.1302	3.1279	0.7135	-0.4871	yes	down	B(ii)	-	-	-	-	-	-	-	HMDB0013127	Lipids and lipid-like molecules	Fatty Acyls	Fatty acid esters	1469900-92-2;	282.109	5.47418	M+Cl	C11H21NO5	0	59	metab_13612	neg_2421	neg	47.3	3.294	0.177	4.617	0.25
Goshonoside F6	0.002687	0.03085	3.1297	3.0672	0.7343	-0.4455	yes	down	B(ii)	-	-	-	-	-	-	-	HMDB0038542	Lipids and lipid-like molecules	Prenol lipids	Terpene glycosides	138614-60-5	621.327	5.82385	M+Na-H2O	C31H52O12	0	57.7	metab_7583	pos_7584	pos	47.8	3.906	0.6068	5.319	0.1095
Molinate	1.257e-05	0.001288	3.1019	3.1013	0.7469	-0.421	yes	down	B(ii)	C11086;_	-	-	-	-	-	-	HMDB0254835	Organic nitrogen compounds	Organonitrogen compounds	Amines	2212-67-1;_	359.124	2.00732	M+FA-H	C13H14N8O2	0	48.5	metab_19106	neg_7915	neg	47.2	3.792	0.2034	5.077	0.1332
Phaseic Acid	1.249e-06	0.0002892	3.0725	3.0502	0.7313	-0.4514	yes	down	B(ii)	C09707;_	-	-	map00906	Carotenoid biosynthesis	Metabolism	Metabolism of terpenoids and polyketides	HMDB0302844	Lipids and lipid-like molecules	Prenol lipids	Sesquiterpenoids	24394-14-7;_	301.108	5.75493	M+Na-2H	C15H20O5	0	46.3	metab_13727	neg_2536	neg	45.6	3.34	0.04961	4.567	0.1739
(2S,3S,4R,5R)-5-(6-Aminopurin-9-Yl)-N-Cyclopropyl-3,4-Dihydroxyoxolane-2-Carboxamide	1.115e-05	0.001202	3.0256	2.9783	0.7907	-0.3388	yes	down	B(ii)	-	-	-	-	-	-	-	HMDB0242669	Nucleosides, nucleotides, and analogues	Purine nucleosides	Not Available	-	321.129	0.6897	M+H	C13H16N6O4	0	59.2	metab_10568	pos_10569	pos	47.7	4.488	0.1981	5.676	0.08811
(5Xi,9Xi)-17-Hydroxykaur-15-En-19-Oic Acid	0.002063	0.02621	2.9401	2.8605	0.7665	-0.3837	yes	down	B(i)	-	-	-	-	-	-	-	-	-	-	-	-	363.218	6.05185	M+FA-H	C20H30O3	51.2	0	metab_14055	neg_2864	neg	47.8	4.001	0.4697	5.22	0.2148
Annomuricatin A	0.004594	0.04379	2.9073	2.8535	0.7847	-0.3498	yes	down	B(ii)	-	-	-	-	-	-	-	HMDB0303181	Organic acids and derivatives	Carboxylic acids and derivatives	Amino acids, peptides, and analogues	-	591.317	6.52117	M+CH3OH+H	C27H38N6O7	0	75	metab_4632	pos_4633	pos	52.1	4.581	0.5857	5.838	0.1759
(R)-8-Acetoxycarvotanacetone	7.577e-05	0.003833	2.8701	2.8398	0.7822	-0.3544	yes	down	B(ii)	-	-	-	-	-	-	-	HMDB0037104	Lipids and lipid-like molecules	Prenol lipids	Monoterpenoids	56691-69-1	255.123	4.07045	M+FA-H	C12H18O3	0	46	metab_18295	neg_7104	neg	47.6	3.958	0.2425	5.06	0.1206
(2-Ethoxy-2-Oxoethyl) 2-(3-Fluorophenyl)-1-Oxoisoquinoline-4-Carboxylate	0.002768	0.0313	2.8507	2.8718	0.7569	-0.4017	yes	down	B(i)	-	-	-	-	-	-	-	-	-	-	-	-	370.112	3.48425	M+H	C20H16FNO5	73.2	0	metab_8832	pos_8833	pos	49.8	3.871	0.5422	5.114	0.04586
7-[(1R,2R,5S)-5-Hydroxy-2-[(1E,3S)-3-Hydroxyoct-1-En-1-Yl]-3-Oxocyclopentyl]Heptanoylcarnitine	0.003134	0.03385	2.8227	2.8438	0.7604	-0.3952	yes	down	B(ii)	-	-	-	-	-	-	-	HMDB0241888	Lipids and lipid-like molecules	Fatty Acyls	Eicosanoids	-	530.368	5.98747	M+CH3OH+H	C27H47NO7	0	55.4	metab_7405	pos_7406	pos	48.9	3.871	0.1462	5.091	0.6073
Seryllysine	1.245e-07	7.405e-05	2.781	2.7639	0.8394	-0.2526	yes	down	B(ii)	-	-	-	-	-	-	-	HMDB0029044	Organic acids and derivatives	Carboxylic acids and derivatives	Amino acids, peptides, and analogues	22677-61-8	256.129	1.2326	M+Na	C9H19N3O4	0	61.4	metab_1002	pos_1003	pos	49.6	5.231	0.04613	6.232	0.09248
P-Cresol	0.001991	0.02555	2.7795	2.7924	0.7507	-0.4137	yes	down	B(ii)	C01468	-	-	map01100;map01220;map00633;map01120;map00623;map04974	Metabolic pathways;Degradation of aromatic compounds;Nitrotoluene degradation;Microbial metabolism in diverse environments;Toluene degradation;Protein digestion and absorption	Metabolism;Metabolism;Metabolism;Metabolism;Metabolism;Organismal Systems	Global and overview maps;Global and overview maps;Xenobiotics biodegradation and metabolism;Global and overview maps;Xenobiotics biodegradation and metabolism;Digestive system	HMDB0001858	Benzenoids	Phenols	Cresols	106-44-5	153.055	5.93157	M+FA-H	C7H8O	0	24.9	metab_17391	neg_6200	neg	41.7	3.481	0.4046	4.637	0.2897
Prostaglandin A1	3.716e-05	0.002504	2.6628	2.6336	0.8288	-0.2709	yes	down	B(i)	C04685	Lipids	Eicosanoids	-	-	-	-	HMDB0002656	Lipids and lipid-like molecules	Fatty Acyls	Eicosanoids	14152-28-4	381.228	5.40267	M+FA-H	C20H32O4	35.5	0	metab_17711	neg_6520	neg	45.3	4.551	0.1946	5.491	0.06078
4-Amino-5-Methylamino-2',7'-Difluorescein	0.001963	0.02534	2.661	2.6666	0.8056	-0.3119	yes	down	B(ii)	-	-	-	-	-	-	-	HMDB0250828	Organoheterocyclic compounds	Benzopyrans	1-benzopyrans	-	413.097	3.72028	M+H	C21H14F2N2O5	0	41.6	metab_8671	pos_8672	pos	45	4.372	0.4313	5.427	0.04943
Gamma-Glutamylhydroxyproline	4.106e-05	0.002638	2.6537	2.6458	0.8285	-0.2715	yes	down	B(ii)	-	-	-	-	-	-	-	HMDB0029150	Organic acids and derivatives	Carboxylic acids and derivatives	Amino acids, peptides, and analogues	1801529-32-7	319.114	0.7038	M+Hac-H	C10H16N2O6	0	71.6	metab_19501	neg_8310	neg	52.5	4.564	0.1856	5.509	0.1024
17-Dimethylaminogeldanamycin	0.004079	0.04017	2.6229	2.5603	0.8372	-0.2563	yes	down	B(ii)	-	-	-	-	-	-	-	HMDB0244766	Phenylpropanoids and polyketides	Macrolactams	Not Available	-	621.327	5.66008	M+Na-H2O	C32H48N4O8	0	93.2	metab_3459	pos_3460	pos	56.4	5.18	0.4629	6.187	0.1151
Propyl 1-(Propylthio)Propyl Disulfide	0.01378	0.08704	2.5962	2.4908	0.8457	-0.2418	yes	down	B(ii)	-	-	-	-	-	-	-	HMDB0033040	Organosulfur compounds	Organic disulfides	Dialkyldisulfides	126876-27-5	245.049	6.76348	M+Na-2H	C9H20S3	0	65.4	metab_15031	neg_3840	neg	49.5	5.677	0.5689	6.713	0.3014
Queuine	0.02065	0.111	2.5077	2.4624	0.7784	-0.3614	yes	down	B(ii)	C01449	-	-	-	-	-	-	HMDB0001495	Organoheterocyclic compounds	Pyrrolopyrimidines	Pyrrolo[2,3-d]pyrimidines	72496-59-4	276.109	4.71882	M-H	C12H15N5O3	0	47.9	metab_18013	neg_6822	neg	45.8	3.709	0.6794	4.765	0.1953
Proscillaridin	0.00247	0.02939	2.5066	2.4575	0.8449	-0.2432	yes	down	B(ii)	C12816;_	Steroids;-	24-Carbon atoms;-	-	-	-	-	HMDB0256851	Lipids and lipid-like molecules	Steroids and steroid derivatives	Steroid lactones	466-06-8;_	589.303	5.86693	M+Hac-H	C30H42O8	0	70.6	metab_17457	neg_6266	neg	52	4.934	0.3649	5.84	0.1523
2-Hydroxy-4-(Methylthio)Butyric Acid	7.928e-06	0.0009646	2.4786	2.4769	0.8631	-0.2124	yes	down	B(i)	-	-	-	-	-	-	-	HMDB0037115	Lipids and lipid-like molecules	Fatty Acyls	Fatty acids and conjugates	120-91-2	149.027	3.65382	M-H	C5H10O3S	39.7	0	metab_12719	neg_1528	neg	45.3	5.138	0.1295	5.953	0.0565
Glycylprolylhydroxyproline	7.119e-05	0.003697	2.4747	2.4681	0.8384	-0.2542	yes	down	B(ii)	-	-	-	-	-	-	-	HMDB0002171	Organic acids and derivatives	Carboxylic acids and derivatives	Amino acids, peptides, and analogues	2239-67-0	344.146	4.00637	M+Hac-H	C12H19N3O5	0	54.5	metab_12911	neg_1720	neg	48.2	4.302	0.1654	5.131	0.1227
Sakuranetin	0.01311	0.08471	2.4649	2.4036	0.7862	-0.347	yes	down	B(ii)	C09833	-	-	map00941;map01110	Flavonoid biosynthesis;Biosynthesis of secondary metabolites	Metabolism;Metabolism	Biosynthesis of other secondary metabolites;Global and overview maps	HMDB0030090	Phenylpropanoids and polyketides	Flavonoids	O-methylated flavonoids	2957-21-3;	304.117	5.6523	M+NH4	C16H14O5	0	65.1	metab_7675	pos_7676	pos	49.1	3.519	0.4973	4.476	0.3255
Leucinic Acid	0.001745	0.02378	2.4307	2.4858	0.7895	-0.3409	yes	down	B(i)	-	-	-	-	-	-	-	HMDB0000665;LMFA01050381	Lipids and lipid-like molecules	Fatty Acyls	Fatty acids and conjugates	498-36-2;	177.076	5.18855	M+FA-H	C6H12O3	84.6	0	metab_13462	neg_2271	neg	54.1	3.425	0.2967	4.338	0.2499
N-(3-Hydroxypropyl)Valine	4.132e-07	0.0001327	2.4291	2.4216	0.8625	-0.2134	yes	down	B(ii)	-	-	-	-	-	-	-	HMDB0255001	Organic acids and derivatives	Carboxylic acids and derivatives	Amino acids, peptides, and analogues	-	176.128	1.67692	M+H	C8H17NO3	0	47.2	metab_10030	pos_10031	pos	48	4.831	0.07593	5.601	0.04339
Ganosporeric Acid A	0.006128	0.0526	2.4097	2.4652	0.7907	-0.3388	yes	down	B(ii)	C16526;_	Lipids;-	Fatty acids;-	map01040	Biosynthesis of unsaturated fatty acids	Metabolism	Lipid metabolism	HMDB0033022	Lipids and lipid-like molecules	Fatty Acyls	Fatty acids and conjugates	135357-25-4;	491.238	4.2062	M+H-2H2O	C30H38O8	0	46.5	metab_8396	pos_8397	pos	45.7	3.6	0.4716	4.553	0.1338
Myricanene B 5-[Arabinosyl-(1->6)-Glucoside]	0.01172	0.07937	2.3728	2.3581	0.8146	-0.2959	yes	down	B(ii)	-	-	-	-	-	-	-	HMDB0039348	Phenylpropanoids and polyketides	Diarylheptanoids	Cyclic diarylheptanoids	-	667.296	5.13723	M+CH3OH+H	C32H42O13	0	64.5	metab_3207	pos_3208	pos	49.8	4.002	0.4542	4.913	0.3187
Pentanoic Acid, 5-(Dipentylamino)-5-Oxo-4-((3-Quinolinylcarbonyl)Amino)-, (R)-	0.02048	0.1104	2.3726	2.4535	0.7995	-0.3228	yes	down	B(ii)	-	-	-	-	-	-	-	HMDB0247713	Organic acids and derivatives	Carboxylic acids and derivatives	Amino acids, peptides, and analogues	-	442.269	4.49698	M+H	C25H35N3O4	0	40.7	metab_8228	pos_8229	pos	46.5	4.179	0.2123	5.227	0.762
Mevalonic Acid	5.01e-07	0.000149	2.3675	2.3648	0.8778	-0.188	yes	down	B(i)	C00418	-	-	map01100;map01110;map04216;map00900;map01070;map01062;map01060	Metabolic pathways;Biosynthesis of secondary metabolites;Ferroptosis;Terpenoid backbone biosynthesis;Biosynthesis of plant hormones;Biosynthesis of terpenoids and steroids;Biosynthesis of plant secondary metabolites	Metabolism;Metabolism;Cellular Processes;Metabolism;Metabolism;Metabolism;Metabolism	Global and overview maps;Global and overview maps;Cell growth and death;Metabolism of terpenoids and polyketides;Chemical structure transformation maps;Chemical structure transformation maps;Chemical structure transformation maps	HMDB0000227;LMFA01050352;PW_C000152	Lipids and lipid-like molecules	Fatty Acyls	Fatty acids and conjugates	17817-88-8;;150-97-0	147.065	2.2655	M-H	C6H12O4	58	0	metab_18902	neg_7711	neg	49.7	5.288	0.02212	6.024	0.09261
3-Ethoxypropanoic Acid	0.000327	0.008914	2.3582	2.3841	0.8704	-0.2003	yes	down	B(i)	-	-	-	-	-	-	-	-	-	-	-	-	117.055	3.70848	M-H	C5H10O3	94.3	0	metab_18510	neg_7319	neg	56.6	5.365	0.1995	6.164	0.1571
Pyocyanin	0.005678	0.0498	2.3459	2.2707	0.8706	-0.2	yes	down	B(ii)	C01748;_	-	-	map01100;map01110;map00405	Metabolic pathways;Biosynthesis of secondary metabolites;Phenazine biosynthesis	Metabolism;Metabolism;Metabolism	Global and overview maps;Global and overview maps;Biosynthesis of other secondary metabolites	HMDB0256934	Organoheterocyclic compounds	Diazanaphthalenes	Benzodiazines	85-66-5;_	245.049	6.53182	M+Cl	C13H10N2O	0	49.7	metab_14744	neg_3553	neg	48.4	5.434	0.3344	6.242	0.2647
Lys Glu Phe	4.714e-06	0.0006945	2.3338	2.3075	0.8689	-0.2027	yes	down	B(i)	-	-	-	-	-	-	-	-	-	-	-	-	440.253	3.79108	M+NH4	C20H30N4O6	63.9	0	metab_2508	pos_2509	pos	50.5	4.694	0.07045	5.402	0.09944
Tomaymycin-(Dh)2-Ppl Hemiaminal	0.002336	0.02842	2.2873	2.2262	0.8606	-0.2165	yes	down	B(i)	-	-	-	-	-	-	-	-	-	-	-	-	335.159	5.89395	M+CH3OH+H	C16H18N2O4	42.6	0	metab_7536	pos_7537	pos	45.4	4.582	0.287	5.324	0.149
Urobilin	0.001837	0.02444	2.2792	2.2366	0.9051	-0.1438	yes	down	B(i)	C05794	-	-	map00860	Porphyrin metabolism	Metabolism	Metabolism of cofactors and vitamins	HMDB0004160	Organoheterocyclic compounds	Tetrapyrroles and derivatives	Bilirubins	1856-98-0	591.317	5.72248	M+H	C33H42N4O6	72.1	0	metab_3480	pos_3481	pos	52.6	7.069	0.2859	7.81	0.1071
2-Hydroxy-3-Methylpentanoic Acid	0.0005077	0.01162	2.2329	2.272	0.8873	-0.1725	yes	down	B(i)	-	-	-	-	-	-	-	HMDB0000317	Lipids and lipid-like molecules	Fatty Acyls	Fatty acids and conjugates	488-15-3	131.07	5.18855	M-H	C6H12O3	79.7	0	metab_17793	neg_6602	neg	54	5.771	0.19	6.504	0.1657
2-Oxoarginine	0.005611	0.04943	2.2325	2.2302	0.8349	-0.2604	yes	down	B(ii)	C03771	-	-	map01100;map00470;map00330	Metabolic pathways;D-Amino acid metabolism;Arginine and proline metabolism	Metabolism;Metabolism;Metabolism	Global and overview maps;Metabolism of other amino acids;Amino acid metabolism	HMDB0004225	Organic acids and derivatives	Keto acids and derivatives	Short-chain keto acids and derivatives	3715/10/4;3715-10-4	154.061	4.38117	M-H2O-H	C6H11N3O3	0	42.6	metab_13099	neg_1908	neg	46.1	3.903	0.1774	4.675	0.3965
(R)-1-Methylpiperidine-2-Carboxylic Acid	1.992e-07	9.141e-05	2.1795	2.1705	0.8789	-0.1862	yes	down	B(ii)	-	-	-	-	-	-	-	HMDB0242107	Organic acids and derivatives	Carboxylic acids and derivatives	Amino acids, peptides, and analogues	-	176.128	2.01265	M+CH3OH+H	C7H13NO2	0	41.1	metab_9951	pos_9952	pos	46.4	4.487	0.04337	5.105	0.04968
Armillarin	0.01309	0.08465	2.1413	2.0802	0.8581	-0.2208	yes	down	B(ii)	-	-	-	-	-	-	-	HMDB0039380	Organic oxygen compounds	Organooxygen compounds	Carbohydrates and carbohydrate conjugates	83329-14-0	473.221	7.48622	M+Hac-H	C24H30O6	0	72.4	metab_15449	neg_4258	neg	49.3	4.359	0.3955	5.08	0.1975
2-(2,5-Dioxopyrrolidin-1-Yl)-N-(2-Hydroxy-2-Methyl-4-Phenylbutyl)Acetamide	1.203e-06	0.0002855	2.1305	2.1117	0.8988	-0.154	yes	down	B(i)	-	-	-	-	-	-	-	-	-	-	-	-	319.165	4.91083	M+H	C17H22N2O4	54	0	metab_3099	pos_3100	pos	49.1	5.229	0.07298	5.818	0.02302
Starch Acetate	4.297e-06	0.000645	2.1249	2.0952	0.8875	-0.1723	yes	down	B(ii)	-	-	-	-	-	-	-	HMDB0029891	Organic acids and derivatives	Carboxylic acids and derivatives	Tricarboxylic acids and derivatives	-	307.102	2.0906	M+H	C12H18O9	0	70.1	metab_9747	pos_9748	pos	51.6	4.605	0.07863	5.189	0.05171
[5-[2-[4-(4-Benzhydrylpiperazin-1-Ium-1-Yl)Phenyl]Ethoxycarbonyl]-2,6-Dimethyl-4-(3-Nitrophenyl)-4H-Pyridin-3-Ylidene]-Methoxymethanolate	0.00325	0.03459	2.1157	2.0651	0.8924	-0.1642	yes	down	B(ii)	-	-	-	-	-	-	-	HMDB0248035	Benzenoids	Benzene and substituted derivatives	Diphenylmethanes	-	651.301	5.51183	M+H-2H2O	C41H42N4O6	0	45.8	metab_7733	pos_7734	pos	44.5	5.368	0.2228	6.015	0.2171
3''-Deamino-3''-Oxonicotianamine	3.264e-06	0.000528	2.0689	2.0433	0.895	-0.1601	yes	down	B(ii)	C15486;_	-	-	map01100;map01110;map00999	Metabolic pathways;Biosynthesis of secondary metabolites;Biosynthesis of various plant secondary metabolites	Metabolism;Metabolism;Metabolism	Global and overview maps;Global and overview maps;Biosynthesis of other secondary metabolites	HMDB0304096	Organic acids and derivatives	Carboxylic acids and derivatives	Amino acids, peptides, and analogues	-;_	284.103	4.01802	M+H-H2O	C12H17N2O7-	0	52.7	metab_8492	pos_8493	pos	47.1	4.72	0.08135	5.274	0.01591
Hexahydro-4-Methylphthalic Anhydride	0.004043	0.03996	2.0652	2.0895	0.87	-0.2009	yes	down	B(ii)	-	-	-	-	-	-	-	HMDB0244846	Organoheterocyclic compounds	Isobenzofurans	Not Available	-	167.071	6.0598	M-H	C9H12O3	0	42.8	metab_17184	neg_5993	neg	46.5	4.478	0.2764	5.147	0.1724
Acetoxy-8-Gingerol	0.000103	0.004558	2.0635	2.0468	0.8946	-0.1607	yes	down	B(i)	-	-	-	-	-	-	-	-	-	-	-	-	363.218	6.16403	M-H	C21H32O5	60.5	0	metab_17022	neg_5831	neg	48.5	4.88	0.1421	5.455	0.03037
Procaine	0.009932	0.07192	2.0545	2.0976	0.8886	-0.1704	yes	down	B(ii)	C07375	-	-	-	-	-	-	HMDB0014859	Benzenoids	Benzene and substituted derivatives	Benzoic acids and derivatives	59-46-1	237.159	2.88913	M+H	C13H20N2O2	0	57.6	metab_1816	pos_1817	pos	50.6	5.727	0.2128	6.445	0.3964
3-(2,4-Dimethyl-5-(2-Oxo-1,2-Dihydroindol-3-Ylidenemethyl)-1H-Pyrrol-3-Yl)Propionic Acid	0.006162	0.05266	2.0506	2.0048	0.8829	-0.1796	yes	down	B(ii)	-	-	-	-	-	-	-	HMDB0258528	Organoheterocyclic compounds	Indoles and derivatives	Indolines	-	343.164	5.7147	M+CH3OH+H	C18H18N2O3	0	65.2	metab_7651	pos_7652	pos	48.2	4.766	0.3058	5.398	0.1185
Pki-402	0.0002025	0.006806	2.0126	2.0211	0.8967	-0.1573	yes	down	B(i)	-	-	-	-	-	-	-	-	-	-	-	-	571.29	4.37147	M+H	C29H34N10O3	36.7	0	metab_2817	pos_2818	pos	44.4	4.93	0.1493	5.498	0.0622
(3S,5R,6R,7E)-3,5,6-Trihydroxy-7-Megastigmen-9-One	0.0008498	0.01537	2.0105	1.9929	0.9017	-0.1493	yes	down	B(ii)	-	-	-	-	-	-	-	HMDB0038736	Lipids and lipid-like molecules	Prenol lipids	Sesquiterpenoids	-	287.15	5.89093	M+FA-H	C13H22O4	0	60.8	metab_17444	neg_6253	neg	50.6	5.219	0.125	5.788	0.1832
Jasmolone	0.0001281	0.005243	2.0075	2.0012	0.9089	-0.1378	yes	down	B(ii)	-	-	-	-	-	-	-	HMDB0030039	Organic oxygen compounds	Organooxygen compounds	Alcohols and polyols	54383-66-3	239.128	5.83492	M+Hac-H	C11H16O2	0	52.4	metab_13768	neg_2577	neg	49.6	5.486	0.09112	6.036	0.1277
Triacetic Acid	6.735e-05	0.003593	1.9833	1.9569	0.9007	-0.1508	yes	down	B(ii)	C01757	-	-	-	-	-	-	HMDB0259137	Organic acids and derivatives	Keto acids and derivatives	Medium-chain keto acids and derivatives	-	289.091	2.38073	2M+H	C6H8O4	0	45.8	metab_9672	pos_9673	pos	48.2	4.737	0.1183	5.259	0.03821
(R)-Laudanidine	0.02232	0.1167	1.9771	2.0372	0.8853	-0.1758	yes	down	B(ii)	C17592	-	-	map00950;map01110	Isoquinoline alkaloid biosynthesis;Biosynthesis of secondary metabolites	Metabolism;Metabolism	Biosynthesis of other secondary metabolites;Global and overview maps	HMDB0030211	Organoheterocyclic compounds	Isoquinolines and derivatives	Benzylisoquinolines	301-21-3	385.214	5.76147	M+ACN+H	C20H25NO4	0	47.7	metab_7627	pos_7628	pos	47	5.624	0.07354	6.353	0.5619
Quinoline-4,8-Diol	0.0005232	0.01183	1.956	1.9551	0.9315	-0.1024	yes	down	B(ii)	C05637	-	-	map00380	Tryptophan metabolism	Metabolism	Amino acid metabolism	HMDB0060289	Organoheterocyclic compounds	Quinolines and derivatives	Quinolones and derivatives	-;_	206.045	4.27245	M+FA-H	C9H7NO2	0	68	metab_13055	neg_1864	neg	52.5	7.384	0.1749	7.927	0.03319
2-Hydroxy-Desipramine Glucuronide	0.001987	0.02553	1.9542	1.9616	0.8802	-0.1841	yes	down	B(ii)	-	-	-	-	-	-	-	HMDB0060716	Organoheterocyclic compounds	Benzazepines	Dibenzazepines	-	459.211	4.61408	M+H	C24H30N2O7	0	50	metab_8172	pos_8173	pos	47.3	4.209	0.2174	4.782	0.1048
Cis-3-Hexenyl 2-Aminobenzoate	0.0117	0.07935	1.9516	1.9964	0.8744	-0.1936	yes	down	B(ii)	-	-	-	-	-	-	-	HMDB0037694	Benzenoids	Benzene and substituted derivatives	Benzoic acids and derivatives	65405-76-7	220.133	2.88913	M+H	C13H17NO2	0	40.4	metab_1815	pos_1816	pos	46.1	4.588	0.1975	5.247	0.3802
Gly Pro Gln	6.841e-05	0.003638	1.9378	1.9021	0.9128	-0.1316	yes	down	B(i)	-	-	-	-	-	-	-	-	-	-	-	-	333.179	6.03417	M+CH3OH+H	C12H20N4O5	39.4	0	metab_7330	pos_7331	pos	44.2	5.181	0.1038	5.676	0.06095
4-Acetamidosalicylic Acid	0.0005577	0.01227	1.9357	1.9481	0.9012	-0.1501	yes	down	B(ii)	-	-	-	-	-	-	-	HMDB0246329	Benzenoids	Benzene and substituted derivatives	Benzoic acids and derivatives	-	176.035	4.6476	M-H2O-H	C9H9NO4	0	45.7	metab_18049	neg_6858	neg	46.1	4.924	0.1613	5.464	0.08802
2,5-Difluoro-N-(3-Methyl-[1,2,4]Triazolo[4,3-A]Pyridin-8-Yl)Benzamide	1.284e-05	0.001289	1.9274	1.9031	0.9078	-0.1395	yes	down	B(i)	-	-	-	-	-	-	-	-	-	-	-	-	289.091	2.0906	M+H	C14H10F2N4O	48.4	0	metab_1381	pos_1382	pos	45.4	4.776	0.08413	5.261	0.03223
Ser Pro Thr	9.536e-06	0.001102	1.9268	1.9228	0.9134	-0.1307	yes	down	B(i)	-	-	-	-	-	-	-	-	-	-	-	-	304.149	0.705033	M+H	C12H21N3O6	78.4	0	metab_10534	pos_10535	pos	52.2	5.2	0.08569	5.693	0.008933
Senkyunolide N	9.757e-05	0.004477	1.922	1.926	0.91	-0.136	yes	down	B(ii)	-	-	-	-	-	-	-	HMDB0302272	Organoheterocyclic compounds	Isobenzofurans	Not Available	-	271.119	4.05492	M+FA-H	C12H18O4	0	40.6	metab_12953	neg_1762	neg	47.3	5.137	0.06579	5.645	0.1248
2-Hydroxyquinoline-3-Carboxylic Acid	0.0009072	0.01587	1.922	1.9141	0.9068	-0.1412	yes	down	B(ii)	-	-	-	-	-	-	-	HMDB0245167	Organoheterocyclic compounds	Quinolines and derivatives	Quinoline carboxylic acids	-	190.05	3.72028	M+H	C10H7NO3	0	58	metab_2451	pos_2452	pos	50.7	5.145	0.1877	5.674	0.03193
Afzelechin 7-Apioside	0.04833	0.1888	1.918	1.9006	0.8633	-0.2121	yes	down	B(ii)	-	-	-	-	-	-	-	HMDB0030824	Phenylpropanoids and polyketides	Flavonoids	Flavans	114590-44-2	461.143	4.6063	M+CH3OH+Na	C20H22O9	0	57.8	metab_8178	pos_8179	pos	49.1	4.427	0.5608	5.128	0.1687
Cadabicine	0.009919	0.07192	1.9136	1.865	0.8994	-0.153	yes	down	B(ii)	-	-	-	-	-	-	-	HMDB0033451	Organic oxygen compounds	Organooxygen compounds	Ethers	99964-83-7	468.248	5.37917	M+CH3OH+H	C25H29N3O4	0	58.4	metab_3319	pos_3320	pos	49	5.076	0.3167	5.644	0.04545
Indole-2-Carboxylic Acid	0.0006623	0.01335	1.9112	1.9032	0.922	-0.1171	yes	down	B(i)	-	-	-	-	-	-	-	HMDB0002285	Organoheterocyclic compounds	Indoles and derivatives	Indolecarboxylic acids and derivatives	1477-50-5	162.055	3.72028	M+H	C9H7NO2	56.8	0	metab_8677	pos_8678	pos	49	6.126	0.1735	6.644	0.03478
2,3-Dihydro-5-(5-Methyl-2-Furanyl)-1H-Pyrrolizine	0.0004059	0.01015	1.9019	1.8788	0.9012	-0.1502	yes	down	B(ii)	-	-	-	-	-	-	-	HMDB0040012	Organoheterocyclic compounds	Pyrrolizines	Not Available	-	188.107	3.23278	M+H	C12H13NO	0	41.6	metab_2114	pos_2115	pos	46.3	4.54	0.07573	5.038	0.1574
Methyl Acetoacetate	0.02388	0.1213	1.8972	1.8092	0.8555	-0.2251	yes	down	B(i)	-	-	-	-	-	-	-	HMDB0000310	Organic acids and derivatives	Keto acids and derivatives	Beta-keto acids and derivatives	105-45-3	117.055	3.65723	M+H	C5H8O3	43.2	0	metab_2407	pos_2408	pos	47.3	3.429	0.3478	4.008	0.2224
2-Amino-3-Methylbenzoate	0.008132	0.06264	1.8936	1.8343	0.8879	-0.1716	yes	down	B(ii)	C16571	-	-	map00982	Drug metabolism - cytochrome P450	Metabolism	Xenobiotics biodegradation and metabolism	HMDB0060680	Benzenoids	Benzene and substituted derivatives	Benzoic acids and derivatives	4389-45-1;_	303.133	5.6523	2M+H	C8H9NO2	0	41	metab_3450	pos_3451	pos	47.5	4.275	0.1678	4.815	0.2751
Eucarvone	0.006981	0.05677	1.8913	1.9182	0.8794	-0.1854	yes	down	B(ii)	C16955	-	-	-	-	-	-	HMDB0302916	Lipids and lipid-like molecules	Prenol lipids	Monoterpenoids	503-93-5;_	195.102	6.23588	M+FA-H	C10H14O	0	53.2	metab_16889	neg_5698	neg	48.1	4.265	0.2446	4.85	0.2114
5(S)-Hpete	2.405e-05	0.001912	1.8907	1.8748	0.9162	-0.1263	yes	down	B(i)	C05356	Lipids	Eicosanoids	map00590;map01100;map04913;map07034;map04726	Arachidonic acid metabolism;Metabolic pathways;Ovarian steroidogenesis;Eicosanoids;Serotonergic synapse	Metabolism;Metabolism;Organismal Systems;Drug Development;Organismal Systems	Lipid metabolism;Global and overview maps;Endocrine system;Structure-based classification;Nervous system	HMDB0001193	Lipids and lipid-like molecules	Fatty Acyls	Eicosanoids	-	381.228	5.97957	M+FA-H	C20H32O4	37.4	0	metab_17329	neg_6138	neg	45.1	5.179	0.08944	5.653	0.03748
(2-Oxo-2,3-Dihydro-1H-Indol-3-Yl)Acetic Acid	0.0002903	0.008236	1.8595	1.8526	0.9233	-0.1152	yes	down	B(i)	-	-	-	-	-	-	-	-	-	-	-	-	190.05	4.9017	M-H	C10H9NO3	96.1	0	metab_17941	neg_6750	neg	58	5.775	0.1361	6.255	0.04858
Rigin	0.001732	0.02374	1.849	1.8312	0.9134	-0.1307	yes	down	B(ii)	-	-	-	-	-	-	-	HMDB0005771	Organic acids and derivatives	Carboxylic acids and derivatives	Amino acids, peptides, and analogues	77727-17-4	461.227	4.6453	M+Na-H2O	C18H32N8O6	0	70.2	metab_8153	pos_8154	pos	51.8	5.219	0.181	5.714	0.09509
3-(2-Fluorophenoxy)-7-Methoxy-2-Methylchromen-4-One	0.02402	0.1218	1.8449	1.7618	0.8984	-0.1546	yes	down	B(i)	-	-	-	-	-	-	-	-	-	-	-	-	301.089	3.64943	M+H	C17H13FO4	69.8	0	metab_2404	pos_2405	pos	50.4	4.862	0.316	5.412	0.2385
Dopaminechrome	0.0008436	0.01529	1.8411	1.8422	0.8891	-0.1696	yes	down	B(ii)	-	-	-	-	-	-	-	HMDB0248311	Organoheterocyclic compounds	Indoles and derivatives	Indolines	-	194.045	4.69468	M+FA-H	C8H7NO2	0	41.4	metab_18029	neg_6838	neg	45.4	3.921	0.1621	4.41	0.07046
5-Methoxy Amt	0.0003356	0.009074	1.8407	1.8086	0.9069	-0.1411	yes	down	B(i)	-	-	-	-	-	-	-	-	-	-	-	-	205.133	3.24057	M+H	C12H16N2O	64.3	0	metab_9005	pos_9006	pos	49.8	4.469	0.03204	4.928	0.1568
3-Hydroxykynurenic Acid	0.03777	0.1623	1.836	1.8859	0.8682	-0.2039	yes	down	B(ii)	-	-	-	-	-	-	-	HMDB0246172	Organoheterocyclic compounds	Quinolines and derivatives	Quinoline carboxylic acids	-	206.044	2.50568	M+H	C10H7NO4	0	42.8	metab_1488	pos_1489	pos	46.7	4.388	0.4477	5.054	0.2921
Enalaprilat	0.01232	0.08161	1.8356	1.8146	0.8901	-0.168	yes	down	B(i)	C11720	-	-	-	-	-	-	HMDB0041886;PW_C022647	Organic acids and derivatives	Carboxylic acids and derivatives	Amino acids, peptides, and analogues	76420-72-9	349.175	5.49622	M+H	C18H24N2O5	44.9	0	metab_7740	pos_7741	pos	45.6	4.398	0.2524	4.941	0.2274
5-Phenyl-1,3-Oxazinane-2,4-Dione	0.001917	0.02499	1.8298	1.8301	0.9176	-0.1241	yes	down	B(ii)	C16596	-	-	map00982	Drug metabolism - cytochrome P450	Metabolism	Xenobiotics biodegradation and metabolism	HMDB0060400	Benzenoids	Benzene and substituted derivatives	Not Available	-;_	192.065	4.4027	M+H	C10H9NO3	0	65.9	metab_8289	pos_8290	pos	52.5	5.531	0.1953	6.028	0.0648
Etiracetam	0.005603	0.04941	1.8173	1.8468	0.9046	-0.1447	yes	down	B(ii)	-	-	-	-	-	-	-	HMDB0252105	Organic acids and derivatives	Carboxylic acids and derivatives	Amino acids, peptides, and analogues	-	229.119	3.20157	M+Hac-H	C8H14N2O2	0	41.5	metab_12479	neg_1288	neg	47.1	5.071	0.04363	5.606	0.3049
5-Hydroxyindole	0.0005556	0.01226	1.8082	1.7998	0.9089	-0.1378	yes	down	B(i)	-	-	-	-	-	-	-	HMDB0059805	Organoheterocyclic compounds	Indoles and derivatives	Hydroxyindoles	-	134.06	3.72028	M+H	C8H7NO	85.1	0	metab_2449	pos_2450	pos	55.9	4.599	0.1496	5.06	0.03168
(5R)-Trans-1,7-Diphenyl-5-Hydroxy-6-Hepten-3-One	0.02179	0.1149	1.8007	1.7221	0.9017	-0.1492	yes	down	B(i)	-	-	-	-	-	-	-	-	-	-	-	-	303.133	5.89395	M+Na	C19H20O2	39.8	0	metab_3587	pos_3588	pos	43.8	4.772	0.2804	5.292	0.2396
Alpha-Cyano-4-Hydroxycinnamic Acid	0.0002544	0.007715	1.7997	1.7983	0.9236	-0.1146	yes	down	B(i)	-	-	-	-	-	-	-	HMDB0248196	Phenylpropanoids and polyketides	Cinnamic acids and derivatives	Hydroxycinnamic acids and derivatives	-	188.035	4.27245	M-H	C10H7NO3	36.5	0	metab_13054	neg_1863	neg	45.8	5.454	0.1276	5.905	0.03374
Methylimidazoleacetic Acid	0.02176	0.1148	1.7985	1.7854	0.9142	-0.1293	yes	down	B(i)	C05828	-	-	map01100;map00340	Metabolic pathways;Histidine metabolism	Metabolism;Metabolism	Global and overview maps;Amino acid metabolism	HMDB0002820;PW_C001712	Organoheterocyclic compounds	Azoles	Imidazoles	2625-49-2	141.066	0.952317	M+H	C6H8N2O2	36.7	0	metab_10311	pos_10312	pos	46.4	5.949	0.293	6.507	0.2689
5-Hydroxyindol-2-Carboxylic Acid	0.01261	0.08266	1.7904	1.8152	0.9033	-0.1468	yes	down	B(i)	-	-	-	-	-	-	-	-	-	-	-	-	176.034	3.0465	M-H	C9H7NO3	74.4	0	metab_12417	neg_1226	neg	51.7	5.118	0.2986	5.666	0.147
Gamma-Glutamylthreonine	0.007983	0.06192	1.778	1.744	0.9044	-0.145	yes	down	B(ii)	-	-	-	-	-	-	-	HMDB0029159	Organic acids and derivatives	Carboxylic acids and derivatives	Amino acids, peptides, and analogues	5652-48-2	293.1	4.09348	M+FA-H	C9H16N2O6	0	40.1	metab_18281	neg_7090	neg	42.7	4.606	0.2449	5.093	0.1078
Rutacridone Epoxide	0.01982	0.1085	1.7705	1.7911	0.8898	-0.1685	yes	down	B(ii)	C10739	-	-	-	-	-	-	HMDB0033853	Organoheterocyclic compounds	Quinolines and derivatives	Benzoquinolines	77996-03-3	368.117	7.24487	M+FA-H	C19H17NO4	0	47.4	metab_15883	neg_4692	neg	44.4	4.489	0.3464	5.045	0.132
4-Quinolinecarboxylic Acid	0.001657	0.02312	1.7679	1.7623	0.8994	-0.153	yes	down	B(i)	C06414	-	-	-	-	-	-	HMDB0257047	Organoheterocyclic compounds	Quinolines and derivatives	Quinoline carboxylic acids	486-74-8	174.055	4.4027	M+H	C10H7NO2	80	0	metab_2837	pos_2838	pos	54.2	4.095	0.1707	4.553	0.07454
Ansamitocin P-3	6.002e-05	0.003371	1.7624	1.7463	0.9211	-0.1186	yes	down	B(ii)	C12045;_	-	-	map01052;map01051;map01110	Type I polyketide structures;Biosynthesis of ansamycins;Biosynthesis of secondary metabolites	Metabolism;Metabolism;Metabolism	Metabolism of terpenoids and polyketides;Metabolism of terpenoids and polyketides;Global and overview maps	HMDB0248452	Phenylpropanoids and polyketides	Macrolactams	Not Available	66584-72-3;_	617.259	3.57073	M+H-H2O	C32H43ClN2O9	0	63.3	metab_8777	pos_8778	pos	43.8	4.843	0.08865	5.258	0.04254
9,10,13-Trihydroxystearic Acid	1.221e-05	0.001269	1.7602	1.7503	0.9292	-0.106	yes	down	B(ii)	-	-	-	-	-	-	-	HMDB0030935	Lipids and lipid-like molecules	Fatty Acyls	Fatty acids and conjugates	50439-74-2	374.289	5.96408	M+ACN+H	C18H36O5	0	60.7	metab_7446	pos_7447	pos	48.7	5.38	0.06382	5.79	0.04392
4-Hydroxyproline Galactoside	0.0007669	0.01444	1.7587	1.7499	0.9171	-0.1248	yes	down	B(ii)	-	-	-	-	-	-	-	HMDB0029354	Lipids and lipid-like molecules	Fatty Acyls	Fatty alcohol esters	80185-44-0	292.104	0.7118	M-H	C11H19NO8	0	76.8	metab_19427	neg_8236	neg	52.9	4.868	0.1045	5.308	0.1296
1-Kestose	0.01842	0.1041	1.7553	1.7297	0.9091	-0.1376	yes	down	B(i)	C03661	-	-	-	-	-	-	HMDB0011729	Organic oxygen compounds	Organooxygen compounds	Carbohydrates and carbohydrate conjugates	470-69-9	527.157	0.658933	M+Na	C18H32O16	84.8	0	metab_528	pos_529	pos	53.5	5.148	0.2847	5.663	0.1977
2'-Deoxymugineic Acid	0.000148	0.005686	1.7548	1.7456	0.9228	-0.116	yes	down	B(ii)	C15485;_	-	-	map01100;map01110;map00999	Metabolic pathways;Biosynthesis of secondary metabolites;Biosynthesis of various plant secondary metabolites	Metabolism;Metabolism;Metabolism	Global and overview maps;Global and overview maps;Biosynthesis of other secondary metabolites	HMDB0033909	Organic acids and derivatives	Carboxylic acids and derivatives	Amino acids, peptides, and analogues	74235-24-8;_	305.134	1.02245	M+H	C12H20N2O7	0	59	metab_888	pos_889	pos	48.7	5.029	0.104	5.45	0.04816
2,6-Dimethoxybenzoic Acid	0.01346	0.08573	1.7311	1.6808	0.9009	-0.1505	yes	down	B(i)	-	-	-	-	-	-	-	HMDB0029273	Benzenoids	Benzene and substituted derivatives	Benzoic acids and derivatives	1466-76-8	224.091	5.80043	M+ACN+H	C9H10O4	54.3	0	metab_3517	pos_3518	pos	48.8	4.292	0.2608	4.764	0.1294
Asp Asp Phe	9.738e-05	0.004477	1.7268	1.7273	0.9198	-0.1206	yes	down	B(i)	-	-	-	-	-	-	-	-	-	-	-	-	378.129	3.48425	M+H-H2O	C17H21N3O8	41.1	0	metab_2296	pos_2297	pos	45.9	4.667	0.08128	5.074	0.06997
Fumagillol	0.00125	0.01941	1.7246	1.7059	0.9168	-0.1254	yes	down	B(ii)	C22618;_	-	-	map01100;map01110;map00998	Metabolic pathways;Biosynthesis of secondary metabolites;Biosynthesis of various antibiotics	Metabolism;Metabolism;Metabolism	Global and overview maps;Global and overview maps;Biosynthesis of other secondary metabolites	HMDB0252515	Organic oxygen compounds	Organooxygen compounds	Alcohols and polyols	108102-51-8;_	303.156	3.8628	M+Na-2H	C16H26O4	0	42.5	metab_18406	neg_7215	neg	44	4.648	0.1195	5.07	0.1229
Cryptotanshinone	4.264e-05	0.002707	1.723	1.7031	0.9264	-0.1102	yes	down	B(i)	-	-	-	-	-	-	-	HMDB0035220	Lipids and lipid-like molecules	Prenol lipids	Diterpenoids	35825-57-1	297.151	6.04195	M+H	C19H20O3	49.4	0	metab_7319	pos_7320	pos	45	4.962	0.08107	5.356	0.03399
6-Methyl 2-Galloylgalactarate	0.0005684	0.01242	1.7128	1.7022	0.9283	-0.1074	yes	down	B(ii)	-	-	-	-	-	-	-	HMDB0036934	Organic oxygen compounds	Organooxygen compounds	Carbohydrates and carbohydrate conjugates	-	435.081	4.26445	M+Hac-H	C14H16O12	0	49	metab_18206	neg_7015	neg	46.9	5.345	0.1347	5.758	0.02689
Hypaphorine	0.0081	0.06245	1.7077	1.741	0.9053	-0.1436	yes	down	B(i)	C09213	-	-	-	-	-	-	HMDB0061115	Organic acids and derivatives	Carboxylic acids and derivatives	Amino acids, peptides, and analogues	487-58-1	247.144	3.23278	M+H	C14H18N2O2	71.2	0	metab_2117	pos_2118	pos	50.8	4.653	0.2296	5.14	0.1474
1-Hydroxyisoquinoline	0.002029	0.02584	1.7016	1.7019	0.9248	-0.1127	yes	down	B(i)	C06324	-	-	-	-	-	-	HMDB0243900	Organoheterocyclic compounds	Isoquinolines and derivatives	Isoquinolones and derivatives	-	146.06	4.4027	M+H	C9H7NO	71.9	0	metab_8290	pos_8291	pos	53.5	5.303	0.171	5.734	0.05742
Prostaglandin B2	0.00976	0.07109	1.6938	1.6367	0.9242	-0.1137	yes	down	B(i)	C05954	Lipids	Eicosanoids	map00590;map01100;map04726	Arachidonic acid metabolism;Metabolic pathways;Serotonergic synapse	Metabolism;Metabolism;Organismal Systems	Lipid metabolism;Global and overview maps;Nervous system	HMDB0004236;PW_C002099	Lipids and lipid-like molecules	Fatty Acyls	Eicosanoids	13367-85-6	379.212	5.78692	M+FA-H	C20H30O4	82.4	0	metab_17510	neg_6319	neg	55	5.319	0.2309	5.755	0.0935
1-(2-Bromophenyl)-3-(2-Hydroxy-4-Nitrophenyl)Urea	0.02987	0.1397	1.6875	1.7014	0.8928	-0.1636	yes	down	B(i)	-	-	-	-	-	-	-	-	-	-	-	-	385.954	4.96567	M+Cl	C13H10BrN3O4	42.1	0	metab_13357	neg_2166	neg	36.9	4.338	0.3559	4.859	0.1474
Liquidambaric Lactone	0.02121	0.1128	1.6728	1.6058	0.9214	-0.118	yes	down	B(i)	-	-	-	-	-	-	-	-	-	-	-	-	469.328	6.92995	M+H	C30H44O4	51.4	0	metab_6023	pos_6024	pos	46.2	5.267	0.2983	5.716	0.03213
Lysope(0:0/16:1(9Z))	0.0336	0.1506	1.6721	1.6714	0.8921	-0.1648	yes	down	B(ii)	-	-	-	-	-	-	-	HMDB0011474	Lipids and lipid-like molecules	Glycerophospholipids	Glycerophosphoethanolamines	-	416.252	5.53525	M+H-2H2O	C21H42NO7P	0	62	metab_3402	pos_3403	pos	46.2	4.24	0.233	4.753	0.3528
Lomustine	0.03373	0.151	1.6529	1.6354	0.8927	-0.1638	yes	down	B(ii)	C07079	-	-	-	-	-	-	HMDB0015337	Organic acids and derivatives	Organic carbonic acids and derivatives	Ureas	13010-47-4	268.065	5.7789	M+Cl	C9H16ClN3O2	0	46.1	metab_13740	neg_2549	neg	41.5	4.083	0.3399	4.574	0.1616
Gibberellin A24	0.0002889	0.008212	1.6521	1.6525	0.9249	-0.1126	yes	down	B(ii)	C11861;_	-	-	map01100;map00904;map01110	Metabolic pathways;Diterpenoid biosynthesis;Biosynthesis of secondary metabolites	Metabolism;Metabolism;Metabolism	Global and overview maps;Metabolism of terpenoids and polyketides;Global and overview maps	HMDB0303459	Lipids and lipid-like molecules	Prenol lipids	Diterpenoids	19427-32-8;_;	347.185	4.94985	M+H	C20H26O5	0	49.3	metab_3114	pos_3115	pos	45.8	4.704	0.112	5.086	0.01979
Histidylleucine	0.002102	0.02648	1.6518	1.6669	0.9169	-0.1252	yes	down	B(ii)	C05010	-	-	-	-	-	-	HMDB0028889	Organic acids and derivatives	Carboxylic acids and derivatives	Amino acids, peptides, and analogues	7763-65-7	251.151	3.75923	M+H-H2O	C12H20N4O3	0	47.9	metab_8646	pos_8647	pos	45.8	4.565	0.09868	4.979	0.163
Glu Met Tyr	0.002998	0.03297	1.6422	1.5984	0.9234	-0.115	yes	down	B(i)	-	-	-	-	-	-	-	-	-	-	-	-	442.163	3.74365	M+H	C19H27N3O7S	53	0	metab_8652	pos_8653	pos	45.9	4.665	0.1195	5.052	0.1425
Sec-O-Glucosylhamaudol	0.01475	0.09093	1.6401	1.6221	0.9188	-0.1221	yes	down	B(ii)	C17484;_	-	-	-	-	-	-	HMDB0258199	Organoheterocyclic compounds	Benzopyrans	1-benzopyrans	-;_	459.13	5.06988	M+Na-2H	C21H26O10	0	45.2	metab_17844	neg_6653	neg	46.5	5.016	0.2473	5.459	0.1306
Kahweol	2.464e-05	0.001931	1.6395	1.6243	0.944	-0.0831	yes	down	B(i)	C09893	-	-	map01110;map00902	Biosynthesis of secondary metabolites;Monoterpenoid biosynthesis	Metabolism;Metabolism	Global and overview maps;Metabolism of terpenoids and polyketides	HMDB0035602	Lipids and lipid-like molecules	Prenol lipids	Monoterpenoids	6894-43-5	315.195	6.3124	M+H	C20H26O3	46.5	0	metab_6805	pos_6806	pos	47	6.002	0.06482	6.358	0.03526
Australine	6.958e-06	0.000894	1.6379	1.6227	0.9431	-0.0846	yes	down	B(i)	C10132	-	-	-	-	-	-	-	-	-	-	118396-02-4	190.107	0.712567	M+H	C8H15NO4	56.2	0	metab_10504	pos_10505	pos	48.9	5.815	0.03479	6.166	0.05413
3-(4-Hydroxyphenyl)Propionic Acid	0.0002881	0.008212	1.6313	1.6449	0.9293	-0.1058	yes	down	B(i)	C01744	-	-	map01100;map00946	Metabolic pathways;Degradation of flavonoids	Metabolism;Metabolism	Global and overview maps;Biosynthesis of other secondary metabolites	HMDB0002199	Phenylpropanoids and polyketides	Phenylpropanoic acids	Not Available	501-97-3	225.076	3.88287	M+Hac-H	C9H10O3	80.6	0	metab_18396	neg_7205	neg	53.2	4.983	0.095	5.362	0.06856
N-Lauroylsarcosine	0.02295	0.1186	1.6213	1.5586	0.916	-0.1265	yes	down	B(i)	-	-	-	-	-	-	-	HMDB0255165	Organic acids and derivatives	Carboxylic acids and derivatives	Amino acids, peptides, and analogues	-	272.221	5.01228	M+H	C15H29NO3	74.6	0	metab_7967	pos_7968	pos	52.9	4.658	0.02821	5.085	0.334
Pyridinoline	0.009183	0.06853	1.6153	1.6193	0.9217	-0.1177	yes	down	B(ii)	-	-	-	-	-	-	-	HMDB0000851	Organic acids and derivatives	Carboxylic acids and derivatives	Amino acids, peptides, and analogues	63800-01-1	461.227	4.29272	M+CH3OH+H	C18H28N4O8	0	67.2	metab_8349	pos_8350	pos	51.2	4.988	0.2327	5.412	0.03653
Vanilloyl Glucose	8.528e-05	0.004064	1.6126	1.6063	0.9293	-0.1058	yes	down	B(ii)	C20470	-	-	-	-	-	-	HMDB0302470	Phenylpropanoids and polyketides	Tannins	Hydrolyzable tannins	-	389.109	3.17517	M+Hac-H	C14H18O9	0	82.1	metab_18784	neg_7593	neg	54	4.639	0.05333	4.992	0.07793
Glu Leu Ser	0.001871	0.02467	1.6079	1.5896	0.9316	-0.1023	yes	down	B(i)	-	-	-	-	-	-	-	-	-	-	-	-	330.165	1.13925	M+H-H2O	C14H25N3O7	52	0	metab_955	pos_956	pos	46.5	5.051	0.1025	5.422	0.1283
Ethanethioic Acid, S-(2-(((2R)-2-(Acetylamino)-3-Mercapto-1-Oxopropyl)Amino)Ethyl)Ester	0.01781	0.1019	1.6054	1.6426	0.9137	-0.1302	yes	down	B(ii)	-	-	-	-	-	-	-	HMDB0253314	Organic acids and derivatives	Carboxylic acids and derivatives	Amino acids, peptides, and analogues	-	285.036	2.70688	M+Na-2H	C9H16N2O3S2	0	43.9	metab_12395	neg_1204	neg	44.8	4.904	0.2404	5.367	0.2004
Kapa	0.002215	0.02745	1.601	1.6076	0.9303	-0.1043	yes	down	B(i)	C01092	-	-	map01100;map00780;map01240	Metabolic pathways;Biotin metabolism;Biosynthesis of cofactors	Metabolism;Metabolism;Metabolism	Global and overview maps;Metabolism of cofactors and vitamins;Global and overview maps	HMDB0240687	Lipids and lipid-like molecules	Fatty Acyls	Fatty acids and conjugates	-	188.128	4.6453	M+H	C9H17NO3	72.9	0	metab_2967	pos_2968	pos	53.5	5.137	0.1055	5.522	0.1418
(Z)-5-[(2R,3S,4S)-4-Hydroxy-2-[(E)-3-Hydroxyoct-1-Enyl]Oxan-3-Yl]Pent-3-Enoic Acid	0.0007031	0.01386	1.5956	1.5606	0.9379	-0.0924	yes	down	B(ii)	-	-	-	-	-	-	-	HMDB0244345	Organic acids and derivatives	Hydroxy acids and derivatives	Medium-chain hydroxy acids and derivatives	-	347.186	6.2916	M+Na-2H	C18H30O5	0	49	metab_16802	neg_5611	neg	46.9	5.274	0.08768	5.623	0.09441
Indole-3-Carboxylic Acid	0.02947	0.1386	1.5938	1.6388	0.9218	-0.1174	yes	down	B(i)	C19837	-	-	-	-	-	-	HMDB0003320	Organoheterocyclic compounds	Indoles and derivatives	Indolecarboxylic acids and derivatives	771-50-6	162.055	2.50568	M+H	C9H7NO2	61.1	0	metab_9643	pos_9644	pos	51.5	5.756	0.2836	6.244	0.2415
N-(2-Methoxyethyl)-1-[3-(Trifluoromethyl)Benzoyl]Piperidine-3-Carboxamide	0.03302	0.1489	1.5846	1.5558	0.9116	-0.1335	yes	down	B(i)	-	-	-	-	-	-	-	-	-	-	-	-	359.157	5.34017	M+H	C17H21F3N2O3	82.1	0	metab_3299	pos_3300	pos	54.1	4.589	0.2674	5.034	0.2262
Streptidine	0.008487	0.06475	1.5767	1.5694	0.9158	-0.1269	yes	down	B(ii)	C00837;_	-	-	-	-	-	-	HMDB0258506	Organic oxygen compounds	Organooxygen compounds	Alcohols and polyols	85-17-6;_	261.134	5.1179	M-H	C8H18N6O4	0	57	metab_17830	neg_6639	neg	47.5	4.241	0.1403	4.631	0.1846
(R)-2,3-Dihydro-3,5-Dihydroxy-2-Oxo-3-Indoleacetic Acid	0.01816	0.1031	1.5761	1.6138	0.9242	-0.1136	yes	down	B(ii)	-	-	-	-	-	-	-	HMDB0038941	Organoheterocyclic compounds	Indoles and derivatives	Indolyl carboxylic acids and derivatives	-	258.017	2.69332	M+Cl	C10H9NO5	0	43.5	metab_12392	neg_1201	neg	47.8	5.466	0.2247	5.914	0.2081
Lactulose	0.01692	0.09879	1.5703	1.5517	0.9348	-0.0972	yes	down	B(i)	C07064	-	-	-	-	-	-	HMDB0000740	Organic oxygen compounds	Organooxygen compounds	Carbohydrates and carbohydrate conjugates	4618-18-2	365.105	0.658933	M+Na	C12H22O11	58.7	0	metab_526	pos_527	pos	50.1	5.894	0.2465	6.305	0.09552
2-Furanmethanol	0.02415	0.1222	1.5647	1.4964	0.9131	-0.1312	yes	down	B(i)	C20441	-	-	map01120;map00365	Microbial metabolism in diverse environments;Furfural degradation	Metabolism;Metabolism	Global and overview maps;Xenobiotics biodegradation and metabolism	HMDB0013742	Organoheterocyclic compounds	Heteroaromatic compounds	Not Available	98-00-0	99.0443	3.64943	M+H	C5H6O2	48	0	metab_2399	pos_2400	pos	48	4.159	0.1991	4.555	0.2146
Seneciphylline	0.0003708	0.00962	1.5627	1.5515	0.9339	-0.0986	yes	down	B(ii)	C10391;_	-	-	-	-	-	-	HMDB0258231	Alkaloids and derivatives	Not Available	Not Available	480-81-9;_	354.13	4.02292	M+Na-2H	C18H23NO5	0	44.8	metab_12932	neg_1741	neg	44.7	4.764	0.05375	5.101	0.103
Formestane	0.02061	0.1108	1.5617	1.5688	0.9253	-0.1119	yes	down	B(i)	-	-	-	-	-	-	-	-	-	-	-	-	303.195	5.92513	M+H	C19H26O3	73.8	0	metab_3627	pos_3628	pos	52.2	5.255	0.2461	5.679	0.1574
Plumieride	0.0004357	0.01059	1.5586	1.5508	0.9359	-0.0955	yes	down	B(ii)	C09797;_	-	-	-	-	-	-	HMDB0256647	Lipids and lipid-like molecules	Prenol lipids	Terpene glycosides	511-89-7;_	435.128	3.52392	M+H-2H2O	C21H26O12	0	55.9	metab_8803	pos_8804	pos	48.9	4.967	0.1059	5.307	0.02373
3-(2-Hydroxyethyl)Histidine	0.0003245	0.008894	1.5439	1.5491	0.9383	-0.0918	yes	down	B(ii)	-	-	-	-	-	-	-	HMDB0245773	Organic acids and derivatives	Carboxylic acids and derivatives	Amino acids, peptides, and analogues	-	182.092	0.636367	M+H-H2O	C8H13N3O3	0	50.9	metab_10669	pos_10670	pos	48	5.127	0.05839	5.464	0.09624
Scorzoside	0.001198	0.01899	1.5436	1.5193	0.9342	-0.0982	yes	down	B(ii)	-	-	-	-	-	-	-	HMDB0040713	Lipids and lipid-like molecules	Prenol lipids	Terpene lactones	106009-45-4	443.228	4.85618	M+CH3OH+H	C21H30O8	0	42.3	metab_8054	pos_8055	pos	46.1	4.771	0.08537	5.107	0.1079
Cowagarcinone D	0.0005534	0.01225	1.543	1.5572	0.9358	-0.0957	yes	down	B(ii)	-	-	-	-	-	-	-	HMDB0304628	Organoheterocyclic compounds	Benzopyrans	1-benzopyrans	-	526.218	5.2621	M+ACN+Na	C28H30O6	0	66.5	metab_7860	pos_7861	pos	49.5	5.03	0.09039	5.375	0.07989
4-Hydroxyhexanoylglycine	0.005078	0.04645	1.5409	1.5776	0.9318	-0.1018	yes	down	B(ii)	-	-	-	-	-	-	-	HMDB0094721	Organic acids and derivatives	Carboxylic acids and derivatives	Amino acids, peptides, and analogues	-	231.134	2.71695	M+ACN+H	C8H15NO4	0	44.1	metab_9530	pos_9531	pos	47.3	5.291	0.04419	5.678	0.2135
Walleminone	0.0018	0.02421	1.5404	1.5585	0.937	-0.0938	yes	down	B(i)	-	-	-	-	-	-	-	-	-	-	-	-	235.169	6.23472	M+H-H2O	C15H24O3	66.6	0	metab_4119	pos_4120	pos	51	5.343	0.08352	5.702	0.1374
Ala Gln Thr	0.001529	0.02192	1.539	1.522	0.9459	-0.0803	yes	down	B(i)	-	-	-	-	-	-	-	-	-	-	-	-	319.165	5.90177	M+H	C12H22N4O6	37.2	0	metab_7527	pos_7528	pos	44.3	5.961	0.1328	6.302	0.01946
2-(Malonylamino)Benzoic Acid	0.02614	0.1286	1.5372	1.5801	0.9367	-0.0943	yes	down	B(ii)	C03147	-	-	-	-	-	-	HMDB0039495	Benzenoids	Benzene and substituted derivatives	Benzoic acids and derivatives	53947-84-5	222.04	2.69332	M-H	C10H9NO5	0	54.9	metab_18861	neg_7670	neg	50.1	6.605	0.2383	7.051	0.2348
Xanthurenic Acid	0.00579	0.05057	1.5365	1.5606	0.9274	-0.1087	yes	down	B(i)	C02470	-	-	map00380	Tryptophan metabolism	Metabolism	Amino acid metabolism	HMDB0000881;PW_C000703	Organoheterocyclic compounds	Quinolines and derivatives	Quinoline carboxylic acids	59-00-7	204.03	5.20405	M-H	C10H7NO4	96.8	0	metab_17784	neg_6593	neg	57.8	4.893	0.1425	5.276	0.15
8-Amino Caprylic Acid	0.009954	0.07201	1.5254	1.5151	0.9238	-0.1144	yes	down	B(i)	-	-	-	-	-	-	-	-	-	-	-	-	160.133	3.78327	M+H	C8H17NO2	38.1	0	metab_2493	pos_2494	pos	46.4	4.534	0.06044	4.908	0.2327
5-[[5-[[5-(Pyrrol-2-Ylidenemethyl)Pyrrol-2-Ylidene]Methyl]-1H-Pyrrol-2-Yl]Methylidene]Pyrrole-2-Carboxylic Acid	0.0001654	0.006066	1.5184	1.4877	0.9458	-0.0804	yes	down	B(ii)	-	-	-	-	-	-	-	HMDB0260427	Organoheterocyclic compounds	Tetrapyrroles and derivatives	Not Available	-	360.146	5.43382	M+NH4	C20H14N4O2	0	49.2	metab_3345	pos_3346	pos	47.5	5.336	0.06246	5.642	0.06311
Adrenochrome	0.02604	0.1283	1.5169	1.5603	0.9164	-0.126	yes	down	B(ii)	-	-	-	-	-	-	-	HMDB0012884	Organoheterocyclic compounds	Indoles and derivatives	Not Available	7506-92-5	178.05	2.69332	M-H	C9H9NO3	0	52	metab_12391	neg_1200	neg	47.3	4.766	0.217	5.201	0.2473
Cbhcy	0.01146	0.07833	1.504	1.532	0.9222	-0.1169	yes	down	B(ii)	-	-	-	-	-	-	-	HMDB0249714	Organic acids and derivatives	Carboxylic acids and derivatives	Amino acids, peptides, and analogues	-	218.084	1.6457	M+H-H2O	C9H17NO4S	0	51.9	metab_1095	pos_1096	pos	47.7	4.479	0.1823	4.857	0.1414
